1 **LUZP1, a novel regulator of primary cilia and the actin cytoskeleton, is altered in**  
2 **Townes-Brocks Syndrome**

3  
4 Laura Bozal-Basterra<sup>1</sup>, María Gonzalez-Santamarta<sup>1#</sup>, Aitor Bermejo-Arteagabeitia<sup>1</sup>,  
5 Carolina Da Fonseca<sup>1</sup>, Olatz Pampliega<sup>2</sup>, Ricardo Andrade<sup>3</sup>, Natalia Martín-Martín<sup>1</sup>,  
6 Tess C Branon<sup>4,5</sup>, Alice Y Ting<sup>4-6</sup>, Arkaitz Carracedo<sup>1,7,8,9</sup>, Jose A. Rodríguez<sup>10</sup>, Felix  
7 Elortza<sup>1</sup>, James D. Sutherland<sup>1\*</sup>, Rosa Barrio<sup>1\*</sup>.

8  
9 1. CIC bioGUNE, Bizkaia Technology Park, Building 801-A, 48160 Derio, Bizkaia,  
10 Spain.

11 2. Department of Neurosciences, University of the Basque Country, Achucarro Basque  
12 Center for Neuroscience-UPV/EHU, Leioa, Spain.

13 3. Analytical & High Resolution Biomedical Microscopy Core Facility, University of  
14 the Basque Country (UPV/EHU), Leioa, Spain.

15 4. Department of Chemistry, Massachusetts Institute of Technology, Cambridge,  
16 Massachusetts, USA.

17 5. Departments of Genetics, Chemistry and Biology, Stanford University, Stanford,  
18 California, USA.

19 6. Chan Zuckerberg Biohub, San Francisco, California, USA.

20 7. CIBERONC, Instituto de Salud Carlos III, C/ Monforte de Lemos 3-5, Pabellón 11,  
21 Planta 0, 28029 Madrid, Spain.

22 8. Ikerbasque, Basque Foundation for Science, 48011 Bilbao, Spain

23 9. Biochemistry and Molecular Biology Department, University of the Basque  
24 Country (UPV/EHU), P. O. Box 644, E-48080, Bilbao, Spain.

25 10. Department of Genetics, Physical Anthropology and Animal Physiology,  
26 University of the Basque Country (UPV/EHU), Leioa, Spain.

27

28 (\*) Corresponding authors: [jsutherland@cicbiogune.es](mailto:jsutherland@cicbiogune.es), [rbarrio@cicbiogune.es](mailto:rbarrio@cicbiogune.es)

29 (#) Present address: ITAV-CNRS, Place Pierre Potier Oncopole, BP 50624, 31106  
30 Toulouse Cedex 1, France.

31

32 **Keywords:** LUZP1, actin cytoskeleton, SALL1, primary cilia, rare disease, Townes-  
33 Brocks Syndrome

34

35 **ABSTRACT**

36

37 Primary cilia are sensory organelles that are crucial for cell signaling during  
38 development and organ homeostasis. Cilia arise from the centrosome and their  
39 formation is governed by numerous regulatory factors. We show that the leucine-zipper  
40 protein LUZP1 localizes to the pericentriolar material and actin cytoskeleton. Using  
41 TurboID proximity labeling and pulldowns, LUZP1 associates with factors linked to  
42 centrosome and actin filaments. Loss of LUZP1 reduces F-actin levels, facilitating  
43 ciliogenesis and altering Sonic Hedgehog signaling, pointing to a key role in the  
44 cytoskeleton-cilia interdependency. Moreover, we show that LUZP1 interacts with a  
45 truncated form of the transcription factor SALL1 that causes Townes-Brocks Syndrome.  
46 TBS is characterized by digit, heart and kidney malformations and is linked in part to  
47 defective cilia. Truncated SALL1 increases the ubiquitin proteasome-mediated  
48 degradation of LUZP1. Alteration of LUZP1 levels may be a contributing factor to TBS,  
49 suggesting possible therapies using modulators of cilia and cytoskeletal function.

50

## 51 INTRODUCTION

52 Primary cilia are sensory organelles that have a crucial role in cell signaling,  
53 polarity and protein trafficking during development and organ homeostasis.  
54 Importantly, the involvement of primary cilia in the above-mentioned processes is  
55 frequently due to its role in Sonic Hedgehog (Shh) pathway regulation (1). Briefly, Shh  
56 activation through its receptor PTCH1 leads to ciliary enrichment of the transmembrane  
57 protein Smoothed (SMO), with concomitant conversion of the transcription factor  
58 GLI3 from a cleaved repressor form to a full-length activator form, leading to activation  
59 of Shh target genes. Two such genes are *PTCH1* and *GLI1* (encoding the Shh receptor  
60 and a transcriptional activator, respectively), exemplifying the feedback and fine-tuning  
61 of the Shh pathway.

62 Cilia arise from the centrosome, a cellular organelle composed of two barrel-  
63 shaped microtubule-based structures called the centrioles. Primary cilia formation is  
64 very dynamic throughout the cell cycle. Cilia are nucleated from the mother centriole  
65 (MC) at the membrane-anchored basal body upon entry into the G0 phase, and they  
66 reabsorb as cells progress from G1 to S phase, completely disassembling in mitosis (2).  
67 Centrioles are surrounded by protein-based matrix pericentriolar material (PCM) (3, 4).  
68 In eukaryotic cells, PCM proteins are concentrically arranged around a centriole in a  
69 highly organized manner (5-8). Based on this observation, proper positioning and  
70 organization of PCM proteins may be important for promoting different cellular  
71 processes in a spatially regulated way (9). Not surprisingly, aberrations in the function  
72 of PCM scaffolds are also associated with many human diseases, including cancer and  
73 ciliopathies (10, 11).

74 Cilia assembly and disassembly are regulated by diverse factors, including the  
75 main cilia suppressor proteins CCP110 and CEP97 and the actin cytoskeleton. CCP110

76 and CEP97 form a complex that, when removed from the MC, allows ciliogenesis (12).

77 The regulation of actin dynamics is also considered a major ciliogenesis driver in

78 cycling cells (13).

79 Ciliary dysfunction often results in early developmental problems including

80 hydrocephalus, neural tube closure defects (NTD) and left-right anomalies (14). These

81 features are often reported in a variety of diseases, collectively known as ciliopathies,

82 caused by failure of cilia formation and/or cilia-dependent signaling (15). In the adult,

83 depending on the underlying mutation, ciliopathies present a broad spectrum of

84 phenotypes comprising cystic kidneys, polydactyly, obesity or heart malformation.

85 Townes-Brocks Syndrome (TBS1 [MIM: 107480]) is an autosomal dominant

86 genetic disease caused by mutations in *SALL1*, characterized by the presence of

87 imperforate anus, dysplastic ears, thumb malformations, and often with renal and heart

88 impairment, among other symptoms (16, 17), features seen in the ciliopathic spectrum.

89 It has been recently demonstrated that primary cilia defects are contributing factors to

90 TBS aetiology (18). Truncated *SALL1*, either by itself or in complex with the *SALL1*

91 full length form (*SALL1*<sup>FL</sup>), can interact with CCP110 and CEP97. As a consequence,

92 those negative regulators disappear from the MC and ciliogenesis is promoted (18).

93 Truncated *SALL1* likely interferes with multiple factors to give rise to TBS phenotypes.

94 Here we focus on LUZP1, a leucine-zipper motif containing protein that was identified

95 by proximity proteomics as an interactor of truncated *SALL1* (18).

96 LUZP1 has also been identified as an interactor of ACTR2 (ARP2 actin related

97 protein 2 homologue) and filamin A (FLNA) and, recently, as an actin cross-linking

98 protein (19, 20). Furthermore, LUZP1 shows homology to FILIP1, a protein interactor

99 of FLNA and actin (21, 22). Interestingly, mutations in *Luzp1* resulted in cardiovascular

100 defects and cranial NTD in mice (23), phenotypes within the spectrum of those seen in

101 TBS individuals and mouse models of dysfunctional cilia, respectively (16, 17, 24-27).  
102 LUZP1 was found to be mainly localized to the nuclei of brain neurons in mice and to  
103 have a crucial role in embryonic brain development (23, 28, 29). Both the planar cell  
104 polarity/Wingless-Integrated (Wnt) pathway and the Sonic Hedgehog (Shh) pathway  
105 are influenced by the presence of functional cilia and regulate neural tube closure and  
106 patterning (30-32). Remarkably, ectopic SHH was observed in the dorsal lateral  
107 neuroepithelium of the *Luzp1*<sup>-/-</sup> mice (23). However, in spite of the phenotypic overlaps,  
108 a link between LUZP1 and ciliogenesis had not been previously investigated.

109 Here we demonstrate that LUZP1 is associated with centrosomal and actin  
110 cytoskeleton-related proteins. We also demonstrate that LUZP1 localizes to the PCM,  
111 actin cytoskeleton and the midbody, providing evidence towards its regulatory role on  
112 actin dynamics and its subsequent impact on ciliogenesis. Notably, we demonstrate that  
113 *Luzp1*<sup>-/-</sup> cells exhibit reduced polymerized actin, longer primary cilia, higher rates of  
114 ciliogenesis and increased Shh signaling. Furthermore, TBS-derived primary  
115 fibroblasts show a reduction in LUZP1 and actin filaments (F-actin), possibly through  
116 SALL1-regulated LUZP1 degradation via the ubiquitin (Ub)-proteasome system (UPS).  
117 Altogether, these results indicate that LUZP1 participates in ciliogenesis and  
118 maintenance of the actin cytoskeleton and might contribute to the aberrant cilia  
119 phenotype in TBS.

120

## 121 **RESULTS**

### 122 **SALL1 interacts with LUZP1**

123 We have previously shown that a truncated and mislocalized form of SALL1  
124 present in TBS individuals (*SALL1*<sup>275</sup>) can interact aberrantly with cytoplasmic  
125 proteins. (18). LUZP1 was found among the most enriched proteins in the *SALL1*<sup>275</sup>

126 interactome. We confirmed this finding by independent BioID experiments analyzed  
127 by Western blot using a LUZP1-specific antibody (Figure 1A and Figure 1-figure  
128 supplement 1). To further characterize the interaction of LUZP1 with SALL1, we  
129 performed pulldowns with tagged SALL1<sup>275</sup>-YFP in HEK 293FT cells. Our results  
130 showed that endogenous LUZP1 was able to interact with SALL1<sup>275</sup>, confirming our  
131 proximity proteomics data (Figure 1B, lane 6, and Figure 1-figure supplement 1). The  
132 interaction with SALL1<sup>275</sup> persisted in presence of overexpressed *SALL1<sup>FL</sup>* (Figure 1B,  
133 lane 9, and Figure 1-figure supplement 1), suggesting that the possible  
134 heterodimerization of the truncated and FL forms does not inhibit the interaction with  
135 LUZP1. Of interest, LUZP1 also interacts with SALL1<sup>FL</sup> when overexpressed alone  
136 (Figure 1B, lane 7 and Figure 1-figure supplement 1). These results support the notion  
137 that the truncated form of SALL1 expressed in TBS individuals, either by itself or in  
138 complex with the FL form, can interact with LUZP1.

139

#### 140 **LUZP1 proximal interactors enriched for centrosomal and actin cytoskeleton** 141 **components**

142 To gain some clues into the function of LUZP1, we sought to identify its  
143 proximal interactome using the TurboID approach (33). We used hTERT-RPE1 cells  
144 stably expressing low levels of FLAG-TurboID-LUZP1, and after a brief biotin-  
145 labeling, biotinylated proteins were captured for analysis by liquid chromatography  
146 tandem mass spectrometry (LC-MS/MS). 311 high-confidence proximity LUZP1  
147 interactors were identified in at least two replicates (Table S1). With the purpose of  
148 obtaining a functional overview of the main pathways associated to LUZP1, a  
149 comparative Gene Ontology (GO) analysis was performed with all the hits (Figure 1C-  
150 E and Table S1). In the Cellular Component domain, “cytoplasm”, “actin cytoskeleton”,

151 “centrosome”, “midbody”, “cell junction” and “vesicle” terms were highlighted (Figure  
152 1C and Table S1). In the category of Biological Process, LUZP1 proteome shows  
153 enrichment in the "cytoskeleton organization", vesicle-mediated transport and cell  
154 adhesion categories among others (Figure 1D and Table S1). With respect to Molecular  
155 Function, LUZP1 also showed enrichment in cytoskeleton-related proteins ("structural  
156 component of cytoskeleton" and "actin binding" terms; Figure 1E and Table S1). 64 or  
157 138 of the verified or potential, respectively, centrosome/cilia gene products previously  
158 identified by proteomic analyzes (34, 35) were found as LUZP1 proximal interactors,  
159 supporting the enrichment of centrosome-related proteins among the potential  
160 interactors of LUZP1. In addition, 48 of LUZP1 proximal interactors were present  
161 among the actin-localized proteins identified by the Human Protein Atlas project based  
162 on actin filaments subcellular localization (36).

163

#### 164 **LUZP1 localizes to the PCM, with altered levels and distribution in TBS** 165 **fibroblasts**

166 Based on the interaction of LUZP1 with centrosomal proteins, we examined the  
167 subcellular localization of LUZP1 at the centrosome. Immunostainings showed that  
168 LUZP1 appeared as a basket-like 3D structure surrounding both centrioles, which were  
169 labelled by centrin 2 (CETN2) staining in human RPE1 cells (Figure 2A) as well as in  
170 human dermal fibroblasts (Figure 2B and Figure 2-supplementary video 1) and U2OS  
171 cells (Figure 2C). Next, to compare LUZP1 with additional centriolar markers, we  
172 labelled U2OS cells expressing *YFP-LUZP1* with the distal centriolar markers CCP110  
173 and ODF2 (outer dense fiber of sperm tails 2). We did not observe colocalization of  
174 LUZP1 with these markers, indicating that LUZP1 is likely found at the proximal end  
175 of both centrioles (Figure 2D). We further imaged LUZP1 along with PCM1 and

176 centrobins, markers of PCM and of the MC, respectively. Interestingly, we observed  
177 LUZP1 being surrounded by PCM1 (Figure 2E), while LUZP1 surrounded centrobins  
178 at the MC (Figure 2G). The profile histograms confirm that LUZP1 localizes between  
179 PCM1 and centrobins (Figure 2F and 2H, respectively), suggesting that LUZP1 might  
180 be a novel PCM associated-protein, forming a basket around the proximal end of both  
181 centrioles. We also examined LUZP1 localization in the centrosome in synchronized  
182 human RPE1-cells. LUZP1 was reduced at the centrosome during G2/M and G0 phases  
183 (Figure 2-figure supplement 2). LUZP1 levels increased upon treatment with the  
184 proteasome inhibitor MG132 in G0 phase arrested-RPE1 cells.

185       To see whether LUZP1 localization and levels are affected in TBS, we checked  
186 its subcellular localization using super-resolution microscopy in fibroblasts derived  
187 from a TBS individual (TBS<sup>275</sup>; see Materials and Methods) as well as non-TBS  
188 controls. Our results showed that LUZP1 was markedly decreased in TBS<sup>275</sup> cells  
189 compared to control cells in non-starved conditions (Figure 3A,B) and that LUZP1 was  
190 visualized as two rings that circled each of the centrioles, stained with gamma tubulin,  
191 both in control and TBS<sup>275</sup> cells at the base of primary cilia. We also found LUZP1  
192 localized in scattered dots along the ciliary shaft in starved cells (Figure 3A,B, yellow  
193 arrows).

194

### 195 **LUZP1 interacts with centrosomal regulators**

196       LUZP1 localization in human cells and proximity labelling experiments  
197 suggested that this protein might associate with centrosome-related proteins. We  
198 previously found that SALL1<sup>275</sup>-YFP interacted with the centrosome-associated  
199 ciliogenesis suppressors, CCP110 and CEP97 (18), so we checked whether LUZP1 may  
200 also interact with these factors. Indeed, LUZP1-YFP interacts with CCP110 and CEP97



201 in both WT HEK 293FT (293<sup>WT</sup>) and in a TBS model cell line, 293<sup>335</sup> (Figure 3C, lanes  
202 5 and 7, respectively, and Figure 3-figure supplement 1) (18). Less CCP110 and CEP97  
203 was recovered in LUZP1-YFP pulldowns from 293<sup>335</sup> cells, but this is likely due to the  
204 reduced LUZP1-YFP seen in those cells (Figure 3C, Input, lanes 1 and 2 vs lane 3 and  
205 4). Beyond pulldowns, we found that immunoprecipitation of endogenous LUZP1 led  
206 to co-purification of endogenous CCP110 (Figure 3D and Figure 3-figure supplement  
207 1) and that anti-CEP97 antibodies immunoprecipitated endogenous LUZP1 (Figure 3E  
208 and Figure 3-figure supplement 1). These results confirm that, in agreement with the  
209 localization of the protein to the centrosome, LUZP1 associates with core centrosomal  
210 components.

211

### 212 **LUZP1 localizes to actin and is altered in TBS fibroblasts**

213 In addition to the localization at the centrosome/basal body, LUZP1 also  
214 localized to the actin fibers and in the midbody in dividing cells (Figure 4A and Figure  
215 4-figure supplement 2 and 3). We analyzed LUZP1 levels in synchronized human  
216 RPE1-cells. Similarly to the changes observed at the centrosome, LUZP1 levels were  
217 reduced during the G2/M and G0 phases (Figure 4-figure supplement 2). Proteasome  
218 inhibition during G0 led to increased LUZP1, suggesting that active degradation occurs  
219 in G0 arrested-RPE1 cells. Intriguingly, when LUZP1 levels were examined in TBS<sup>275</sup>  
220 cells, a reduction in both actin-associated LUZP1 and phalloidin-labelled stress fibers  
221 was observed when compared to control cells (Figures 4A-C). These results indicate  
222 that actin cytoskeleton might be altered in TBS cells. By pulldown assays, we  
223 confirmed that LUZP1-YFP interacts with both actin and FLNA (Figure 4D and Figure  
224 4-figure supplement 1). Of note, actin, FLNA and other stress fibers-associated proteins  
225 were also found to be associated with LUZP1 by proximity labeling and mass

226 spectrometry (Table S1). To examine whether LUZP1 levels change upon F-actin  
227 perturbation, HEK 293FT cells were treated with cytochalasin D (CytD), an actin-  
228 polymerization inhibitor. No changes in LUZP1 levels upon actin depolymerisation  
229 were observed when cells were lysed in strong lysis conditions (WB5). However, we  
230 observed a consistent increase in LUZP1 levels using mild lysis condition in extraction  
231 buffer containing 1% Triton X-100 (Figure 4E,F and Figure 4-figure supplement 1).  
232 These results reflect that the integrity of the actin cytoskeleton may influence the  
233 solubility but not the stability of LUZP1.

234

### 235 **LUZP1 plays a role in primary cilia formation and F-actin stabilization**

236 Based on the LUZP1 localization at the centrosome, its interaction with  
237 centrosomal proteins and the defects in ciliogenesis previously observed in TBS cells  
238 (18), we hypothesised that LUZP1 might have a role in cilia formation. To examine  
239 this, we analyze ciliogenesis in Shh-LIGHT2 cells, a cell line derived from  
240 immortalized mouse NIH3T3 fibroblasts that display primary cilia and carry a Shh  
241 luciferase reporter (herein considered as WT fibroblasts) (37). Additionally, using  
242 CRISPR/Cas9 gene editing directed to exon 1 of murine *Luzp1*, we generated Shh-  
243 LIGHT2 mouse embryonic fibroblasts null for *Luzp1* (*Luzp1*<sup>-/-</sup> cells), and for genetic  
244 rescue experiments, LUZP1 was restored to these cells by the expression of human  
245 *LUZP1-YFP* fusion (+LUZP1 cells). We examined LUZP1 localization associated with  
246 the actin cytoskeleton (Figure 5-figure supplement 1) and the centrosome (Figure 5-  
247 figure supplement 2) by immunofluorescence, and its levels by Western blot (Figure 5-  
248 figure supplement 3) in WT, *Luzp1*<sup>-/-</sup> and +LUZP1 cells. WT, *Luzp1*<sup>-/-</sup> and +LUZP1  
249 cells were plated at equal densities and induced either to ciliate for 48 hours by serum  
250 withdrawal (starved), or to reabsorb their cilia by serum replenishment for 4 hours

251 (refed) (Figure 5A). We quantified ciliation rates and primary cilia length at the  
252 mentioned timepoints. *Luzp1*<sup>-/-</sup> fibroblasts displayed higher ciliation rate (60%) than  
253 WT (10.5%) and +LUZP1 (22.2%) when the cells were not subjected to starvation  
254 (Figure 5B). However, *Luzp1*<sup>-/-</sup> cells were not significantly more ciliated than WT or  
255 +LUZP1 fibroblasts upon 48 hours of starvation or 4 hours after inducing cilia  
256 disassembly (Figure 5B). In addition, primary cilia in *Luzp1*<sup>-/-</sup> cells were significantly  
257 longer than in non-starved WT cycling cells (Figure 5A,C); under starvation the  
258 differences among WT, *Luzp1*<sup>-/-</sup> and +LUZP1 were not significant. Regarding cilia  
259 length, *Luzp1*<sup>-/-</sup> and +LUZP1 cells behaved similarly (no starvation: WT 2.3 μm;  
260 *Luzp1*<sup>-/-</sup> cells 3.0 μm; +LUZP1 cells 2.9 μm; 48 hours starvation: WT 4.2 μm; *Luzp1*<sup>-/-</sup>  
261 <sup>-/-</sup> cells 4.1 μm; +LUZP1 cells 4.8 μm; 4 hours after induction of disassembly: WT 2.4  
262 μm; *Luzp1*<sup>-/-</sup> cells 3.0 μm; +LUZP1 cells 2.9 μm; all average measures) (Figure 5A,C).  
263 These results confirm that *Luzp1*<sup>-/-</sup> cells display longer and more abundant primary cilia  
264 compared to WT cells in cycling conditions and indicate that LUZP1 might affect  
265 primary cilia dynamics. One key event in ciliogenesis is the depletion of CCP110 and  
266 its partner CEP97 from the distal end of the MC, promoting the ciliary activating  
267 program in somatic cells (12, 38-41). Our previous work demonstrated that TBS cells  
268 displayed longer and more abundant cilia and that CCP110 underwent premature  
269 displacement from the MC in non-starved TBS cells (18). Since the ciliogenesis  
270 phenotype in *Luzp1*<sup>-/-</sup> cells is reminiscent to the one described in TBS cells, we  
271 hypothesized that CCP110 might be also prematurely displaced from the centrosome  
272 in *Luzp1*<sup>-/-</sup> cells. In order to test this hypothesis, we analyzed the centrosomal  
273 localization of CCP110 in WT and *Luzp1*<sup>-/-</sup> cells by immunofluorescence. CCP110 was  
274 present at the centrosome in a higher proportion of WT cells (84%) than *Luzp1*<sup>-/-</sup> cells  
275 (19%) (Figure 5D,E). This result suggests that the lack of LUZP1 might result in

276 CCP110 displacement at the centrosome, leading to higher frequency of ciliogenesis in  
277 *Luzp1*<sup>-/-</sup> cells.

278         Based on the LUZP1 localization to the actin cytoskeleton and that a reduction  
279 in LUZP1 was accompanied by a diminishment in F-actin levels in TBS<sup>275</sup> cells, we  
280 hypothesised that LUZP1 might affect F-actin levels. First, we observed a reduction in  
281 F-actin (labelled by phalloidin) in the *Luzp1*<sup>-/-</sup> cells compared to WT, which was  
282 recovered in +LUZP1 cells (Figure 5F). Furthermore, LUZP1 levels and actin filaments  
283 were diminished in WT fibroblasts upon starvation (Figure 5G,H). These results  
284 suggest that LUZP1 might stabilize actin and that starvation triggers both LUZP1 and  
285 F-actin reduction.

286

### 287 ***Luzp1*<sup>-/-</sup> cells exhibit aberrant Sonic Hedgehog signaling**

288         It is well-established that mammalian Shh signal transduction is dependent on  
289 functional primary cilia (42, 43). Therefore, we examined whether Shh signaling is  
290 compromised in *Luzp1*<sup>-/-</sup> cells. Cells were starved for 24 hours and incubated in the  
291 presence or absence of purmorphamine (a SMO agonist) for 6 or 24 hours to activate  
292 the Shh pathway. The mRNA expression of two Shh target genes (*Gli1* and *Ptch1*) was  
293 quantified by qRT-PCR (Figure 6A,B). We found that the basal *Gli1* and *Ptch1*  
294 expression levels in *Luzp1*<sup>-/-</sup> cells were higher than in WT cells (*Gli1* 1.5 fold and *Ptch1*  
295 2.3 fold increase in *Luzp1*<sup>-/-</sup> vs WT cells without purmorphamine) (Figure 6A,6B).  
296 Upon induction by purmorphamine for 24 hours, WT cells increased significantly the  
297 expression of both targets, while *Luzp1*<sup>-/-</sup> cells did not, indicating that *Luzp1*<sup>-/-</sup> cells fail  
298 to induce Shh signaling. To further study the role of LUZP1 in Shh signaling, we  
299 analyzed GLI3 processing by Western blot using total lysates extracted from WT vs  
300 *Luzp1*<sup>-/-</sup> cells. Without purmorphamine induction, we found a significantly higher ratio

301 of GLI3 activating form vs GLI3 repressive form (GLI3-A:GLI3-R) in *Luzp1*<sup>-/-</sup> cells  
302 compared to WT (2.9 fold increase in *Luzp1*<sup>-/-</sup> cells vs WT) (Figure 6C and Figure 6-  
303 figure supplement 1). After induction, the values were similar for *Luzp1*<sup>-/-</sup> and WT cells.  
304 Since the *Luzp1*<sup>-/-</sup> parental line was *Shh*-LIGHT2, we also examined the effects of  
305 lacking *Luzp1* on *Shh* signaling by measuring the activity of a GLI-responsive Firefly  
306 luciferase reporter (Figure 6D). Prior to purmorphamine treatment, *Luzp1*<sup>-/-</sup> cells  
307 showed higher *Shh* activity compared to control or +LUZP1 cells, as observed in TBS-  
308 derived cells (1.6 fold-activity in *Luzp1*<sup>-/-</sup> vs 0.5 fold-activity in +LUZP1 cells or 1 fold-  
309 activity in WT cells) (18). However, the induction capacity of *Luzp1*<sup>-/-</sup> cells upon  
310 purmorphamine treatment was reduced compared to WT. Altogether, the observed  
311 defects in *Ptch1* and *Gli1* gene expression, reduced GLI3 processing and *Shh* reporter  
312 misregulation confirm a role for LUZP1 in *Shh* signaling.

313

### 314 **Truncated SALL1 promotes LUZP1 degradation through the ubiquitin** 315 **proteasome system (UPS) pathway**

316 In concordance with immunofluorescence results in Figures 3B and 4A, we  
317 confirmed a reduction in total LUZP1 levels in TBS<sup>275</sup> cells compared to controls by  
318 Western blot (Figure 7A,B and Figure 7-figure supplement 1). Because no  
319 transcriptional changes in *LUZP1* expression were detected between control and  
320 TBS<sup>275</sup> samples (Figure 7-figure supplement 2), we hypothesized that truncated SALL1  
321 might lead to ubiquitin-proteasome system (UPS)-mediated LUZP1 degradation. We  
322 therefore analyzed LUZP1 levels after treatment with the proteasomal inhibitor MG132,  
323 both in control and TBS<sup>275</sup> cells. LUZP1 levels were increased to a higher extent in  
324 TBS<sup>275</sup> compared to control cells (1.8 fold increase in control vs 2.4 fold increase in  
325 TBS<sup>275</sup> cells) (Figure 7A,B). Moreover, we confirmed the reduction of LUZP1 levels

326 in the CRISPR/Cas9 TBS model cell line (293<sup>335</sup>), in which the SALL1 hot-spot region  
327 was mutated, compared to its parental cell line (293<sup>WT</sup>) (Figure 7C,D and Figure 7-  
328 figure supplement 1), and likewise in HEK 293FT cells overexpressing truncated  
329 SALL1 (*SALL1*<sup>275</sup>-*YFP*) compared to cells overexpressing *YFP* as control (Figure 7E,F  
330 and Figure 7-figure supplement 1). A more prominent increase in LUZP1 accumulation  
331 upon MG132 treatment was also observed in 293<sup>335</sup> and HEK 293FT cells  
332 overexpressing *SALL1*<sup>275</sup>-*YFP* compared to controls (Figure 7C,D and Figure 7E,F,  
333 respectively, and Figure 7-figure supplement 1). Additionally, we also observed LUZP1  
334 accumulation upon MG132 treatment by immunofluorescence in RPE1 cells, both at  
335 the actin cytoskeleton (Figure 7G, upper panels) and at the centrosome (Figure 7G,  
336 lower panels). All together, these results show that LUZP1 levels are sensitive to  
337 degradation via the UPS pathway and suggest that truncated SALL1 may contribute to  
338 this process. Furthermore, we compared LUZP1 ubiquitination in 293<sup>WT</sup> vs 293<sup>335</sup> cells  
339 using the BioUb strategy (see Materials and Methods) (44). We could observe a  
340 prominent band in presence of BioUb, likely corresponding to the monoubiquitinated  
341 form of LUZP1 in the pulldowns (Figure 7G). This form was present in 293<sup>WT</sup> and  
342 293<sup>335</sup> cells, and increased in both cases in presence of MG132. In addition, we  
343 observed a smear at higher molecular weight corresponding to polyubiquitinated forms  
344 of LUZP1 (Figure 7G, Biotin PD). Notably, the LUZP1 ubiquitinated pool relative to  
345 the input levels was higher in 293<sup>335</sup> compared to 293<sup>WT</sup> cells upon MG132 treatment  
346 (Figure 7G, Biotin PD, lane 8 vs lane 11). These results reflect that truncated SALL1  
347 promotes LUZP1 degradation through the UPS pathway.

348

349 **LUZP1 overexpression represses cilia formation and increases F-actin levels in**  
350 **human fibroblasts**

351  
352 Our results suggest that LUZP1 could be a mediator of TBS cilia phenotype and  
353 that this could be caused, at least in part by the increased degradation of LUZP1  
354 triggered by truncated SALL1. Therefore, increasing LUZP1 levels in TBS cells might  
355 affect the cilia and actin cytoskeleton phenotypes. To check whether *LUZP1*  
356 overexpression is sufficient to repress ciliogenesis in primary human fibroblasts,  
357 Control and TBS<sup>275</sup> cells were transduced with *YFP* or *LUZP1-YFP* (Figure 8A).  
358 Whereas most non-transduced surrounding cells, as well as 100 % of the TBS<sup>275</sup> cells  
359 expressing *YFP* were ciliated, only 40% of the Control and TBS<sup>275</sup> cells transduced  
360 with *LUZP1-YFP* displayed cilia (Figure 8B). Furthermore, we aimed to rescue the  
361 actin cytoskeleton defects observed in TBS<sup>275</sup> cells by overexpressing *LUZP1-YFP*.  
362 Immunostaining showed that LUZP1-YFP overexpression led to an increase in F-actin  
363 levels both in control and in TBS<sup>275</sup> cells compared to the surrounding non-transfected  
364 cells or TBS<sup>275</sup> cells overexpressing *YFP* (Figure 8C). All together, these results support  
365 the notion that LUZP1 may be a potential negative regulator of cilia formation and an  
366 F-actin stabilizing protein.

367

## 368 **DISCUSSION**

369 Our results indicate that LUZP1 might be a mediator of the TBS phenotype via  
370 its interaction with truncated SALL1 and its effect on mammalian ciliogenesis: i)  
371 LUZP1 localization is altered both at the centrosome and actin cytoskeleton in TBS-  
372 derived cells; ii) LUZP1 levels are reduced in TBS-derived cells likely due to truncated  
373 SALL1-mediated degradation through the UPS; iii) LUZP1 interacts with important  
374 regulators of ciliogenesis (CCP110, CEP97) and of the actin cytoskeleton (FLNA); and  
375 iv) in the absence of LUZP1, the assembly and growth of primary cilia is enhanced in  
376 cycling cells, accompanied by an increase in basal Shh signaling. Our findings uncover

377 a perturbation of cilia and actin cytoskeleton in the absence of LUZP1. Cells adapt to  
378 serum starvation, i.e. a reduction in nutrients and growth factors, by coordinated  
379 cytoskeletal rearrangements and cilia signaling. This integrated response requires  
380 signal transduction relays that communicate the cytoplasmic actin polymerization  
381 status with cilia. Here, we propose that LUZP1 might act as a nexus in this complex  
382 intracellular network and that truncated SALL1 disrupts this network.

383

### 384 **LUZP1 localizes to the centrosome and actin cytoskeleton**

385 LUZP1 was previously described as a nuclear protein, with expression limited  
386 to the mouse brain (28, 29). We tested two different commercial antibodies against  
387 LUZP1 and, while nuclear localization was weakly detected by immunofluorescence,  
388 we observed a more prominent localization of LUZP1 to the actin cytoskeleton and  
389 centrosome, both in human and mouse cells. This localization is consistent with our  
390 TurboID analysis that showed an enrichment of factors associated with the actin  
391 cytoskeleton and/or centrosomes among the potential interactors of LUZP1. The  
392 localization of LUZP1 to the actin cytoskeleton, as well as being expressed in tissues  
393 beyond the brain, is consistent with independent validation in cell lines by the Human  
394 Protein Atlas (HPA; [proteintlas.org](http://proteintlas.org)) and other expression databases (e.g. EMBL EBI  
395 Expression Atlas [ebi.ac.uk/gxa](http://ebi.ac.uk/gxa)). Moreover, two independent proximity labeling studies  
396 identified LUZP1 as a proximal interactor of centriole (35) and centriolar satellite-  
397 related proteins (45). Here, we report that LUZP1 forms a basket-like 3D structure  
398 surrounding the proximal end of both centrioles. Like LUZP1, a large number of  
399 centrosomal scaffold proteins (as for instance Cep120, Cep57, Cep63, Cep152, CPAP,  
400 Cdk5Rap2, PCNT, among others) contain coiled-coil regions, and the proteins are  
401 concentrically localized around a centriole in a highly organized fashion (5-7).



402 Furthermore, here we show that LUZP1 interacts with centrosome and actin-related  
403 proteins (Figure 3 and Figure 4). LUZP1 has also been identified as an interactor of  
404 ACTR2 (ARP2 actin related protein 2 homologue) and FLNA (19, 20), and it has been  
405 recently described as an actin cross-linking protein (19). Additionally, we found that  
406 LUZP1 localizes not only to centrioles and actin cytoskeleton, but also to the midbody  
407 in dividing cells, which was recently reported to influence ciliogenesis in polarised  
408 epithelial cells (46).

409 Discrepancies with the previously reported LUZP1 localization and distribution  
410 might be due to technical differences, or perhaps the epitope specificity for the  
411 previously reported antiserum. Our data suggest that the association of LUZP1 to  
412 centrosomes and actin filaments in many tissues may contribute to its overall roles.

413

#### 414 **LUZP1 is altered in TBS-derived cells**

415 TBS is caused by mutations in *SALL1* gene, which lead to the formation of a  
416 truncated protein that interferes with the normal function of the cell. Here we found that  
417 LUZP1 interacts with truncated SALL1 and with SALL1<sup>FL</sup>, which suggests that  
418 interaction occurs through an N-terminal domain shared by both. We believe that, in  
419 control cells, LUZP1 and SALL1<sup>FL</sup> might have minimal interaction due to their  
420 respective localizations to the cytoplasm and nucleus. However, truncated SALL1,  
421 alone or together with SALL1<sup>FL</sup> that is retained in the cytoplasm, likely interacts with  
422 cytoplasmic LUZP1, promoting its degradation and functional inhibition. Importantly,  
423 we detected an increase in LUZP1 levels upon treatment with the proteasome inhibitor  
424 MG132 (Figure 7), suggesting that LUZP1 degradation is proteasome-mediated. Next,  
425 we demonstrated that LUZP1 is ubiquitinated, and that truncated SALL1 both increases  
426 LUZP1 ubiquitination and decreases its stability. LUZP1 ubiquitination was detected

427 in several proteomic screens for ubiquitinated proteins (47-51). The mechanism by  
428 which truncated SALL1 can influence LUZP1 ubiquitination is yet to be revealed, but  
429 one possibility could be *de novo* complexes involving specific Ub E3 ligases or de-  
430 ubiquitinases which could influence LUZP1 stability. In fact, various E3s/de-  
431 ubiquitinases were found as proximal interactors of truncated SALL1 and LUZP1, as  
432 well as other components of the UPS. Furthermore, regulation by the UPS system has  
433 been reported for centrosomal factors, necessary for the process of ciliogenesis such as  
434 CCP110 (52, 53, 54 ).

435         The phenotypes observed in TBS individuals fall within the spectrum of those  
436 observed in ciliopathies, characterized by malformations in digits, ears, heart, brain and  
437 kidneys. Defective regulation of cilia function and/or formation is a contributing factor  
438 in TBS (18). Both *Luzp1*<sup>-/-</sup> and TBS cells showed a reduction in F-actin accompanied  
439 by an increase in ciliation. We suggest that the reduction in filamentous actin in TBS  
440 cells might contribute to their higher cilia abundance, longer cilia and increased Shh  
441 signaling. By increasing LUZP1 expression in control and TBS<sup>275</sup> cells, F-actin levels  
442 are increased and cilia frequency is reduced, suggesting that LUZP1 may have a role in  
443 the TBS phenotype.

444

#### 445 **LUZP1 as an integrator of actin and primary-cilium dynamics**

446         Actin dynamics coordinate several processes that are crucial for ciliogenesis.  
447 For example, placing the MC to the appropriate area at the cell cortex is an actin-  
448 dependent process (55, 56). A reduction in cortical actin might potentially promote  
449 ciliogenesis, as there would be no physical restriction to prevent cilium growth.  
450 Supporting this hypothesis, several studies have found that changes in the actin network  
451 architecture, induced either chemically or genetically, promote ciliogenesis or affect

452 cilia length (57-62). How actin regulates cilium length is not clear. One hypothesis is  
453 that actin is involved in ectocytosis and cilium tip scission, preventing the axoneme  
454 from growing too long (63, 64). Moreover, the removal of the CCP110/CEP97 complex  
455 from the centrosome is thought to be an essential event at the beginning of cilia  
456 formation. Many proteins are known to interact with the CCP110/CEP97 complex to  
457 regulate ciliogenesis (65). We found that LUZP1 is associated with CCP110 and CEP97  
458 and that CCP110 was displaced in *Luzp1*<sup>-/-</sup> cells. However, our TurboID analysis did  
459 not detect CCP110 and CEP97 in the vicinity of LUZP1. This divergence might result  
460 from the limitation of TurboID to detect proteins that are separated further than 10 nm  
461 from each other. In fact, we found LUZP1 and CCP110 localizing to the proximal and  
462 distal end of centrioles, respectively (Figure 2D).

463

#### 464 **The role of LUZP1 in neural tube closure and cardiac defects**

465 Several studies have emphasized the tight links between cytoskeletal  
466 organization and cell fate and have implicated Shh signaling in the etiology of neural  
467 tube closure defects (66). Shh signaling is aberrant in TBS patient-derived fibroblasts  
468 (18). While reporters of Shh signaling were not examined in *Luzp1* KO mice, there was  
469 ectopic Shh expression reported in the neuroepithelium of the *Luzp1* KO mouse  
470 hindbrain, which displays NTD (23). Here, we show aberrant Shh signaling in *Luzp1*<sup>-/-</sup>  
471 cells. Our results might indicate that LUZP1 is therefore pivotal to Shh signaling such  
472 that cranial neural tube closure may be achieved. In addition, Hsu *et. al.* noted that, in  
473 the *Luzp1* KO embryos, exencephaly may be caused by failure in bending at the  
474 dorsolateral hinge point and that the dorsolateral neural folds were convex instead of  
475 the concave morphology observed in WT embryos (23). It has been reported that  
476 changes in apical actin architecture are required for the proper formation of the neural

477 tube (67). Thus, we hypothesize that actin defects may contribute to neural tube defects  
478 observed in *Luzp1* KO mice. Likewise, aberrant primary cilia and Shh signaling might  
479 be present in those mice, both of which are known to interfere with neural tube closure  
480 (68).

481 In addition to NTDs, *Luzp1* knockout mice phenocopy another feature often  
482 associated with human ciliopathies, namely cardiac malformation, which can also occur  
483 in TBS patients (69). TBS cardiac defects include atrial or ventricular septal defect, the  
484 latter of which is seen in *Luzp1* knockout mice. Moreover, compound *Sall1/Sall4* KO  
485 mutant mice exhibit both NTDs and cardiac problems (70). While *Luzp1* and *Sall1* may  
486 both contribute to brain and heart development, a novel crosstalk may arise in TBS due  
487 to dominantly-acting truncated SALL1 that can derail these processes and cause  
488 deformities.

489

490 In conclusion, our data indicate that LUZP1 localizes to actin stress fibers and  
491 to the centrosome, where it may act as a cilia suppressor (Figure 8D). Upon starvation,  
492 overall LUZP1 levels are diminished in both structures, which facilitates the formation  
493 of the primary cilia. Starved control cells appear similar to fed TBS cells, in which a  
494 truncated form of SALL1 localizes to the cytoplasm, interacting with LUZP1 and  
495 enhancing its degradation. As a result, the frequency of cilia formation increases, and  
496 cilia are longer than in control cells. Our findings point to the intriguing possibility that  
497 LUZP1 might be a key relay switch between the actin cytoskeleton and cilia regulation  
498 and along with other factors, might contribute to the phenotypes observed in TBS.

499

## 500 MATERIALS AND METHODS

501

## 502 **Cell culture**

503 TBS-derived primary fibroblasts, U2OS, HEK 293FT (Invitrogen), and mouse  
504 Shh-LIGHT2 cells (37) were cultured at 37°C and 5% CO<sub>2</sub> in Dulbecco's modified  
505 Eagle medium (DMEM) supplemented with 10% foetal bovine serum (FBS, Gibco)  
506 and 1% penicillin/streptomycin (Gibco). Human telomerase reverse transcriptase  
507 immortalized retinal pigment epithelial cells (TERT-RPE1, ATCC CRL-4000) were  
508 cultured in DMEM:F12 (Gibco) supplemented with 10% FBS and 1% penicillin and  
509 streptomycin. Dermal fibroblasts carrying the *SALL1* pathogenic variant c.826C>T  
510 (*SALL1*<sup>c.826C>T</sup>), that produce a truncated protein p.Leu275\* (*SALL1*<sup>275</sup>), were derived  
511 from a male TBS individual UKTBS#3 (called here TBS<sup>275</sup>) (18). Adult female dermal  
512 fibroblasts (ESCTRL#2) from healthy donors were used as controls. Cultured cells  
513 were maintained between 10 and 20 passages, tested for senescence by  $\gamma$ -H2AX  
514 staining, and grown until confluence (6-well plates for RNA extraction and Western  
515 blot assays; 10 cm dishes for pulldowns). The use of human samples in this study was  
516 approved by the institutional review board (Ethics Committee at CIC bioGUNE) and  
517 appropriate informed consent was obtained from human subjects or their parents.

518

## 519 **Cell synchronization and drug treatment**

520 hTERT RPE-1 cells (RPE-1) were arrested in G1 phase by treatment with  
521 mimosine (Sigma, 400  $\mu$ M) for 24 hours. For S phase arrest, cells were subjected to  
522 thymidine treatment (Sigma, 2.5 mM) for 16 hours, followed by release for 8 hours,  
523 and subsequently blocked again for 16 hours. For G2/M phase arrest, cells were treated  
524 with RO-3306 (Sigma, 10  $\mu$ M) for 20 hours. For entering G0 phase and induce primary  
525 cilia formation, cells were starved for 24 hours (DMEM, 0% FBS, 1% penicillin and  
526 streptomycin). Cells were treated with the proteasome inhibitor MG132 (Calbiochem,

527 5  $\mu$ M) for 15 hours and with Cytochalasin D (Sigma, 10  $\mu$ M) for 10 minutes to stimulate  
528 actin depolymerization. HEK 293FT cells were transfected using calcium phosphate  
529 method and U2OS cells using Effectene Transfection Reagent (Qiagen). To induce  
530 primary cilia, cells were starved for at least 24 hours (DMEM, 0% FBS, 1% penicillin  
531 and streptomycin).

532

### 533 **CRISPR-Cas9 genome editing**

534 CRISPR-Cas9 targeting of *SALL1* locus was performed to generate a HEK 293FT cell  
535 line carrying a TBS-like allele (18). The mouse *Luzp1* locus was targeted in NIH3T3-  
536 based Shh-LIGHT2 fibroblasts (37) (kind gift of A. McGee, Imperial College). These  
537 are NIH3T3 mouse fibroblasts that carry an incorporated Shh reporter (firefly luciferase  
538 under control of *Gli3*-responsive promoter). Cas9 was introduced into Shh-LIGHT2  
539 cells by lentiviral transduction (Lenti-Cas9-blast; Addgene #52962; kind gift of F.  
540 Zhang, MIT) and selection with blasticidin (5  $\mu$ g/ml). Two high-scoring sgRNAs were  
541 selected (<http://crispr.mit.edu/>) to target near the initiation codon (sg2: 5'-  
542 CTTAAATCGCAGGTGGCGGT\_TGG-3'; sg3: 5'-  
543 CTTCAATCTTCAGTACCCGC\_TGG-3'). These sequences were cloned into px459  
544 2.0 (Addgene #62988; kind gift of F. Zhang, MIT), for expressing both sgRNAs and  
545 additional Cas9 with puromycin selection. Transfections were performed in Shh-  
546 LIGHT2/Cas9 cells with Lipofectamine 3000 (Thermo). 24 hours after transfection,  
547 transient puromycin selection (0.5  $\mu$ g/ml) was applied for 48 hours to enrich for  
548 transfected cells. Cells were plated at clonal density, and well-isolated clones were  
549 picked and propagated individually. Western blotting was used to identify clones  
550 lacking *Luzp1* expression. Further propagation of a selected clone (#6) was carried out  
551 with G418 (0.4 mg/ml) and zeocin (0.15 mg/ml) selection to maintain expression of

552 luciferase reporters. Genotyping was performed using genomic PCR  
553 (*MmLuzp1\_geno\_for*: 5'-GTTGCCAAAGAAGGTTGTGGATGCC-3';  
554 *MmLuzp1\_geno\_rev*: 5'-CGTAAGGTTTTCTTCCTCTTCAAGTTTCTC-3') and  
555 revealed a homozygous deletion of bases between the two sgRNA target sites, predicting  
556 a frame-shifted truncated protein (MAELTNYKDAASNR\*), and resulting in a null  
557 *Luzp1* allele. A rescue cell line was generated by transducing Shh-LIGHT2 *Luzp1* KO  
558 clone #6 with a lentiviral expression vector carrying EFS-LUZP1-YFP-P2A-blast<sup>R</sup>, with  
559 a positive population selected by fluorescence-activated cell sorting.

560

### 561 **Plasmid construction**

562 *SALL1* truncated (*SALL1*<sup>275</sup>-YFP or Myc-BirA\*-*SALL1*<sup>275</sup>) and FL versions (*SALL1*<sup>FL</sup>-  
563 YFP, *SALL1*<sup>FL</sup>-2xHA or Myc-BirA\*-*SALL1*<sup>FL</sup>) were previously described (18). To  
564 identify bio-ubiquitin conjugates, human *LUZP1* ORF was amplified by high-fidelity  
565 PCR (Platinum SuperFi; Thermo) from hTERT-RPE1 cDNA and cloned to generate  
566 *CB6-GFP-LUZP1*. This was used as a source clone to generate additional variants  
567 (*CMV-LUZP1-YFP*, *Myc-TurboID-LUZP1*). The LUZP1-YFP and TurboID-LUZP1  
568 lentiviral expression vectors were generated by replacing Cas9 in Lenti-Cas9-blast  
569 (Addgene #52962). All constructs were verified by Sanger sequencing. Plasmids *CAG*-  
570 *BioUBC(x4)\_BirA\_V5\_puro* (called here BioUb) and *CAG-BirA-puro* (called here  
571 BirA) were reported previously (44).

572

### 573 **Biotin pulldowns**

574 Using the BioID and the TurboID methods (33, 71), proteins in close proximity to  
575 *SALL1* and *LUZP1*, respectively, were biotinylated and isolated by streptavidin-bead  
576 pulldowns. *Myc-BirA\*-SALL1*<sup>c.826C>T</sup>, *Myc-BirA\*-SALL1*<sup>FL</sup> or *Myc-TurboID-LUZP1*

577 were transfected in HEK 293FT cells (10 cm dishes). For the isolation of BioUb-  
578 conjugates 10 cm dishes were transfected with BioUb or BirA as control, according to  
579 (Pirone et al 2016). Briefly, 24 hours after transfection, medium was supplemented with  
580 biotin at 50  $\mu$ M. Cells were collected 48 hours after transfection, washed 3 times on ice  
581 with cold phosphate buffered saline (PBS) and scraped in lysis buffer [8 M urea, 1%  
582 SDS, 1x protease inhibitor cocktail (Roche), 60  $\mu$ M NEM in 1x PBS; 1 ml per 10 cm  
583 dish]. At room temperature, samples were sonicated and cleared by centrifugation. Cell  
584 lysates were incubated overnight with 40  $\mu$ l of equilibrated NeutrAvidin-agarose beads  
585 (Thermo Scientific). Beads were subjected to stringent washes using the following  
586 washing buffers (WB), all prepared in PBS: WB1 (8 M urea, 0.25% SDS); WB2 (6 M  
587 Guanidine-HCl); WB3 (6.4 M urea, 1 M NaCl, 0.2% SDS), WB4 (4 M urea, 1 M NaCl,  
588 10% isopropanol, 10% ethanol and 0.2% SDS); WB5 (8 M urea, 1% SDS); and WB6  
589 (2% SDS). For elution of biotinylated proteins, beads were heated at 99°C in 50  $\mu$ l of  
590 Elution Buffer (4x Laemmli buffer, 100 mM DTT). Beads were separated by  
591 centrifugation (18000 x g, 5 minutes).

592

### 593 **Lentiviral transduction**

594 Lentiviral expression constructs were packaged using psPAX2 and pVSV-G  
595 (Addgene) in HEK 293FT cells, and lentiviral supernatants were used to transduce Shh-  
596 LIGHT2 cells. Stable-expressing populations were selected using puromycin (1  $\mu$ g/ml)  
597 or blasticidin (5  $\mu$ g/ml). Lentiviral supernatants were concentrated 100-fold before use  
598 (Lenti-X concentrator, Clontech). Concentrated virus was used for transducing primary  
599 fibroblasts and hTERT-RPE1 cells.

600

### 601 **Mass spectrometry**



602 Analysis was done in hTERT-RPE1 cells stably expressing TurboID-LUZP1 at  
603 near endogenous levels. Three independent pulldown experiments ( $1 \times 10^7$  cells per  
604 replicate) were analyzed by MS. Samples eluted from the NeutrAvidin beads were  
605 separated in SDS-PAGE (50% loaded) and stained with Sypro-Ruby (Biorad)  
606 according to manufacturer's instructions. Entire gel lanes were excised, divided into  
607 pieces and in-gel digested with trypsin. Recovered peptides were desalted using stage-  
608 tip C18 microcolumns (Zip-tip, Millipore) and resuspended in 0.1% FA prior to MS  
609 analysis. In this study, samples (33%) were loaded onto a nanoElute liquid  
610 chromatograph (Bruker) at 300 nl/min and using a 15 min linear gradient of 3–45%  
611 acetonitrile, coupled on-line to a TIMS TOF Pro mass spectrometer using PASEF  
612 (Bruker Daltonics) (72). Data was processed by Data Analysis v3.0 (Bruker) and  
613 searches were carried out by Mascot (MatrixScience). Applied search parameters were:  
614 50 ppm precursor ion tolerance and 0.05 Da for fragment ions; Carbamidomethylation  
615 as fixed and methionine oxidation as variable modifications; up to two missed  
616 cleavages. Database search was performed against UNIPROT database (December  
617 2018) containing only *Homo sapiens* entries.

618 Protein IDs were ranked according to the number of peptides found and their  
619 corresponding intensities. Gene ontology (GO) term enrichment was analyzed using  
620 g:GOST Profiler, a tool integrated in the g:Profiler web server (73). GO enrichment was  
621 obtained by calculating  $-\log_{10}$  of the P-value.

622

### 623 **GFP-trap pulldowns**

624 All steps were performed at 4°C. HEK 293FT transfected cells were collected  
625 after 48 hours, washed 3 times with 1x PBS and lysed in 1 ml of lysis buffer [25 mM  
626 Tris-HCl pH 7.5, 150 mM NaCl, 1 mM EDTA, 1% NP-40, 0.5% Triton X-100, 5%

627 glycerol, protease inhibitors (Roche)]. Lysates were kept on ice for 30 minutes  
628 vortexing every 5 minutes and spun down at 25,000 x g for 20 minutes. After saving  
629 40 µl of supernatant (input), the rest was incubated overnight with 30 µl of pre-washed  
630 GFP-Trap resin (Chromotek) in a rotating wheel. Beads were washed 5 times for 5  
631 minutes each with WB (25 mM Tris-HCl pH 7.5, 300 mM NaCl, 1 mM EDTA, 1%  
632 NP-40, 0.5% Triton X-100, 5% glycerol). Beads were centrifuged at 2,000 x g for 2  
633 minutes after each wash. For elution, samples were boiled for 5 minutes at 95°C in 2x  
634 Laemmli buffer.

635

### 636 **Immunoprecipitation**

637 All steps were performed at 4°C. Cells were collected and lysates were  
638 processed as described for GFP-trap pulldowns. After saving 40 µl of supernatant  
639 (input), the rest was incubated overnight with 1 µg of anti-CEP97 antibody  
640 (Proteintech), or anti-LUZP1 antibody (Sigma) and for additional 4 hours with 40 µl of  
641 pre-washed Protein G Sepharose 4 Fast Flow beads (GE Healthcare) in a rotating wheel.  
642 Beads were washed 5 times for 5 minutes each with WB (10 mM Tris-HCl pH 7.5, 137  
643 mM NaCl, 1 mM EDTA, 1% Triton X-100). Beads were centrifuged at 2,000 x g for 2  
644 minutes after each wash. For elution, samples were boiled for 5 minutes at 95°C in 2x  
645 Laemmli buffer.

646

### 647 **Western blot analysis**

648 Cells were lysed in cold RIPA buffer (Cell Signaling Technology), WB5 (8 M  
649 urea, 1% SDS) or weak buffer (10 mM PIPES pH 6.8, 100 mM NaCl, 1 mM EGTA, 3  
650 mM MgCl<sub>2</sub>, 300 mM sucrose, 0.5 mM DTT, 1% Triton X-100) supplemented with 1x  
651 protease inhibitor cocktail (Roche), and also in some cases with PhosphoStop 1x

652 (Roche). Lysates were kept on ice for 30 minutes vortexing every 5 minutes and then  
653 cleared by centrifugation (25,000 x g, 20 minutes, 4°C). Supernatants were collected  
654 and protein content was quantified by BCA protein quantification assay (Pierce). After  
655 SDS-PAGE and transfer to nitrocellulose membranes, blocking was performed in 5%  
656 milk, or in 5% BSA (Bovine Serum Albumin, Fraction V, Sigma) in PBT (1x PBS,  
657 0.1% Tween-20). In general, primary antibodies were incubated overnight at 4°C and  
658 secondary antibodies for 1 hour at room temperature (RT). Antibodies used: anti-  
659 LUZP1 (Sigma, 1:1,000), anti-LUZP1 (Proteintech, 1:1,000), anti-CCP110  
660 (Proteintech, 1:1,000), anti-CEP97 (Proteintech, 1:1,000), anti-GFP (Roche, 1:1,000),  
661 anti-GAPDH (Proteintech, 1:1,000), anti-FLNA (Merck, 1:1,000), anti-GLI3 (R&D,  
662 1:1,000), HRP-conjugated anti-biotin (Cell Signaling, 1:2,000), anti Myc (Cell  
663 Signaling, 1:2,000), anti-actin (Sigma, 1:1,000) and anti-SALL1 (R&D, 1:1,000).  
664 Secondary antibodies were anti-goat, anti-mouse or anti-rabbit HRP-conjugates  
665 (Jackson Immunoresearch). Proteins were detected using Clarity ECL (BioRad) or  
666 Super Signal West Femto (Pierce). Quantification of bands was performed using  
667 ImageJ software and normalized against GAPDH or actin levels. At least three  
668 independent blots were quantified per experiment.

669

## 670 **Immunostaining**

671 Shh-LIGHT2 cells, hTERT-RPE1, U2OS cells and primary fibroblasts from  
672 control and TBS individuals were seeded on 11 mm coverslips (15,000-25,000 cells per  
673 well; 24 well-plate). After washing 3 times with cold 1xPBS, cells were fixed with  
674 methanol 100% for 10 minutes at -20°C or with 4% PFA supplemented with 0.1%  
675 Triton X-100 in PBS for 15 minutes at RT. Then, coverslips were washed 3 times with  
676 1x PBS. Blocking was performed for 1 hour at 37°C in blocking buffer (BB: 2% foetal

677 calf serum, 1% BSA in 1x PBS). Primary antibodies were incubated overnight at 4°C  
678 and cells were washed with 1x PBS 3 times. To label the ciliary axoneme and the basal  
679 body/pericentriolar region, we used mouse antibodies against acetylated alpha-tubulin  
680 (Santa Cruz Biotechnologies, 1:160) and gamma-tubulin (Proteintech, 1:160). Other  
681 antibodies include, anti Centrin-2 (CETN2, Biolegend, 1:160), anti-LUZP1 (Sigma,  
682 1:100), anti-LUZP1 (Proteintech, 1:100), anti-CCP110 (Proteintech, 1:200), anti-ODF2  
683 (Atlas, 1:100), anti-PCM-1 (Cell Signaling, 1:100) and anti-Centrobilin (Genetex, 1:100).  
684 Donkey anti rat, anti-mouse or anti-rabbit secondary antibodies (Jackson  
685 Immunoresearch) conjugated to Alexa 488 or Alexa 568 (1:200), GFP booster  
686 (Chromotek, 1:500) and Alexa 568-conjugated phalloidin (Invitrogen 1:500), were  
687 incubated for 1 hour at 37°C, followed by nuclear staining with DAPI (10 minutes, 300  
688 ng/ml in PBS; Sigma). Fluorescence imaging was performed using an upright  
689 fluorescent microscope (Axioimager D1, Zeiss) or super-resolution microscopy (Leica  
690 SP8 Lightning and Zeiss LSM 880 Fast Airyscan) with 63x Plan ApoChromat NA1.4.  
691 For cilia measurements and counting, primary cilia from at least fifteen different  
692 fluorescent micrographs taken for each experimental condition were analyzed using the  
693 ruler tool from Adobe Photoshop. Cilia frequency was obtained dividing the number of  
694 total cilia by the number of nuclei on each micrograph. Number of cells per micrograph  
695 was similar in both TBS and control fibroblasts. To estimate the level of fluorescence  
696 in a determined region, we used the mean intensity obtained by ImageJ. To obtain the  
697 signal histograms on Figure 2F, we used the plot profile tool in FIJI.

698

### 699 **qPCR analysis**

700 TBS<sup>275</sup>, control fibroblasts, and Shh-LIGHT2 cells were starved for 24 hours  
701 with or without purmorphamine treatment (5 μM; ChemCruz) during 24 hours to

702 induce Shh signaling pathway. Total RNA was obtained with EZNA Total RNA Kit  
703 (Omega) and quantified by Nanodrop spectrophotometer. cDNAs were prepared using  
704 the SuperScript III First-Strand Synthesis System (Invitrogen) in 10 µl volume per  
705 reaction. *LUZP1*, *GAPDH*, *Gli1*, *Ptch1*, and *Rplp0* primers were tested for efficiency  
706 and products checked for correct size before being used in test samples. qPCR was done  
707 using PerfeCTa SYBR Green SuperMix Low (Quantabio). Reactions were performed  
708 in 10 µl, adding 1 µl of cDNA and 0.5 µl of each primer (10 µM), in a CFX96  
709 thermocycler (BioRad) using the following protocol: 95°C for 10 minutes and 40 cycles  
710 of 95°C for 10 seconds and 55-60°C for 30 seconds. Melting curve analysis was  
711 performed for each pair of primers between 65°C and 95°C, with 0.5°C temperature  
712 increments every 5 seconds. Relative gene expression data were analyzed using the  
713  $\Delta\Delta C_t$  method. Reactions were done in triplicates and results were derived from at least  
714 three independent experiments normalized to *GAPDH* and *Rplp0* and presented as  
715 relative expression levels. Primer sequences: *LUZP1-F*: 5'-  
716 GGAATCGGGTAGGAGACACCA-3'; *LUZP1-R*: 5'-  
717 TTCCCAGGCAGTTCAGACGGA-3; *GAPDH-F*: 5'-  
718 AGCCACATCGCTCAGACAC-3'; *GAPDH-R*: 5'-GCCCAATACGACCAAATCC-  
719 3'; *Gli1-F*: 5'-AGCCTTCAGCAATGCCAGTGAC-3'; *Gli1-R*: 5'-  
720 GTCAGGACCATGCACTGTCTTG-3'; *Ptch1-F*: 5'-  
721 AAGCCGACTACATGCCAGAG-3'; *Ptch1-R*: 5'-  
722 TGATGCCATCTGCGTCTACCAG-3', *Rplp0-F*: 5'-  
723 ACTGGTCTAGGACCCGAGAAG-3'; *Rplp0-R*: 5'-CTCCCACCTTGTCTCCAGTC-  
724 3'.

725

726 **Luciferase assays**

727 Firefly luciferase expression was measured using the Dual-Luciferase Reporter  
728 Assay System (Promega) according to the manufacturer's instructions. Luminescence  
729 was measured and data were normalized to the Renilla luciferase readout. For each  
730 construct, luciferase activity upon purmorphamine treatment was divided by the  
731 activity of cells before treatment to obtain the fold change value. Experiments were  
732 performed with both biological (3x) and technical replicates (n=6).

733

#### 734 **Statistical analysis**

735 Statistical analysis was performed using GraphPad 6.0 software. Data were  
736 analyzed by Shapiro-Wilk normality test and Levene's test of variance. We used two-  
737 tailed unpaired Student's t-test or Mann Whitney-U tests for comparing two groups,  
738 One-way ANOVA or Kruskal-Wallis and the corresponding post-hoc tests for more  
739 than two groups and two-way ANOVA to compare more than one variable in more than  
740 two groups. P values were represented by asterisks as follows: (\*) P-value < 0.05; (\*\*)  
741 P-value < 0.01; (\*\*\*) P-value < 0.001; (\*\*\*\*) P-value < 0.0001. Differences were  
742 considered significant when  $P < 0.05$ .

743

#### 744 **DATA AVAILABILITY**

745 The data that support the findings of this study are available from the  
746 corresponding author upon reasonable request.

747

#### 748 **ACKNOWLEDGEMENTS**

749 We acknowledge A. Cenigaonandia for her assistance in the experiments. We are  
750 grateful to the Fundación Inocente, Inocente for their support. We thank the Servicio  
751 General de Microscopía Analítica y de Alta Resolución en Biomedicina, SGIker at the  
752 UPV/EHU. We also acknowledge funding by grants BFU2017-84653-P

753 (MINECO/FEDER, EU), SEV-2016-0644 (Severo Ochoa Excellence Program),  
754 765445-EU (UbiCODE Program), SAF2017-90900-REDT (UBIRed Program), and  
755 IT634-13 (Basque Country Government). Additional support was provided by the  
756 Department of Industry, Tourism, and Trade of the Basque Country Government  
757 (Elkartek Research Programs) and by the Innovation Technology Department of the  
758 Bizkaia County. FE is at Proteomics Platform, member of ProteoRed-ISCI  
759 (PT13/0001/0027) and CIBERehd.

760

## 761 **Contributions**

762

763 L.B.-B., J.D.S. and R.B. designed experiments, analyzed data and wrote the  
764 manuscript. L.B.-B., M.G.-S., A.B.-A., C.D., N.M.-M., F.E. and J.D.S. developed  
765 experimental protocols, performed experiments, and analyzed data. O.P., R.A.  
766 T.C.B., A.Y.T., A.C. and J.A.R. provided scientific resources.

767

## 768 **Competing Interests**

769 The authors declare no competing interests.

770

## 771 **REFERENCES**

- 772 1. Goetz SC, Anderson KV. The primary cilium: a signalling centre during vertebrate  
773 development. *Nat Rev Genet.* 2010;11(5):331-44. 10.1038/nrg2774I.
- 774 2. Rezakova L, Kraatz SH, Akhmanova A, Steinmetz MO, Kammerer RA.  
775 Biophysical and Structural Characterization of the Centriolar Protein Cep104  
776 Interaction Network. *J Biol Chem.* 2016;291(35):18496-504.  
777 10.1074/jbc.M116.739771I.
- 778 3. Conduit PT, Wainman A, Raff JW. Centrosome function and assembly in animal  
779 cells. *Nat Rev Mol Cell Biol.* 2015;16(10):611-24. 10.1038/nrm4062I.
- 780 4. Vertii A, Hehny H, Doxsey S. The Centrosome, a Multitalented Renaissance  
781 Organelle. *Cold Spring Harb Perspect Biol.* 2016;8(12).  
782 10.1101/cshperspect.a025049I.
- 783 5. Fu J, Glover DM. Structured illumination of the interface between centriole and  
784 peri-centriolar material. *Open Biol.* 2012;2(8):120104. 10.1098/rsob.120104I.

- 785 6. Lawo S, Hasegan M, Gupta GD, Pelletier L. Subdiffraction imaging of  
786 centrosomes reveals higher-order organizational features of pericentriolar material.  
787 *Nat Cell Biol.* 2012;14(11):1148-58. 10.1038/ncb2591I.
- 788 7. Mennella V, Keszthelyi B, McDonald KL, Chhun B, Kan F, Rogers GC, et al.  
789 Subdiffraction-resolution fluorescence microscopy reveals a domain of the  
790 centrosome critical for pericentriolar material organization. *Nat Cell Biol.*  
791 2012;14(11):1159-68. 10.1038/ncb2597I.
- 792 8. Sonnen KF, Schermelleh L, Leonhardt H, Nigg EA. 3D-structured illumination  
793 microscopy provides novel insight into architecture of human centrosomes. *Biol*  
794 *Open.* 2012;1(10):965-76. 10.1242/bio.20122337I.
- 795 9. Kim TS, Zhang L, Il Ahn J, Meng L, Chen Y, Lee E, et al. Molecular architecture  
796 of a cylindrical self-assembly at human centrosomes. *Nat Commun.*  
797 2019;10(1):1151. 10.1038/s41467-019-08838-2I.
- 798 10. Gonczy P. Centrosomes and cancer: revisiting a long-standing relationship. *Nat*  
799 *Rev Cancer.* 2015;15(11):639-52. 10.1038/nrc3995I.
- 800 11. Nigg EA, Holland AJ. Once and only once: mechanisms of centriole duplication  
801 and their deregulation in disease. *Nat Rev Mol Cell Biol.* 2018;19(5):297-312.  
802 10.1038/nrm.2017.127I.
- 803 12. Spektor A, Tsang WY, Khoo D, Dynlacht BD. Cep97 and CP110 suppress a cilia  
804 assembly program. *Cell.* 2007;130(4):678-90. 10.1016/j.cell.2007.06.027I.
- 805 13. Pitaval A, Tseng Q, Bornens M, Theyry M. Cell shape and contractility regulate  
806 ciliogenesis in cell cycle-arrested cells. *J Cell Biol.* 2010;191(2):303-12.  
807 10.1083/jcb.201004003I.
- 808 14. Fliegauf M, Benzing T, Omran H. When cilia go bad: cilia defects and ciliopathies.  
809 *Nat Rev Mol Cell Biol.* 2007;8(11):880-93. 10.1038/nrm2278I.
- 810 15. Hildebrandt F, Benzing T, Katsanis N. Ciliopathies. *N Engl J Med.*  
811 2011;364(16):1533-43. 10.1056/NEJMra1010172I.
- 812 16. Botzenhart EM, Bartalini G, Blair E, Brady AF, Elmslie F, Chong KL, et al.  
813 Townes-Brocks syndrome: twenty novel SALL1 mutations in sporadic and  
814 familial cases and refinement of the SALL1 hot spot region. *Hum Mutat.*  
815 2007;28(2):204-5. 10.1002/humu.9476I.
- 816 17. Kohlhase J, Wischermann A, Reichenbach H, Froster U, Engel W. Mutations in  
817 the SALL1 putative transcription factor gene cause Townes-Brocks syndrome. *Nat*  
818 *Genet.* 1998;18(1):81-3. 10.1038/ng0198-81I.
- 819 18. Bozal-Basterra L, Martin-Ruiz I, Pirone L, Liang Y, Sigurethsson JO, Gonzalez-  
820 Santamarta M, et al. Truncated SALL1 Impedes Primary Cilia Function in  
821 Townes-Brocks Syndrome. *Am J Hum Genet.* 2018;102(2):249-65.  
822 10.1016/j.ajhg.2017.12.017I.
- 823 19. Wang J, Nakamura F. Identification of Filamin A Mechanobinding Partner II:  
824 Fimbacin Is a Novel Actin Cross-Linking and Filamin A Binding Protein.  
825 *Biochemistry.* 2019. 10.1021/acs.biochem.9b00101I.
- 826 20. Hein MY, Hubner NC, Poser I, Cox J, Nagaraj N, Toyoda Y, et al. A human  
827 interactome in three quantitative dimensions organized by stoichiometries and  
828 abundances. *Cell.* 2015;163(3):712-23. 10.1016/j.cell.2015.09.053I.
- 829 21. Nagano T, Morikubo S, Sato M. Filamin A and FILIP (Filamin A-Interacting  
830 Protein) regulate cell polarity and motility in neocortical subventricular and  
831 intermediate zones during radial migration. *J Neurosci.* 2004;24(43):9648-57.  
832 10.1523/JNEUROSCI.2363-04.2004I.
- 833 22. Gad AK, Nehru V, Ruusala A, Aspenstrom P. RhoD regulates cytoskeletal  
834 dynamics via the actin nucleation-promoting factor WASp homologue associated



- 835 with actin Golgi membranes and microtubules. *Mol Biol Cell*. 2012;23(24):4807-  
836 19. 10.1091/mbc.E12-07-0555I.
- 837 23. Hsu CY, Chang NC, Lee MW, Lee KH, Sun DS, Lai C, et al. LUZP deficiency  
838 affects neural tube closure during brain development. *Biochem Biophys Res*  
839 *Commun*. 2008;376(3):466-71. 10.1016/j.bbrc.2008.08.170I.
- 840 24. Botzenhart EM, Green A, Ilyina H, Konig R, Lowry RB, Lo IF, et al. SALL1  
841 mutation analysis in Townes-Brocks syndrome: twelve novel mutations and  
842 expansion of the phenotype. *Hum Mutat*. 2005;26(3):282. 10.1002/humu.9362I.
- 843 25. Surka WS, Kohlhase J, Neunert CE, Schneider DS, Proud VK. Unique family with  
844 Townes-Brocks syndrome, SALL1 mutation, and cardiac defects. *Am J Med Genet*.  
845 2001;102(3):250-7.
- 846 26. Klena N, Gabriel G, Liu X, Yagi H, Li Y, Chen Y, et al. Role of Cilia and Left-  
847 Right Patterning in Congenital Heart Disease. In: Nakanishi T, Markwald RR,  
848 Baldwin HS, Keller BB, Srivastava D, Yamagishi H, editors. *Etiology and*  
849 *Morphogenesis of Congenital Heart Disease: From Gene Function and Cellular*  
850 *Interaction to Morphology*. Tokyo2016. p. 67-79.
- 851 27. Toomer KA, Yu M, Fulmer D, Guo L, Moore KS, Moore R, et al. Primary cilia  
852 defects causing mitral valve prolapse. *Sci Transl Med*. 2019;11(493).  
853 10.1126/scitranslmed.aax0290I.
- 854 28. Lee MW, Chang AC, Sun DS, Hsu CY, Chang NC. Restricted expression of LUZP  
855 in neural lineage cells: a study in embryonic stem cells. *J Biomed Sci*.  
856 2001;8(6):504-11. 10.1159/000046172I.
- 857 29. Sun DS, Chang AC, Jenkins NA, Gilbert DJ, Copeland NG, Chang NC.  
858 Identification, molecular characterization, and chromosomal localization of the  
859 cDNA encoding a novel leucine zipper motif-containing protein. *Genomics*.  
860 1996;36(1):54-62. 10.1006/geno.1996.0425I.
- 861 30. Campbell K. Dorsal-ventral patterning in the mammalian telencephalon. *Curr Opin*  
862 *Neurobiol*. 2003;13(1):50-6.
- 863 31. Copp AJ. Neurulation in the cranial region--normal and abnormal. *J Anat*.  
864 2005;207(5):623-35. 10.1111/j.1469-7580.2005.00476.xI.
- 865 32. Fuccillo M, Joyner AL, Fishell G. Morphogen to mitogen: the multiple roles of  
866 hedgehog signalling in vertebrate neural development. *Nat Rev Neurosci*.  
867 2006;7(10):772-83. 10.1038/nrn1990I.
- 868 33. Branon TC, Bosch JA, Sanchez AD, Udeshi ND, Svinkina T, Carr SA, et al.  
869 Efficient proximity labeling in living cells and organisms with TurboID. *Nat*  
870 *Biotechnol*. 2018;36(9):880-7. 10.1038/nbt.4201I.
- 871 34. Alves-Cruzeiro JM, Nogales-Cadenas R, Pascual-Montano AD. CentrosomeDB: a  
872 new generation of the centrosomal proteins database for Human and *Drosophila*  
873 *melanogaster*. *Nucleic Acids Res*. 2014;42(Database issue):D430-6.  
874 10.1093/nar/gkt1126I.
- 875 35. Gupta GD, Coyaud E, Goncalves J, Mojarad BA, Liu Y, Wu Q, et al. A Dynamic  
876 Protein Interaction Landscape of the Human Centrosome-Cilium Interface. *Cell*.  
877 2015;163(6):1484-99. 10.1016/j.cell.2015.10.065I.
- 878 36. Uhlen M, Fagerberg L, Hallstrom BM, Lindskog C, Oksvold P, Mardinoglu A, et  
879 al. Proteomics. Tissue-based map of the human proteome. *Science*.  
880 2015;347(6220):1260419. 10.1126/science.1260419I.
- 881 37. Taipale J, Chen JK, Cooper MK, Wang B, Mann RK, Milenkovic L, et al. Effects  
882 of oncogenic mutations in Smoothed and Patched can be reversed by  
883 cyclopamine. *Nature*. 2000;406(6799):1005-9. 10.1038/35023008I.

- 884 38. Goetz SC, Liem KF, Jr., Anderson KV. The spinocerebellar ataxia-associated gene  
885 Tau tubulin kinase 2 controls the initiation of ciliogenesis. *Cell*. 2012;151(4):847-  
886 58. 10.1016/j.cell.2012.10.010I.
- 887 39. Kleylein-Sohn J, Westendorf J, Le Clech M, Habedanck R, Stierhof YD, Nigg EA.  
888 Plk4-induced centriole biogenesis in human cells. *Dev Cell*. 2007;13(2):190-202.  
889 10.1016/j.devcel.2007.07.002I.
- 890 40. Prosser SL, Morrison CG. Centrin2 regulates CP110 removal in primary cilium  
891 formation. *J Cell Biol*. 2015;208(6):693-701. 10.1083/jcb.201411070I.
- 892 41. Tsang WY, Bossard C, Khanna H, Peranen J, Swaroop A, Malhotra V, et al. CP110  
893 suppresses primary cilia formation through its interaction with CEP290, a protein  
894 deficient in human ciliary disease. *Dev Cell*. 2008;15(2):187-97.  
895 10.1016/j.devcel.2008.07.004I.
- 896 42. Huangfu D, Liu A, Rakeman AS, Murcia NS, Niswander L, Anderson KV.  
897 Hedgehog signalling in the mouse requires intraflagellar transport proteins. *Nature*.  
898 2003;426(6962):83-7. 10.1038/nature02061I.
- 899 43. Yin Y, Bangs F, Paton IR, Prescott A, James J, Davey MG, et al. The Talpid3 gene  
900 (KIAA0586) encodes a centrosomal protein that is essential for primary cilia  
901 formation. *Development*. 2009;136(4):655-64. 10.1242/dev.028464I.
- 902 44. Pirone L, Xolalpa W, Sigurethsson JO, Ramirez J, Perez C, Gonzalez M, et al. A  
903 comprehensive platform for the analysis of ubiquitin-like protein modifications  
904 using in vivo biotinylation. *Sci Rep*. 2017;7:40756. 10.1038/srep40756I.
- 905 45. Gheiratmand L, Coyaud E, Gupta GD, Laurent EM, Hasegan M, Prosser SL, et al.  
906 Spatial and proteomic profiling reveals centrosome-independent features of  
907 centriolar satellites. *EMBO J*. 2019. 10.15252/embj.2018101109I.
- 908 46. Bernabe-Rubio M, Andres G, Casares-Arias J, Fernandez-Barrera J, Rangel L,  
909 Reglero-Real N, et al. Novel role for the midbody in primary ciliogenesis by  
910 polarized epithelial cells. *J Cell Biol*. 2016;214(3):259-73.  
911 10.1083/jcb.201601020I.
- 912 47. Akimov V, Barrio-Hernandez I, Hansen SVF, Hallenborg P, Pedersen AK,  
913 Bekker-Jensen DB, et al. UbiSite approach for comprehensive mapping of lysine  
914 and N-terminal ubiquitination sites. *Nat Struct Mol Biol*. 2018;25(7):631-40.  
915 10.1038/s41594-018-0084-yI.
- 916 48. Mertins P, Qiao JW, Patel J, Udeshi ND, Clauser KR, Mani DR, et al. Integrated  
917 proteomic analysis of post-translational modifications by serial enrichment. *Nat*  
918 *Methods*. 2013;10(7):634-7. 10.1038/nmeth.2518I.
- 919 49. Povlsen LK, Beli P, Wagner SA, Poulsen SL, Sylvestersen KB, Poulsen JW, et al.  
920 Systems-wide analysis of ubiquitylation dynamics reveals a key role for PAF15  
921 ubiquitylation in DNA-damage bypass. *Nat Cell Biol*. 2012;14(10):1089-98.  
922 10.1038/ncb2579I.
- 923 50. Udeshi ND, Svinkina T, Mertins P, Kuhn E, Mani DR, Qiao JW, et al. Refined  
924 preparation and use of anti-diglycine remnant (K-epsilon-GG) antibody enables  
925 routine quantification of 10,000s of ubiquitination sites in single proteomics  
926 experiments. *Mol Cell Proteomics*. 2013;12(3):825-31.  
927 10.1074/mcp.O112.027094I.
- 928 51. Wagner SA, Beli P, Weinert BT, Scholz C, Kelstrup CD, Young C, et al. Proteomic  
929 analyses reveal divergent ubiquitylation site patterns in murine tissues. *Mol Cell*  
930 *Proteomics*. 2012;11(12):1578-85. 10.1074/mcp.M112.017905I.
- 931 52. D'Angiolella V, Donato V, Vijayakumar S, Saraf A, Florens L, Washburn MP, et  
932 al. SCF(Cyclin F) controls centrosome homeostasis and mitotic fidelity through  
933 CP110 degradation. *Nature*. 2010;466(7302):138-42. 10.1038/nature09140I.

- 934 53. Hossain D, Javadi Esfehiani Y, Das A, Tsang WY. Cep78 controls centrosome  
935 homeostasis by inhibiting EDD-DYRK2-DDB1(Vpr)(BP). *EMBO Rep.*  
936 2017;18(4):632-44. 10.15252/embr.201642377I.
- 937 54. Li J, D'Angiolella V, Seeley ES, Kim S, Kobayashi T, Fu W, et al. USP33 regulates  
938 centrosome biogenesis via deubiquitination of the centriolar protein CP110. *Nature.*  
939 2013;495(7440):255-9. 10.1038/nature11941I.
- 940 55. Boisvieux-Ulrich E, Laine MC, Sandoz D. Cytochalasin D inhibits basal body  
941 migration and ciliary elongation in quail oviduct epithelium. *Cell Tissue Res.*  
942 1990;259(3):443-54.
- 943 56. Euteneuer U, Schliwa M. Evidence for an involvement of actin in the positioning  
944 and motility of centrosomes. *J Cell Biol.* 1985;101(1):96-103.
- 945 57. Kim J, Lee JE, Heynen-Genel S, Suyama E, Ono K, Lee K, et al. Functional  
946 genomic screen for modulators of ciliogenesis and cilium length. *Nature.*  
947 2010;464(7291):1048-51. 10.1038/nature08895I.
- 948 58. Kim J, Jo H, Hong H, Kim MH, Kim JM, Lee JK, et al. Actin remodelling factors  
949 control ciliogenesis by regulating YAP/TAZ activity and vesicle trafficking. *Nat*  
950 *Commun.* 2015;6:6781. 10.1038/ncomms7781I.
- 951 59. Kang GM, Han YM, Ko HW, Kim J, Oh BC, Kwon I, et al. Leptin Elongates  
952 Hypothalamic Neuronal Cilia via Transcriptional Regulation and Actin  
953 Destabilization. *J Biol Chem.* 2015;290(29):18146-55. 10.1074/jbc.M115.639468I.
- 954 60. Hernandez-Hernandez V, Pravincumar P, Diaz-Font A, May-Simera H, Jenkins D,  
955 Knight M, et al. Bardet-Biedl syndrome proteins control the cilia length through  
956 regulation of actin polymerization. *Hum Mol Genet.* 2013;22(19):3858-68.  
957 10.1093/hmg/ddt241I.
- 958 61. Drummond ML, Li M, Tarapore E, Nguyen TTL, Barouni BJ, Cruz S, et al. Actin  
959 polymerization controls cilia-mediated signaling. *J Cell Biol.* 2018;217(9):3255-  
960 66. 10.1083/jcb.201703196I.
- 961 62. Cao J, Shen Y, Zhu L, Xu Y, Zhou Y, Wu Z, et al. miR-129-3p controls cilia  
962 assembly by regulating CP110 and actin dynamics. *Nat Cell Biol.* 2012;14(7):697-  
963 706. 10.1038/ncb2512I.
- 964 63. Phua SC, Chiba S, Suzuki M, Su E, Roberson EC, Pusapati GV, et al. Dynamic  
965 Remodeling of Membrane Composition Drives Cell Cycle through Primary Cilia  
966 Excision. *Cell.* 2017;168(1-2):264-79 e15. 10.1016/j.cell.2016.12.032I.
- 967 64. Nager AR, Goldstein JS, Herranz-Perez V, Portran D, Ye F, Garcia-Verdugo JM,  
968 et al. An Actin Network Dispatches Ciliary GPCRs into Extracellular Vesicles to  
969 Modulate Signaling. *Cell.* 2017;168(1-2):252-63 e14. 10.1016/j.cell.2016.11.036I.
- 970 65. Izawa I, Goto H, Kasahara K, Inagaki M. Current topics of functional links  
971 between primary cilia and cell cycle. *Cilia.* 2015;4:12. 10.1186/s13630-015-0021-  
972 1I.
- 973 66. Wallingford JB. Neural tube closure and neural tube defects: studies in animal  
974 models reveal known knowns and known unknowns. *Am J Med Genet C Semin*  
975 *Med Genet.* 2005;135C(1):59-68. 10.1002/ajmg.c.30054I.
- 976 67. Sadler TW, Greenberg D, Coughlin P, Lessard JL. Actin distribution patterns in  
977 the mouse neural tube during neurulation. *Science.* 1982;215(4529):172-4.
- 978 68. Murdoch JN, Copp AJ. The relationship between sonic Hedgehog signaling, cilia,  
979 and neural tube defects. *Birth Defects Res A Clin Mol Teratol.* 2010;88(8):633-52.  
980 10.1002/bdra.20686I.
- 981 69. Kohlhase J. Townes-Brocks Syndrome. In: Pagon RA, Adam MP, Ardinger HH,  
982 Wallace SE, Amemiya A, Bean LJH, et al., editors. *GeneReviews*. Seattle  
983 (WA)2007.

- 984 70. Bohm J, Buck A, Borozdin W, Mannan AU, Matysiak-Scholze U, Adham I, et al.  
985 Sall1, sall2, and sall4 are required for neural tube closure in mice. *Am J Pathol.*  
986 2008;173(5):1455-63. 10.2353/ajpath.2008.071039I.
- 987 71. Roux KJ, Kim DI, Raida M, Burke B. A promiscuous biotin ligase fusion protein  
988 identifies proximal and interacting proteins in mammalian cells. *J Cell Biol.*  
989 2012;196(6):801-10. 10.1083/jcb.201112098I.
- 990 72. Meier F, Beck S, Grassl N, Lubeck M, Park MA, Raether O, et al. Parallel  
991 Accumulation-Serial Fragmentation (PASEF): Multiplying Sequencing Speed and  
992 Sensitivity by Synchronized Scans in a Trapped Ion Mobility Device. *J Proteome*  
993 *Res.* 2015;14(12):5378-87. 10.1021/acs.jproteome.5b00932I.
- 994 73. Reimand J, Arak T, Adler P, Kolberg L, Reisberg S, Peterson H, et al. g:Profiler-a  
995 web server for functional interpretation of gene lists (2016 update). *Nucleic Acids*  
996 *Res.* 2016;44(W1):W83-9. 10.1093/nar/gkw199I.
- 997
- 998

999 **FIGURE LEGENDS**

1000

1001 **Figure 1. Proximity proteomics reveals LUZP1 interacting with truncated SALL1**  
1002 **and with centrosome and actin cytoskeleton-related proteins.** (A) Western blot  
1003 analysis of BioID, biotin pulldown (PD) of HEK 293FT cells transfected with Myc-  
1004 tagged BirA\*-SALL1<sup>275</sup> (BirA\*-SALL1<sup>275</sup>) or BirA\*-SALL1<sup>FL</sup>. Specific antibodies  
1005 (LUZP1, actin, Myc) were used as indicated. Anti-Myc antibody detected the self-  
1006 biotinylated form of BirA\*-SALL1<sup>FL</sup> (asterisk) or BirA\*-SALL1<sup>275</sup> (black arrowhead).  
1007 (B) Western blot of inputs or GFP-Trap pulldowns performed in HEK 293FT cells  
1008 transfected with *SALL1*<sup>275</sup>-YFP (lanes 1 and 6), *SALL1*<sup>FL</sup>-YFP (lanes 2 and 7), YFP  
1009 alone (lanes 3 and 8), *SALL1*<sup>275</sup>-YFP together with *SALL1*<sup>FL</sup>-2xHA (*SALL1*<sup>FL</sup>-HA;  
1010 lanes 4 and 9) or *SALL1*<sup>FL</sup>-HA together with YFP alone (lanes 5 and 10). Specific  
1011 antibodies (LUZP1, actin, SALL1) were used as indicated. Numbers under LUZP1  
1012 panel result from dividing band intensities of each pulldown by their respective input  
1013 levels. One asterisk indicates BirA\*-SALL1<sup>FL</sup> or *SALL1*<sup>FL</sup>-YFP, one black arrowhead  
1014 *SALL1*<sup>275</sup>-YFP and two black arrowheads YFP alone. Molecular weight markers (kDa)  
1015 are shown to the right. Actin was used as loading control. Blots shown are  
1016 representative of three independent experiments. (C-E) Graphical representation of the  
1017  $-\log_{10}$  of the P-value for each of the represented GO terms of the TurboID performed  
1018 on hTERT-RPE1 stably expressing near endogenous levels of *FLAG-TurboID-LUZP1*:  
1019 Cellular Compartment (C), Biological Process (D) and Molecular Function (E).  
1020 Cytosk.: cytoskeleton; Comp.: complex; Ribonucl.: ribonucleoprotein; Org.:  
1021 organization; MT: microtubules; catab.: catabolism; med.: mediated; Struct. Const. of  
1022 Cytosk: structural constituent of cytoskeleton; Ub: ubiquitin. Pink dotted line represents  
1023 the cutoff of P value <0.01.

1024 The following figure supplement is available for Figure 1:

1025 Figure 1-figure supplement 1. Western blot full pictures for Figure 1.

1026

1027 **Figure 2. LUZP1 localizes to the proximal end of both centrioles. (A, B, C)** 2D  
1028 images of a 3D reconstruction of immunofluorescence micrographs of LUZP1 (green)  
1029 and Centrin-2 (CETN2, blue) in RPE1 cells (A), control fibroblasts (ESCTRL#2) (B)  
1030 or U2OS cells (C). (D) 2D sections of U2OS cells overexpressing GFP-LUZP1 (green)  
1031 stained with antibodies against CCP110 (upper panel, magenta) or ODF2 (lower panel,  
1032 magenta) and CETN2 (blue). (E, G) 3D immunofluorescence micrographs of U2OS  
1033 cells overexpressing LUZP1-YFP (green) stained with antibodies against PCM1 (E) or  
1034 centrin (G) in magenta and CETN2 (blue). Purple lines indicate the orthogonal cuts  
1035 of the confocal z-stacks sections; yellow lines indicate the quantification point in (F)  
1036 and (H). (F, H) Plot profile of the orthogonal section in (E) or (G) showing LUZP1-  
1037 YFP (green), PCM1 or centrin (magenta) and CETN2 (blue) intensities along the  
1038 yellow lines in E and G, from left to right. Schematic representation of LUZP1  
1039 localization at the centrosome was modelled according to their respective micrographs  
1040 in (A-G). Scale bar, 1  $\mu\text{m}$  (A-D) or 0.5  $\mu\text{m}$  (D, E, G). Imaging was performed using  
1041 confocal microscopy (Leica SP8, 63x objective). Lightning software (Leica) was  
1042 applied.

1043 The following figure supplement is available for Figure 2:

1044 Figure 2-figure supplement 1. Centrosomal localization of LUZP1 along the cell cycle.

1045 Figure 2-Supplementary video 1. LUZP1 localization in the centrosome.

1046

1047 **Figure 3. TBS cells show reduction in LUZP1 levels at the centrosome. (A, B)**

1048 Immunofluorescence micrographs of non-starved and starved human-derived control

1049 ESCTRL#2 (A) and TBS<sup>275</sup> fibroblasts (B) stained with antibodies against endogenous  
1050 LUZP1 (green, yellow arrows and arrowheads) and acetylated alpha-tubulin and  
1051 gamma tubulin to simultaneously label the cilia and centrosomes, respectively  
1052 (magenta). Black and white images show the isolated green channel. Note the reduction  
1053 of LUZP1 in starved cells and in TBS<sup>275</sup> compared to control ESCTRL2 fibroblasts.  
1054 Imaging was performed using confocal super-resolution microscopy (Zeiss LSM 880  
1055 Fast Airyscan, 63x objective). AcGT: acetylated and gamma tubulin. Scale bar, 4 μm.  
1056 (C) Western blot of inputs (lines 1 to 4) and GFP-Trap pulldowns (lines 5 to 8)  
1057 performed in WT HEK 293FT cells or in 293<sup>335</sup> *SALL1* mutant cells transfected with  
1058 *LUZP1-YFP* (lanes 1, 3, 5 and 7) or *YFP* alone (lanes 2, 4, 6 and 8). Numbers under  
1059 CCP110 and CEP97 panels result from dividing band intensities of each pulldown by  
1060 their respective input levels. GAPDH was used as loading control. (D, E) Co-  
1061 immunoprecipitation experiments show LUZP1-CCP110 (D) and CEP97-LUZP1 (E)  
1062 interactions. Rabbit IgGs were used as immunoprecipitation controls. GAPDH was  
1063 used as loading and specificity control. In all panels, specific antibodies (LUZP1,  
1064 GAPDH, CCP110, CEP97, GFP) were used as indicated. Blots shown here are  
1065 representative of three independent experiments. Molecular weight markers are shown  
1066 to the right.

1067 The following figure supplement is available for Figure 3:

1068 Figure 3-figure supplement 1. Western blot full pictures for Figure 3.

1069

1070 **Figure 4. Reduction in LUZP1 is linked to F-actin decrease.** (A)

1071 Immunofluorescence micrographs of control ESCTRL#2 and TBS<sup>275</sup> human fibroblasts  
1072 stained with an antibody against endogenous LUZP1 (green), phalloidin to label F-actin  
1073 (magenta), and counterstained with DAPI to label the nuclei (blue). Black and white

1074 images show the single green and magenta channels. Note the overall reduction in  
1075 LUZP1 and F-actin levels in TBS<sup>275</sup> compared to control ESCTRL2 fibroblasts. Scale  
1076 bar, 10  $\mu$ m. Imaging was performed using widefield fluorescence microscopy (Zeiss  
1077 Axioimager D1, 63x objective). **(B, C)** Graphical representation of the LUZP1 **(B)** and  
1078 F-actin **(C)** mean intensities, corresponding to the experiments shown in **(A)**;  $n \geq 6$   
1079 micrographs. Three independent experiments were pooled together. P-values were  
1080 calculated using the unpaired two-tailed Student's test or U- Mann-Whitney test. **(D)**  
1081 Western blot of inputs or GFP-Trap pulldowns performed in HEK 293FT cells  
1082 transfected with *LUZP1-YFP* or *YFP* alone. Anti-GFP antibody detected YFP alone  
1083 (two black arrowheads) and LUZP1-YFP (two white arrowheads). Blots shown here  
1084 are representative of three independent experiments. Molecular weight markers are  
1085 shown to the right. Specific antibodies (LUZP1, GAPDH, CCP110, CEP97, GFP) were  
1086 used as indicated. **(E)** Western blot of total cell lysates of HEK 293FT treated or not  
1087 with Cytochalasin D (CytD) in a mild lysis buffer (TX-100 1%, lanes 1, 2) or a strong  
1088 lysis buffer (WB5, lanes 3, 4). Note the increase in LUZP1 levels upon actin  
1089 polymerization blockage with CytD, exclusively when cells were lysed on 1% TX-100-  
1090 based lysis buffer. GAPDH was used as loading control. In **(D)** and **(E)** panels, specific  
1091 antibodies (LUZP1, GAPDH, actin, FLNA, GFP) were used as indicated. **(F)** Graphical  
1092 representation of LUZP1 vs GAPDH band intensities in **(E)** normalized to lane 1.  
1093 Graphs represent Mean and SEM of three independent experiments. P-value was  
1094 calculated using two tailed unpaired Student's t-test.

1095 The following figure supplement is available for Figure 4:

1096 Figure 4-figure supplement 1. Western blot full pictures for Figure 4.

1097 Figure 4-figure supplement 2. LUZP1 localization at the cytoskeleton along the cell  
1098 cycle.



1099 Figure 4-figure supplement 3. LUZP1 localization at the midbody.

1100

1101 **Figure 5. *Luzp1*<sup>-/-</sup> cells show aberrant cilia frequency and length and reduced F-**

1102 **actin levels. (A)** Micrographs of Shh-LIGHT2 cells (WT), Shh-LIGHT2 cells lacking

1103 *Luzp1* (*Luzp1*<sup>-/-</sup>) and *Luzp1*<sup>-/-</sup> cells rescued with human *LUZP1-YFP* (+LUZP1)

1104 analyzed in cycling conditions (non-starved), or during cilia assembly (48 hours

1105 starved) and disassembly (4 hours re-fed). Cilia were visualized by acetylated alpha-

1106 tubulin (magenta), basal body by gamma-tubulin (green) and nuclei by DAPI (blue).

1107 Scale bar 2.5 μm. **(B, C)** Graphical representation of percentage of ciliated cells per

1108 micrograph **(B)** and cilia length **(C)** measured in WT (blue circles, n>34 micrographs),

1109 *Luzp1*<sup>-/-</sup> (orange circles, n>44 micrographs) or +LUZP1 cells (green circles, n>30

1110 micrographs) from three independent experiments. **(D)** Immunofluorescence

1111 micrographs of WT and LUZP1<sup>-/-</sup> cells stained with antibodies against endogenous

1112 CCP110 (green), gamma tubulin to label the centrioles (purple) and DAPI to label the

1113 nuclei (blue). Black and white images show the single green and purple channels. Note

1114 the different distribution of CCP110 to the centrosome in LUZP1<sup>-/-</sup> compared to WT

1115 cells. **(E)** Graphical representation of the percentage of cells showing the presence of

1116 CCP110 to both centrioles per micrograph corresponding to the experiments in **(D)**;

1117 n=10 micrographs. Three independent experiments were pooled together. Pictures were

1118 taken using an Axioimager D1 fluorescence microscope, Zeiss, with a 63x objective.

1119 Scale bar, 1 μm. **(F)** Immunofluorescence micrographs of WT, *Luzp1*<sup>-/-</sup> and +LUZP1

1120 cells stained with an antibody against endogenous LUZP1 (green), phalloidin to detect

1121 F-actin (magenta), and counterstained with DAPI (blue). Single green and magenta

1122 channels are shown in black and white. Note the lack of LUZP1 in *Luzp1*<sup>-/-</sup> cells. Scale

1123 bar, 10 μm. **(G)** Immunofluorescence micrographs of non-starved and starved WT cells

1124 stained with antibodies against endogenous LUZP1 (green), phalloidin (magenta) and  
1125 DAPI (blue). Single green and magenta channels are shown in black and white. Scale  
1126 bar, 5  $\mu$ m. Imaging was performed using widefield fluorescence microscopy (Zeiss  
1127 Axioimager D1, 63x objective). (H) Graphical representation of the LUZP1 or F-actin  
1128 mean intensity as shown in (G). Graphs represent Mean and SEM of three independent  
1129 experiments pooled together. P-values were calculated using One-way ANOVA and  
1130 Bonferroni post-hoc test.

1131 The following figure supplement is available for Figure 5:

1132 Figure 5-figure supplement 1. LUZP1 mutant cells and antibody validation at the  
1133 cytoskeleton.

1134 Figure 5-figure supplement 2. LUZP1 mutant cells and antibody validation at the  
1135 centrosome.

1136 Figure 5-figure supplement 2. LUZP1 and antibody validation by Western blot.

1137

1138 **Figure 6. *Luzp1*<sup>-/-</sup> cells show aberrant Shh signaling.** (A, B) Graphical representation  
1139 of the fold-change in the expression of *Gli1* (n=5) (A) and *Ptch1* (n=7) (B) obtained by  
1140 qPCR from wild-type Shh-LIGHT2 cells (WT; blue dots) or Shh-LIGHT2 cells lacking  
1141 *Luzp1* (*Luzp1*<sup>-/-</sup>; orange dots), treated (+) or not (-) with purmorphamine for 24 hours.  
1142 (C) Western blot analysis of lysates from WT and *Luzp1*<sup>-/-</sup> cells. Samples were probed  
1143 against GLI3 that detects both GLI3-activator form (GLI3-A) and GLI3-repressor form  
1144 (GLI3-R) and GAPDH was used as loading control. Numbers under the lanes are the  
1145 result of dividing the activator by the repressor intensities, taking WT non-induced  
1146 value as 1. Molecular weight markers are shown to the right. (D) Graphical  
1147 representation of fold-change in luciferase activation when WT (n>7; blue dots),  
1148 *Luzp1*<sup>-/-</sup> (n>7; orange dots) or +LUZP1 (n=4; green dots) cells are treated for 6 and 24

1149 hours or not (-) with purmorphamine. All graphs represent the Mean and SEM. P-values  
1150 were calculated using two-tailed unpaired Student's t-test or One-way ANOVA and  
1151 Bonferroni post-hoc test.

1152 The following figure supplement is available for Figure 6:

1153 Figure 6-figure supplement 1. Western blot full pictures for Figure 6.

1154

1155 **Figure 7. Truncated SALL1 leads to LUZP1 degradation through the UPS. (A)**

1156 Representative Western blot of ESCTRL2 and TBS<sup>275</sup> total cell lysates treated or not

1157 with MG132. A specific antibody detected endogenous LUZP1, and GAPDH was used

1158 as loading control. **(B)** Graphical representation of the fold changes of LUZP1/GAPDH

1159 ratios obtained in **(A)** for of ESCTRL2 (blue dots) and TBS<sup>275</sup> (orange dots) treated (+)

1160 or not (-) with the proteasome inhibitor MG132. Note the increase of LUZP1 until

1161 reaching control levels in TBS<sup>275</sup> cells upon MG132 treatment. **(C)** Representative

1162 Western blot of 293<sup>WT</sup> and 293<sup>335</sup> total cell lysates treated or not with MG132. A

1163 specific antibody against LUZP1 detected endogenous LUZP1, and GAPDH was used

1164 as loading control. **(D)** Graphical representation of the fold changes of LUZP1/GAPDH

1165 ratios obtained in panel C for 293<sup>WT</sup> (blue dots) and 293<sup>335</sup> (orange dots) treated (+) or

1166 not (-) with MG132. Note that LUZP1 in 293<sup>335</sup> reaches control levels with MG132

1167 treatment. **(E)** Representative Western blot of total lysates of HEK 293FT cells

1168 transfected with *SALL1*<sup>275</sup>-*YFP* (lanes 1 and 3) or *YFP* alone (lanes 2 and 4) treated (+)

1169 or not (-) with MG132. Specific antibodies against LUZP1, GFP and GAPDH were

1170 used. **(F)** Graphical representation of the fold changes of LUZP1/GAPDH ratios

1171 obtained in **(E)** for HEK 293FT cells transfected with *SALL1*<sup>275</sup>-*YFP* (orange dots) or

1172 *YFP* alone (blue dots) treated (+) or not (-) with MG132. Note that LUZP1 increases in

1173 the presence of MG132 when *SALL1*<sup>275</sup>-*YFP* was transfected. Data from at least three

1174 independent experiments pooled together are shown. P-values were calculated using  
1175 two-tailed unpaired Student's t-test. (G) Immunofluorescence micrographs of RPE1  
1176 cells treated (+MG132) or not (-MG132) with proteasome inhibitor showing LUZP1 in  
1177 the cytoskeleton (upper panels) or in the centrosome (lower panels). Note the overall  
1178 increase of LUZP1 upon MG132 treatment. Scale bar 10  $\mu\text{m}$  (cytoskeleton panels) or  
1179 0.5  $\mu\text{m}$  (centrosome panels). Images were taken using widefield fluorescence  
1180 microscopy (Zeiss Axioimager D1, 63x objective). (H) Western blot analysis of input  
1181 and biotin pulldown (PD) of HEK 293FT cells transfected with *LUZP1-YFP* and BioUb  
1182 or BirA alone treated (+) or not (-) with MG132. Specific antibodies (GFP, GAPDH,  
1183 Biotin) were used as indicated. Numbers under GFP panel are the result of dividing  
1184 each biotin PD band intensity by the respective input band intensity and normalize them  
1185 to lane 1. Molecular weight markers in kDa are shown to the right. Two asterisks  
1186 indicate monoubiquitinated LUZP1.

1187 The following figure supplement is available for Figure 7:

1188 Figure 7-figure supplement 1. Western blot full pictures for Figure 7.

1189 Figure 7-figure supplement 2. LUZP1 mRNA expression levels.

1190

1191 **Figure 8. LUZP1 overexpression suppresses ciliogenesis and increases F-actin**  
1192 **levels. (A)** Representative micrographs of ciliated control and TBS<sup>275</sup> cells  
1193 overexpressing *YFP* or *LUZP1-YFP*. Yellow arrowhead and white asterisk point at a  
1194 magnified region shown in the lower right panel in black and white. Note the lack of  
1195 cilia in cells overexpressing LUZP1-YFP (white asterisk) compared to non-transfected  
1196 cells (yellow arrow). AcTub: acetylated alpha tubulin; CETN2: Centrin-2. (B)  
1197 Graphical representation of the number of ciliated cells per micrograph in control and  
1198 TBS<sup>275</sup> cells overexpressing *YFP* or *LUZP1-YFP* (n>10 micrographs). Graphs

1199 represent Mean and SEM of ciliation frequencies per micrograph in three independent  
1200 experiments pulled together. P-values were calculated using One-way ANOVA and  
1201 Bonferroni post-hoc test or two-tailed unpaired Student's t-test. (C) Representative  
1202 micrographs of Control and TBS<sup>275</sup> cells overexpressing *YFP* (yellow arrowhead) or  
1203 *LUZP1-YFP* (white asterisk) co-stained with phalloidin to label F-actin and DAPI. Note  
1204 the increase in F-actin levels in cells overexpressing *LUZP1-YFP* (white asterisk)  
1205 compared to non-transfected cells (yellow arrow). Scale bar, 10  $\mu$ m. Imaging was  
1206 performed using widefield fluorescence microscopy (Zeiss Axioimager D1, 63x  
1207 objective). (D) A model representing how the presence of truncated *SALL1* underlies  
1208 cilia and actin malformations in TBS through *LUZP1* interaction and UPS-mediated  
1209 degradation. In control (or fed) cells (left), *LUZP1* (in green) localizes to F-actin and  
1210 to the proximal ends of the two centrioles, inhibiting cilia formation. By contrast, in  
1211 TBS (or starved) cells (right) the truncated form of *SALL1* interacts with *LUZP1*,  
1212 leading to its UPS-mediated degradation. As a result, *LUZP1* levels are reduced both  
1213 at the centrosome and at the cytoskeleton, which will allow the formation of the primary  
1214 cilia.

1215

1216

## 1217 **FIGURE SUPPLEMENT LEGENDS**

1218

1219 **Figure 1-figure supplement 1. Western blot full pictures for Figure 1.** Titles  
1220 indicate the Figure where each Western blot belongs to; magenta boxes show the region  
1221 of the gel that was used to build the indicated figures. *SALL1*<sup>FL</sup> protein is indicated by  
1222 one asterisk, *SALL1* truncated forms by one black arrowhead, *YFP* alone by two black

1223 arrowheads. Bands from previous probing or unspecific bands are indicated by one  
1224 empty arrowhead. Molecular weight markers are shown to the right.

1225

1226 **Figure 2-figure supplement 1. Centrosomal localization of LUZP1 along the cell**  
1227 **cycle.** Immunofluorescence micrographs showing LUZP1 in the centrosome during cell  
1228 cycle in RPE1 cells. Cells were treated with mimosine (G1 phase), thymidine (S phase),  
1229 RO-3306 (G2/M phase) or starved (G0) with and without the proteasome inhibitor  
1230 MG132. Cells were stained in green with antibodies against endogenous LUZP1, in  
1231 magenta with CEP164 and in blue with CETN2 (yellow arrowheads). Note a general  
1232 decrease of LUZP1 during G2/M and upon starvation (G0), which is recovered by  
1233 MG132 addition. Scale bar 0.5  $\mu\text{m}$ . Images were taken using widefield fluorescence  
1234 microscopy (Zeiss Axioimager D1, 63x objective).

1235

1236 **Figure 2-Supplementary video 1. LUZP1 localization in the centrosome.** 3D  
1237 reconstruction of Z-stack micrographs of human control fibroblasts (ESCTRL#2)  
1238 stained with antibodies against endogenous LUZP1 (green) and acetylated alpha and  
1239 gamma tubulin to label the cilia and centrosomes, respectively (magenta). Image was  
1240 taken using Confocal Super-resolution microscopy (LSM 980, Zeiss).

1241

1242 **Figure 3-figure supplement 1. Western blot full pictures for Figure 3.** Titles  
1243 indicate the Figure where each Western blot belongs to; magenta boxes show the region  
1244 of the gel that was used to build the indicated figures. LUZP1-YFP is indicated by two  
1245 empty arrowheads and YFP alone by two black arrowheads. Bands from previous  
1246 probing or unspecific bands are indicated by one empty arrowhead. Molecular weight  
1247 markers are shown to the right.

1248

1249 **Figure 4-figure supplement 1. Western blot full pictures for Figure 4.** Titles  
1250 indicate the Figure where each Western blot belongs to; magenta boxes show the region  
1251 of the gel that was used to build the indicated figures. LUZP1-YFP is indicated by two  
1252 empty arrowheads and YFP alone by two black arrowheads. Bands from previous  
1253 probing or unspecific bands are indicated by one empty arrowhead. Molecular weight  
1254 markers are shown to the right.

1255

1256 **Figure 4-figure supplement 2. LUZP1 localization at the cytoskeleton along the**  
1257 **cell cycle.** Immunofluorescence micrographs showing LUZP1 in the whole cell during  
1258 cell cycle in RPE1 cells. Cells were treated with mimosine (G1 phase), thymidine (S  
1259 phase), RO-3306 (G2/M phase) or starved (G0) with and without the proteasome  
1260 inhibitor MG132. Cells were stained in green with antibodies against endogenous  
1261 LUZP1, and in blue with DAPI. Note a general decrease of LUZP1 during G2/M and  
1262 upon starvation (G0), which is recovered by MG132 addition. Scale bar 10  $\mu$ m. Images  
1263 were taken using widefield fluorescence microscopy (Zeiss Axioimager D1, 63x  
1264 objective).

1265

1266 **Figure 4-figure supplement 3. LUZP1 localization at the midbody.**  
1267 Immunofluorescence micrographs of two dividing Shh-LIGHT2 WT cells stained with  
1268 antibodies against endogenous LUZP1 (green), acetylated tubulin to label microtubules  
1269 (magenta) and DAPI to label the nuclei (blue). Note the presence of LUZP1 in the  
1270 midbody (yellow arrowhead). Scale bar 30  $\mu$ m. Imaging was performed using widefield  
1271 fluorescence microscopy (Zeiss Axioimager D1, 63x objective).

1272

1273 **Figure 5-figure supplement 1. LUZP1 mutant cells and antibody validation at the**  
1274 **cytoskeleton.** Immunofluorescence micrographs of Shh-LIGHT2 control cells (WT),  
1275 *Luzp1* depleted Shh-LIGHT2 cells (*Luzp1*<sup>-/-</sup>) and *Luzp1*<sup>-/-</sup> cells rescued with human  
1276 *LUZP1* (+LUZP1 cells) stained with a specific antibody against endogenous LUZP1  
1277 (Sigma, green) and DAPI (blue). Single green channels are shown in black and white.  
1278 Note the lack of LUZP1 in *Luzp1*<sup>-/-</sup> cells. Scale bar, 10 μm.

1279

1280 **Figure 5-figure supplement 2. LUZP1 mutant cells and antibody validation at the**  
1281 **centrosome.** Immunofluorescence micrographs of Shh-LIGHT2 control cells (WT),  
1282 *Luzp1* depleted Shh-LIGHT2 cells (*Luzp1*<sup>-/-</sup>) and *Luzp1*<sup>-/-</sup> cells stained with antibodies  
1283 against endogenous LUZP1 (green) and gamma tubulin (magenta). Single green and  
1284 magenta channels are shown in black and white. Note the lack of LUZP1 in the  
1285 centrosome in *Luzp1*<sup>-/-</sup> cells. Scale bar, 2.5 μm. Images were taken using widefield  
1286 fluorescence microscopy (Zeiss Axioimager D1, 63x objective).

1287

1288 **Figure 5-figure supplement 2. LUZP1 and antibody validation by Western blot.**  
1289 Western blot analysis of total lysates of Shh-LIGHT2 control cells (WT), *Luzp1*  
1290 depleted Shh-LIGHT2 cells (*Luzp1*<sup>-/-</sup>) and *Luzp1*<sup>-/-</sup> cells using anti-LUZP1 antibodies.  
1291 Molecular weights in kDa are shown to the right.

1292

1293 **Figure 6-figure supplement 1. Western blot full pictures for Figure 6.** Title  
1294 indicates the Figure where the Western blot belongs to; magenta boxes show the region  
1295 of the gel that was used to build the indicated figures. Molecular weight markers are  
1296 shown to the right.

1297



1298 **Figure 7-figure supplement 1. Western blot full pictures for Figure 7.** Titles  
1299 indicate the Figure where each Western blot belongs to; magenta boxes show the region  
1300 of the gel that was used to build the indicated figures. Ubiquitinated LUZP1 is indicated  
1301 by two asterisks, LUZP1-YFP by two empty arrowheads and YFP alone by two black  
1302 arrowheads. Bands from previous probing or unspecific bands are indicated by one  
1303 empty arrowhead. Molecular weight markers are shown to the right.

1304

1305 **Figure 7-figure supplement 2. LUZP1 mRNA expression levels.** Quantification of  
1306 *LUZP1* expression in control (ESCTRL2) vs TBS<sup>275</sup> cells by qPCR. Graphs represent  
1307 Mean and SEM from 5 independent experiments. P-values were calculated using the  
1308 Mann Whitney test.

1309

1310

1311 **TABLE TITLE AND LEGEND**

1312 **Table S1. Identification of LUZP1 interactors by proximity proteomics.**

1313

1314

1315

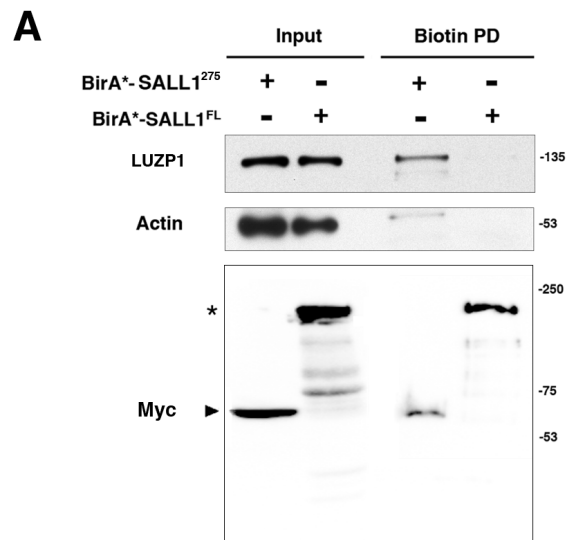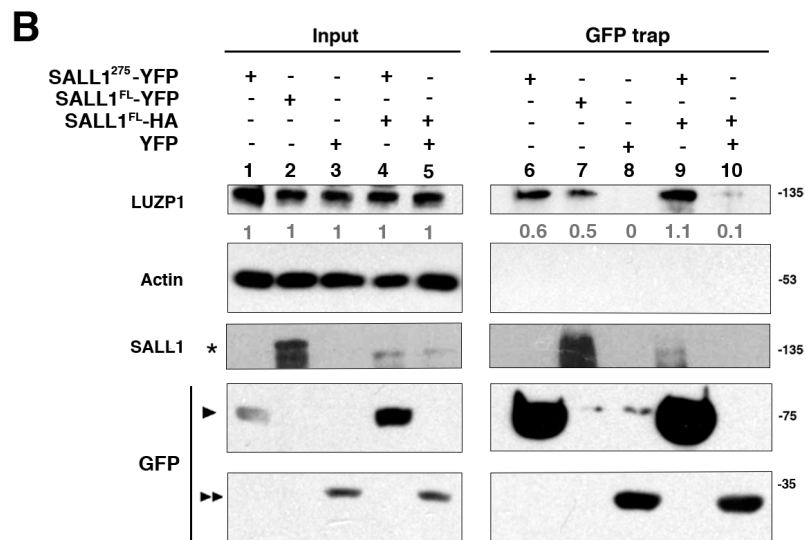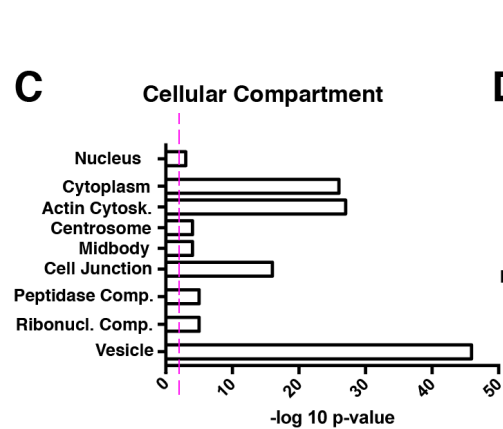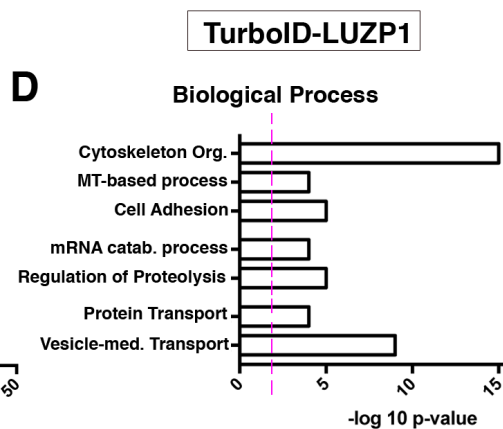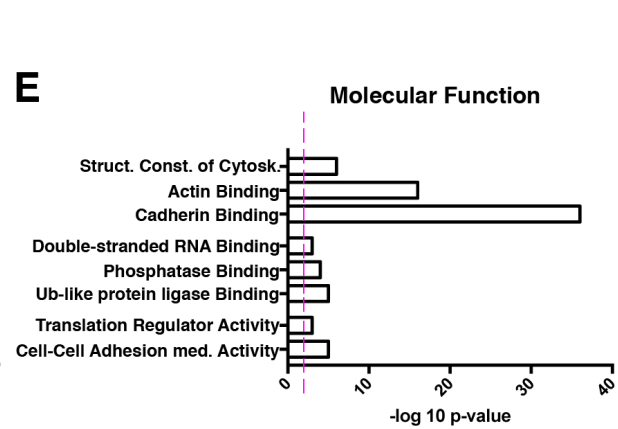

TurboID-LUZP1

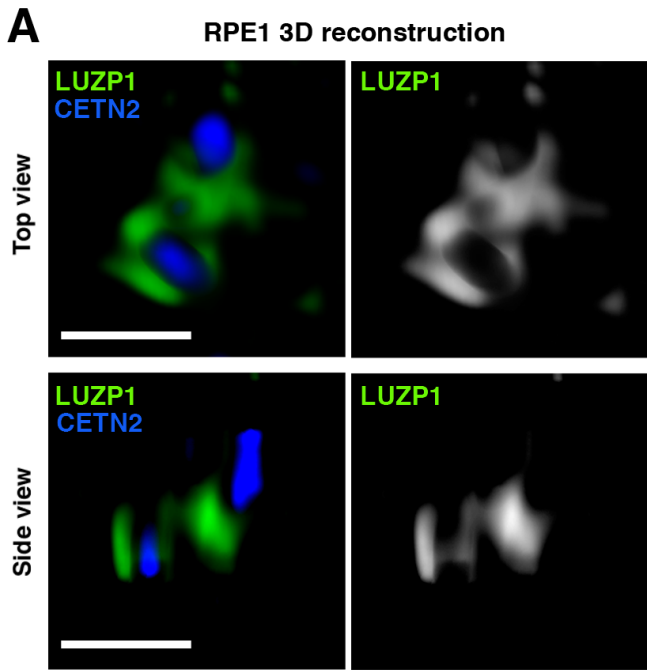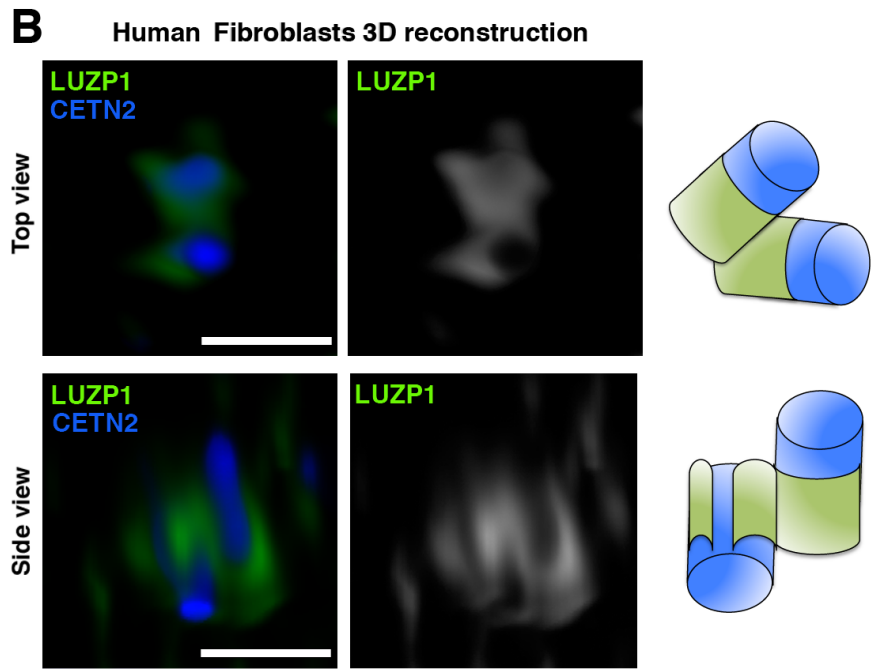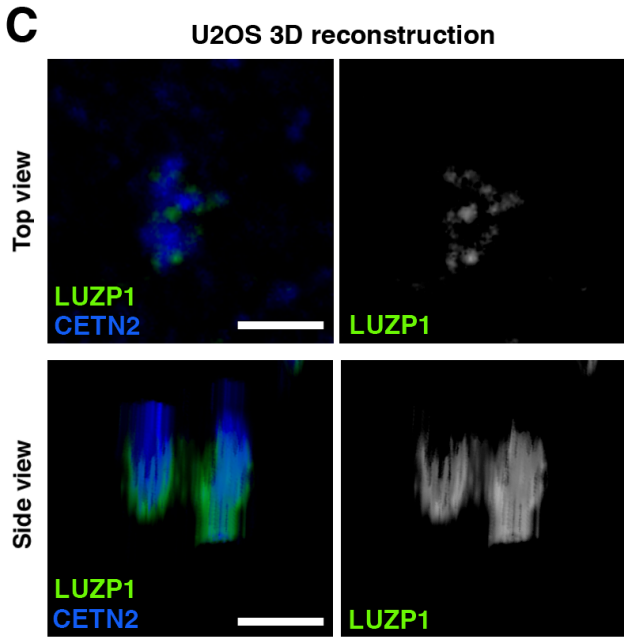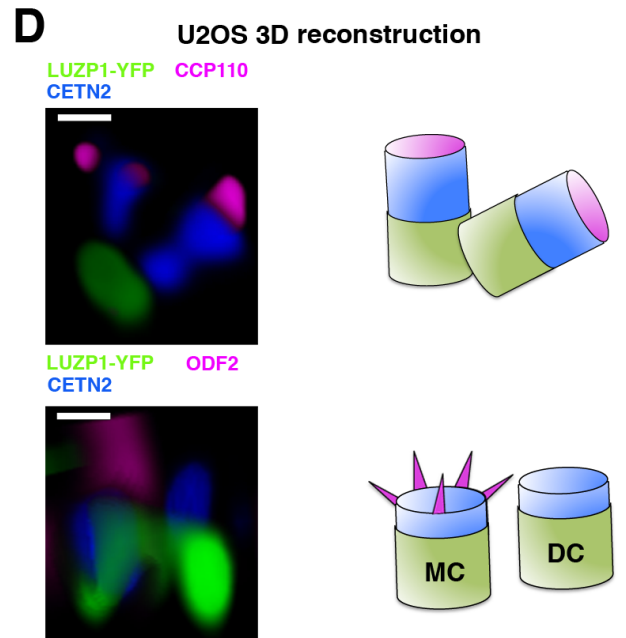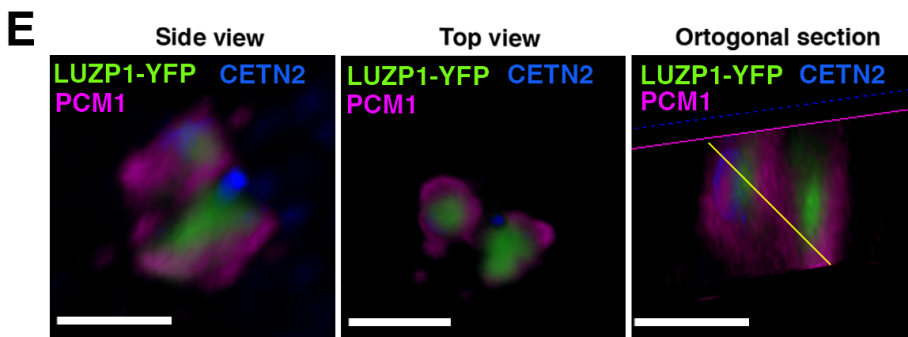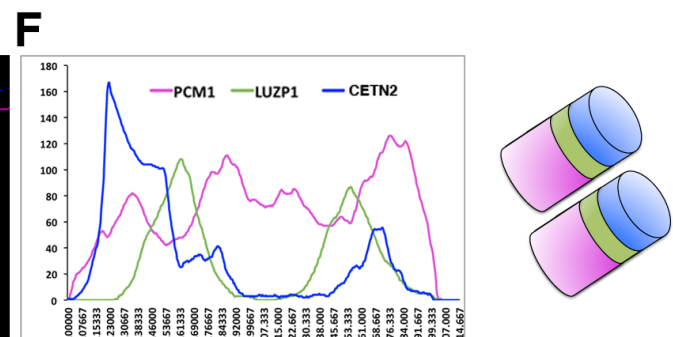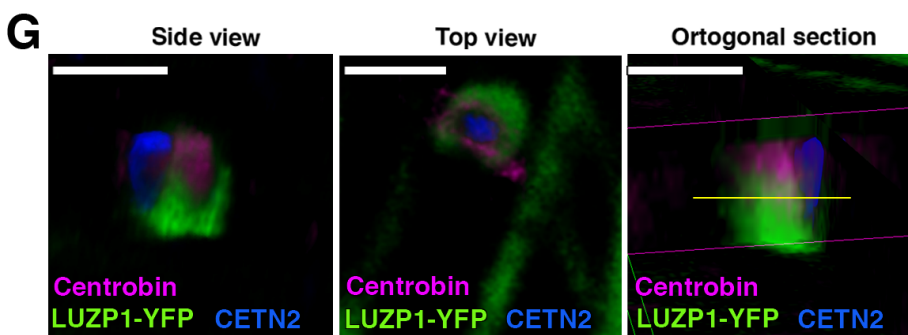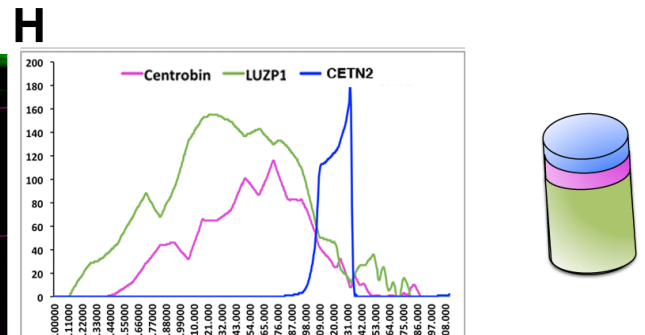

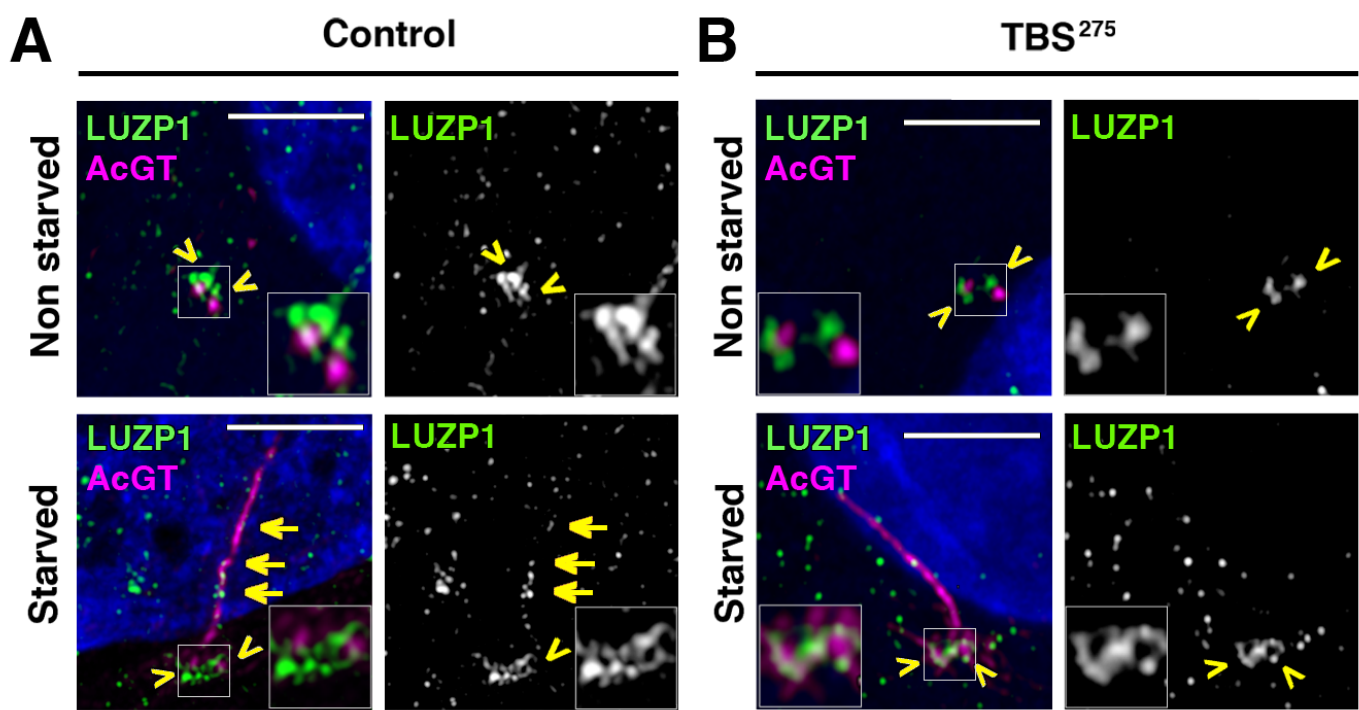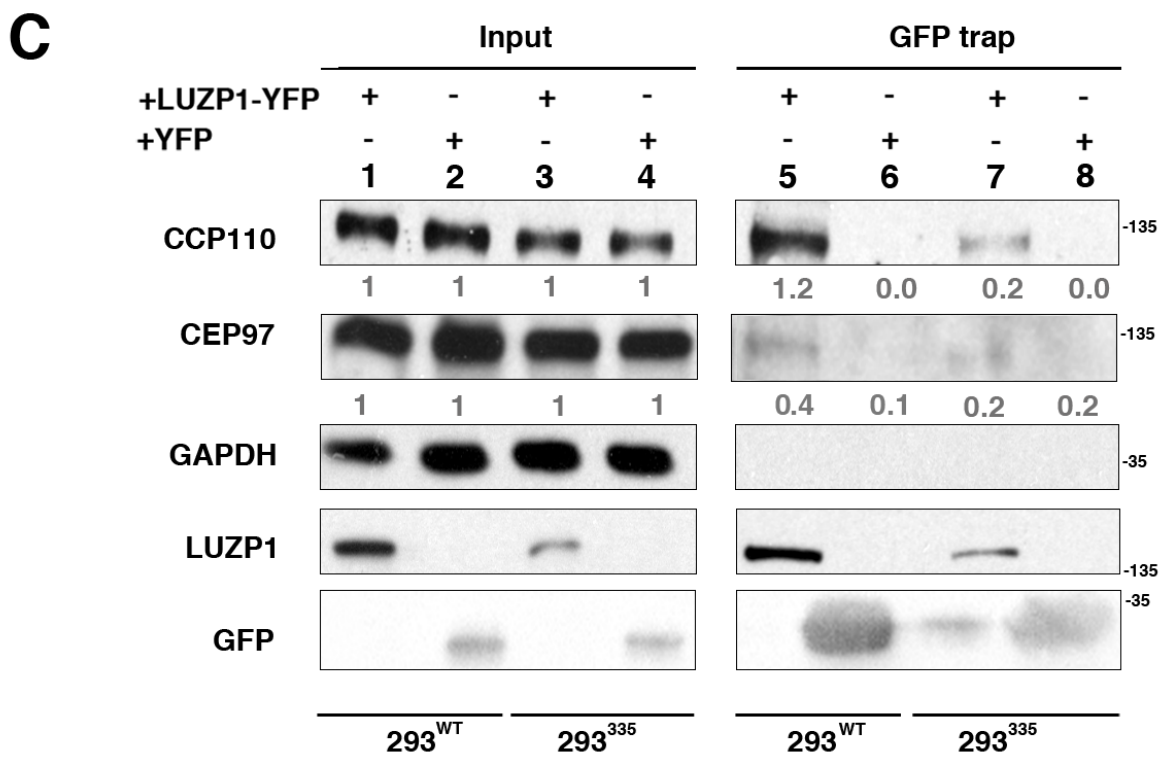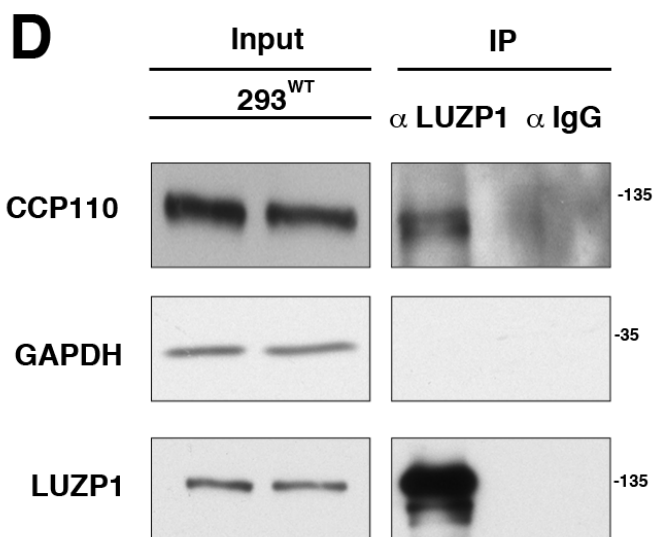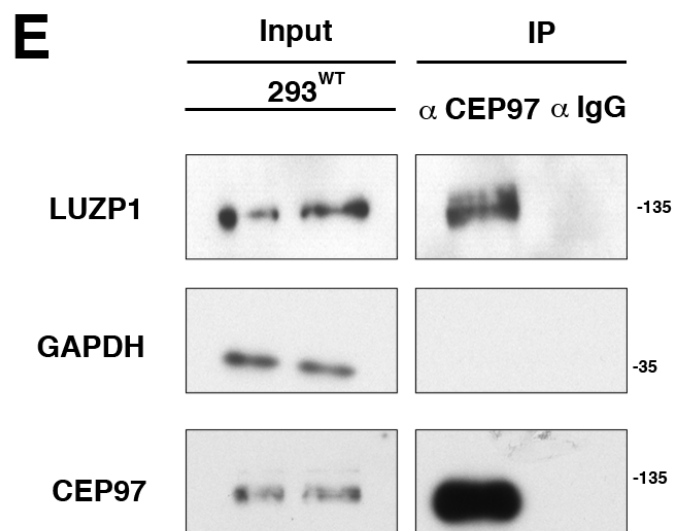

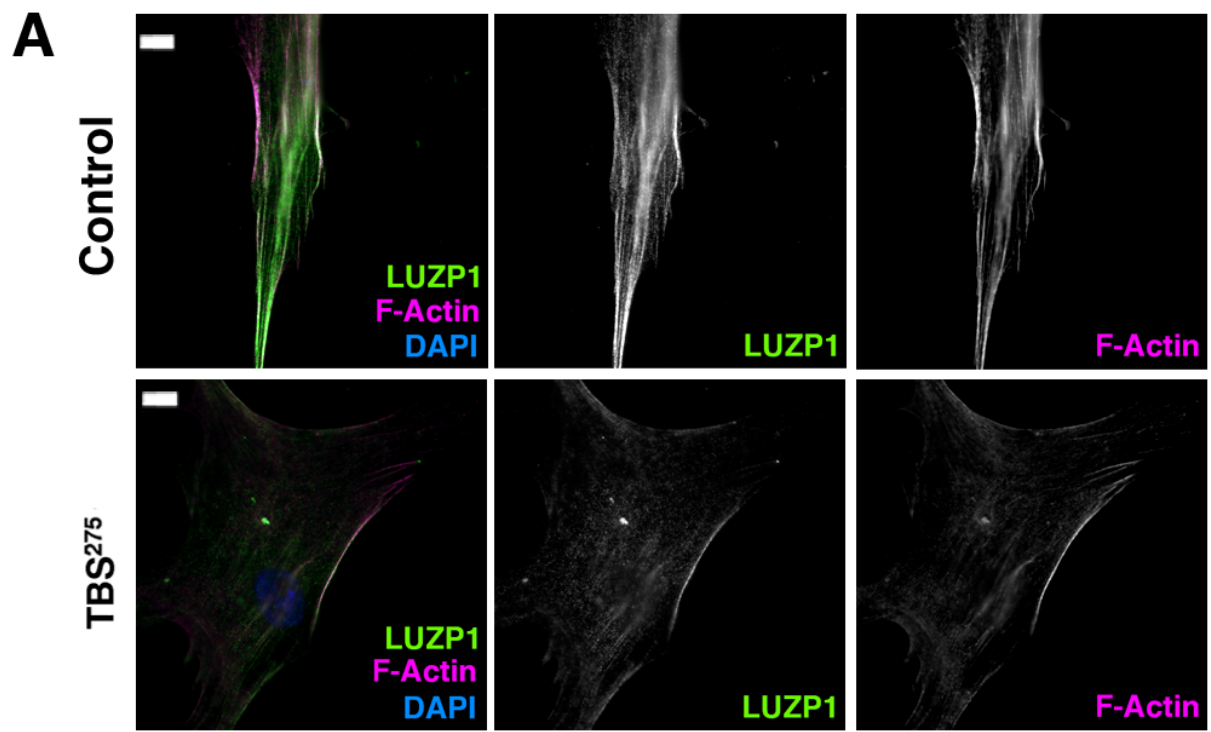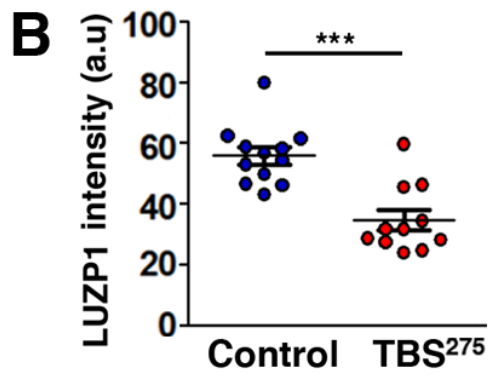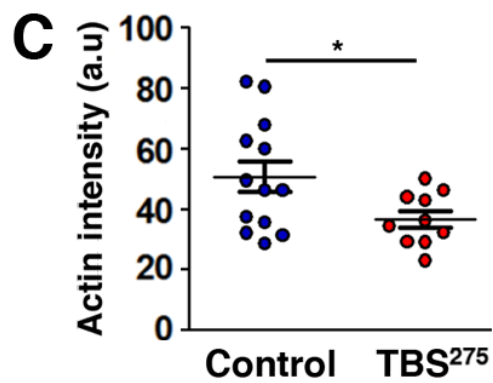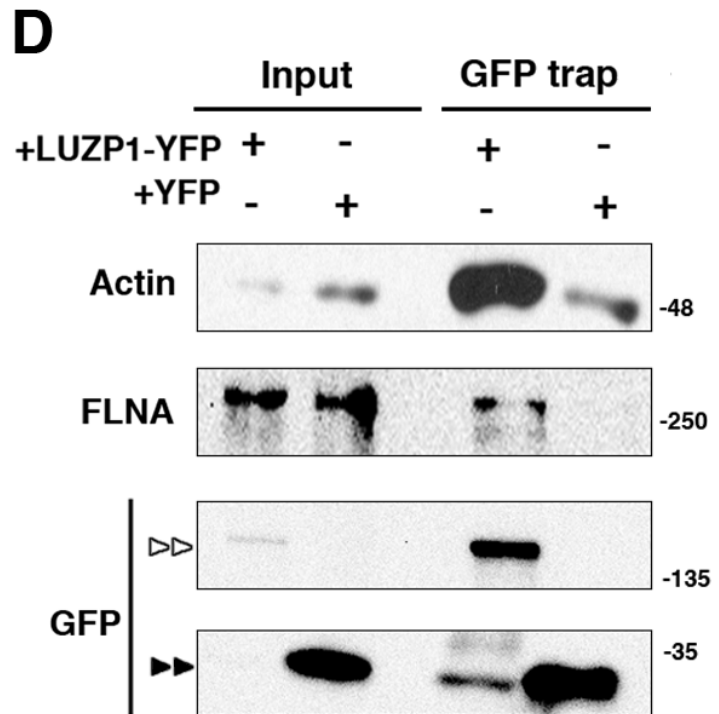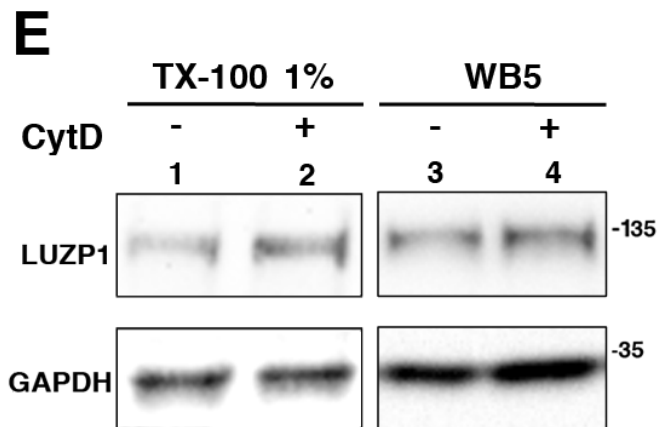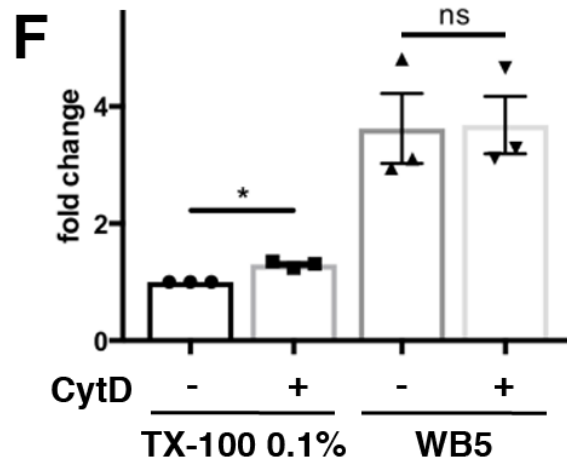

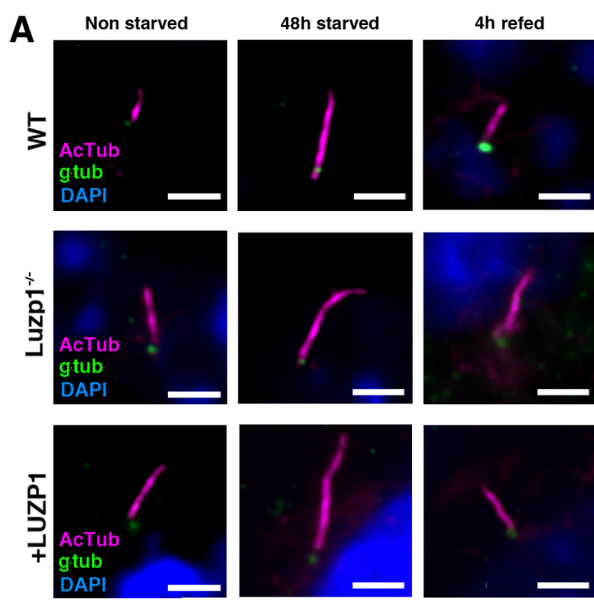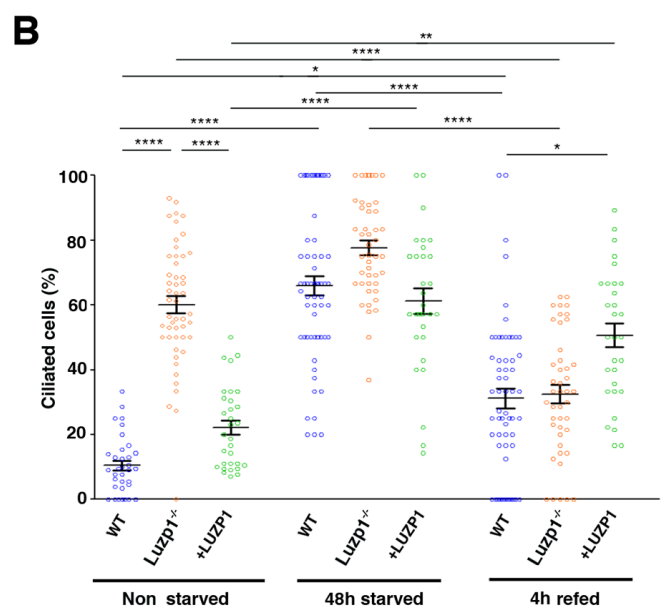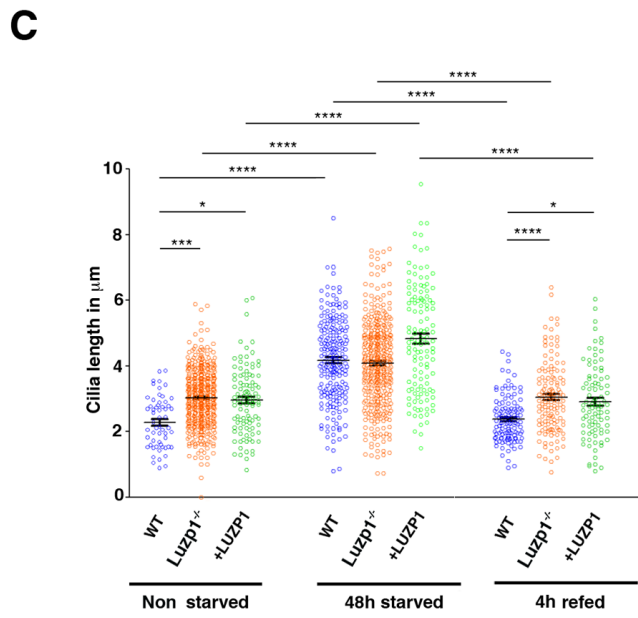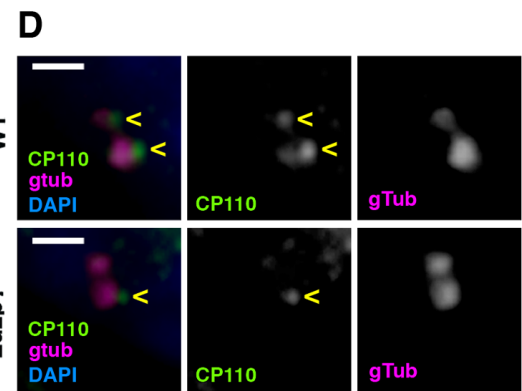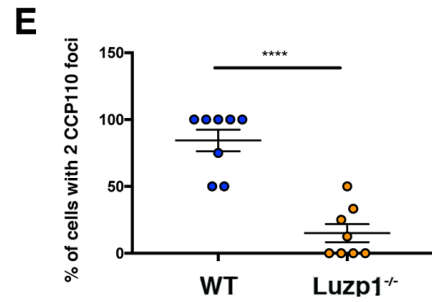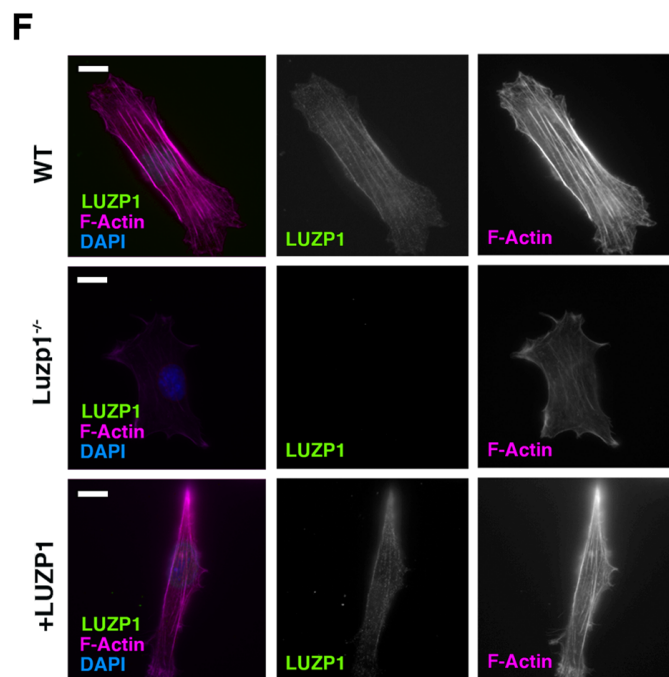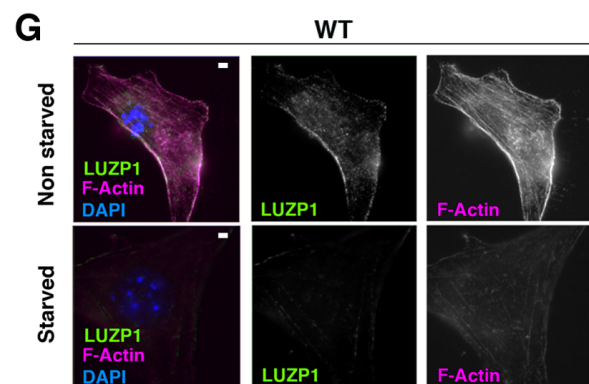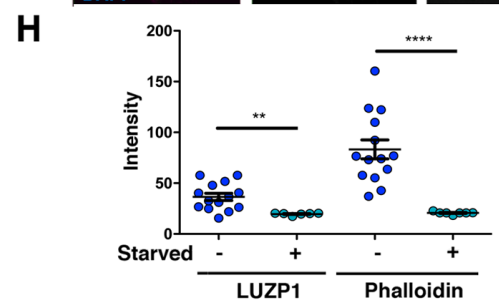

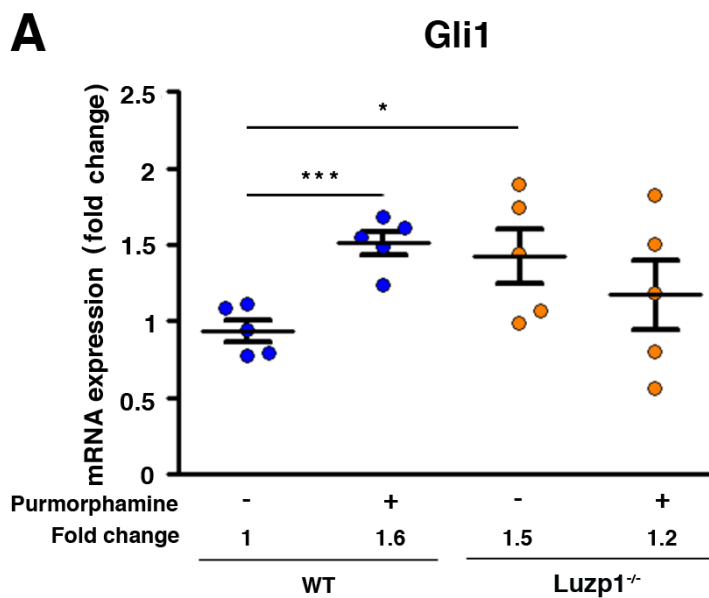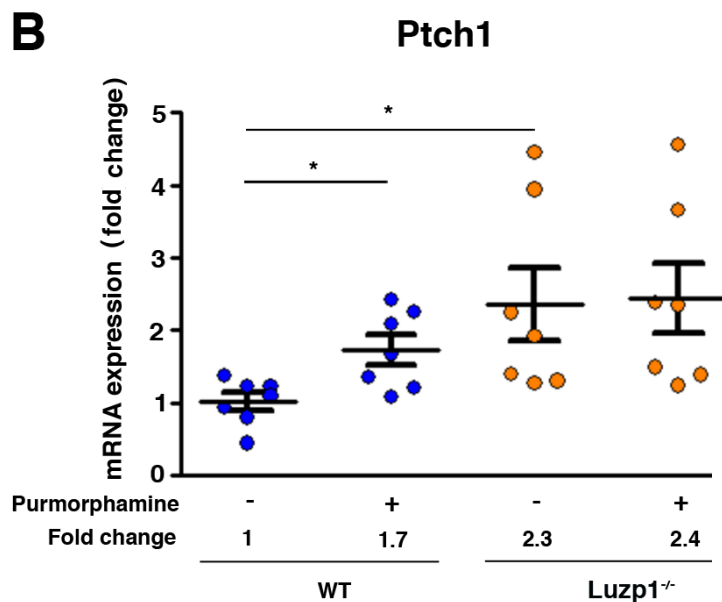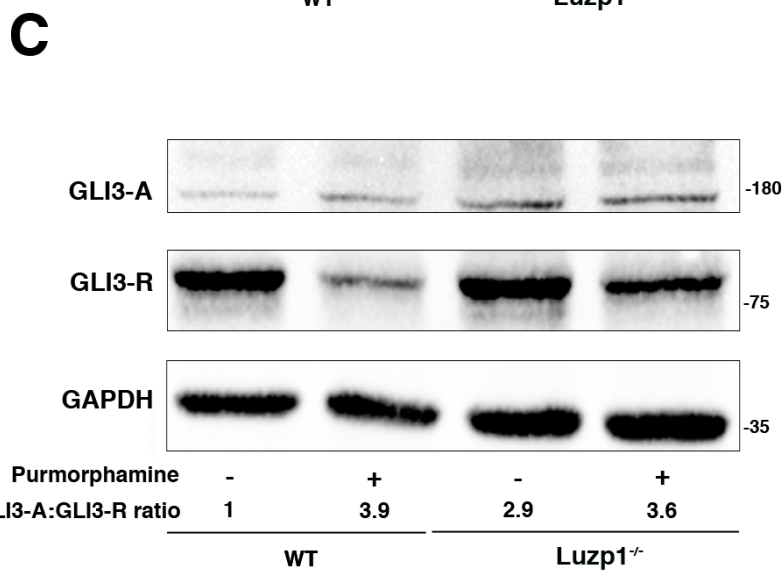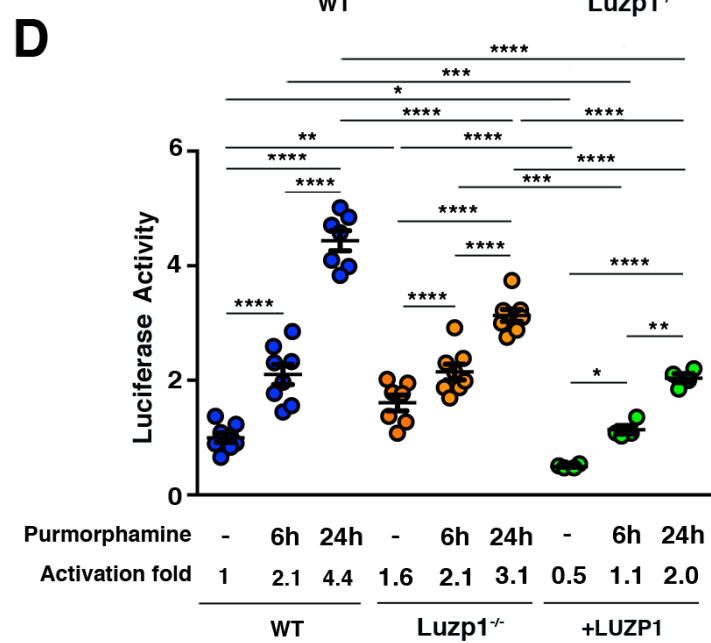

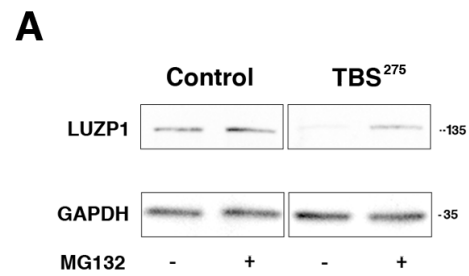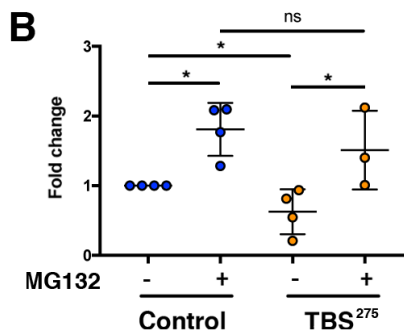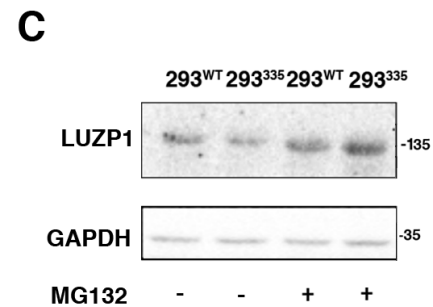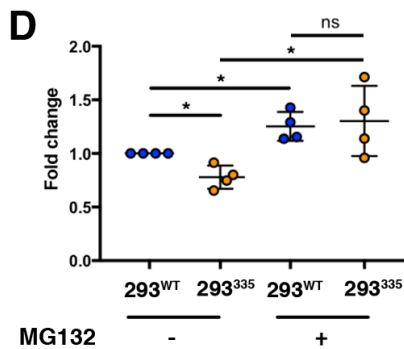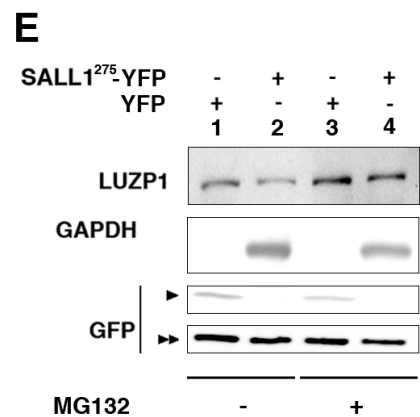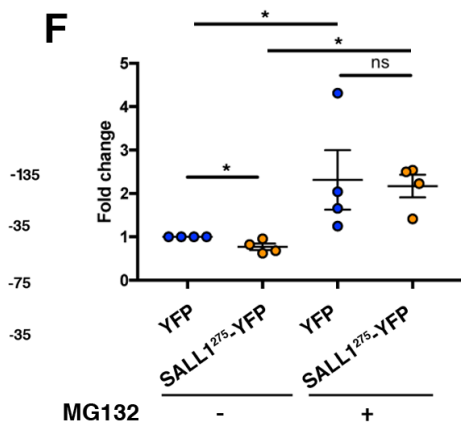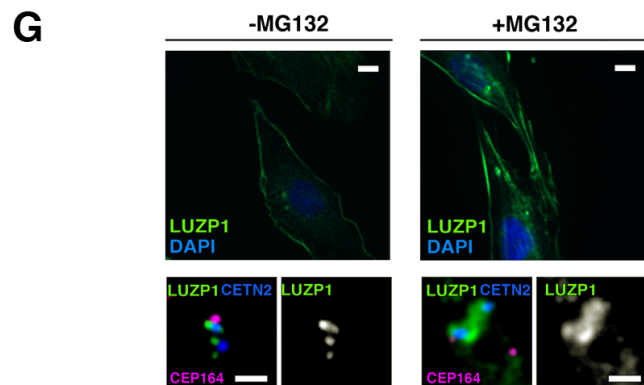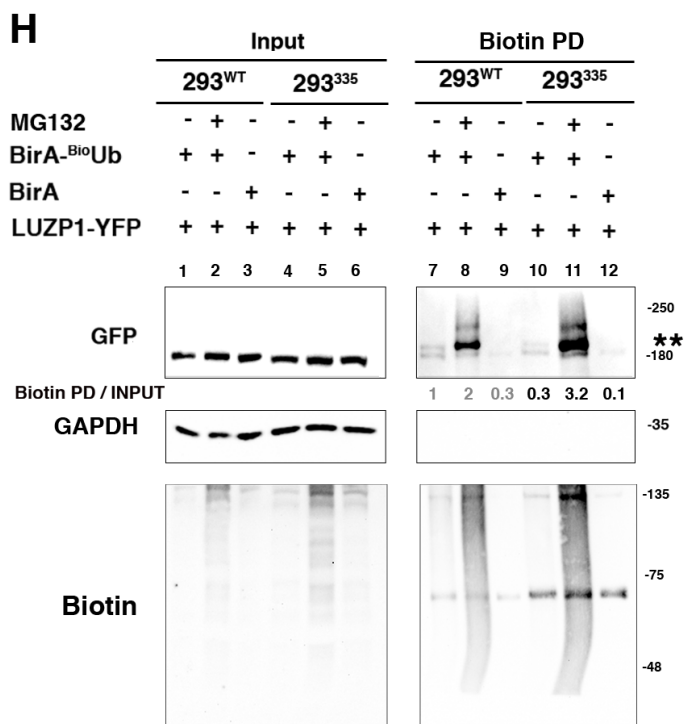



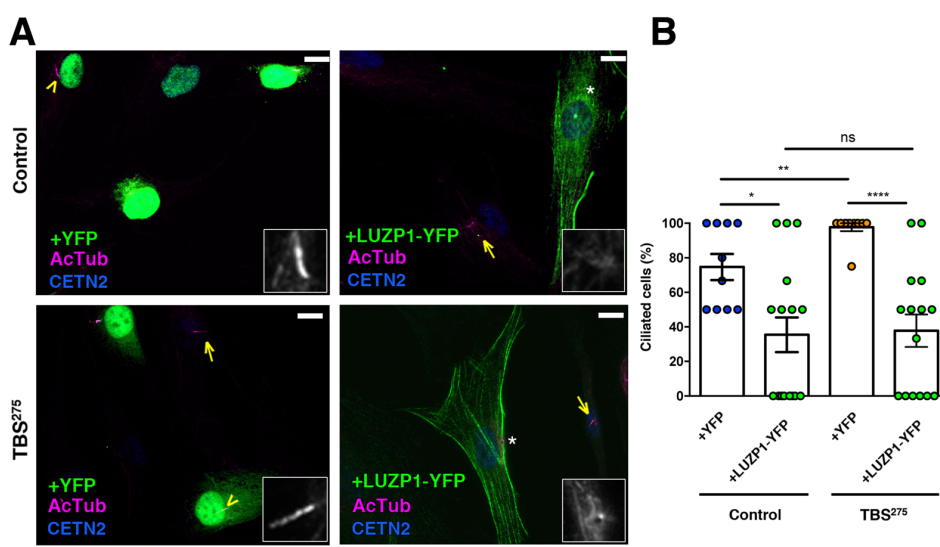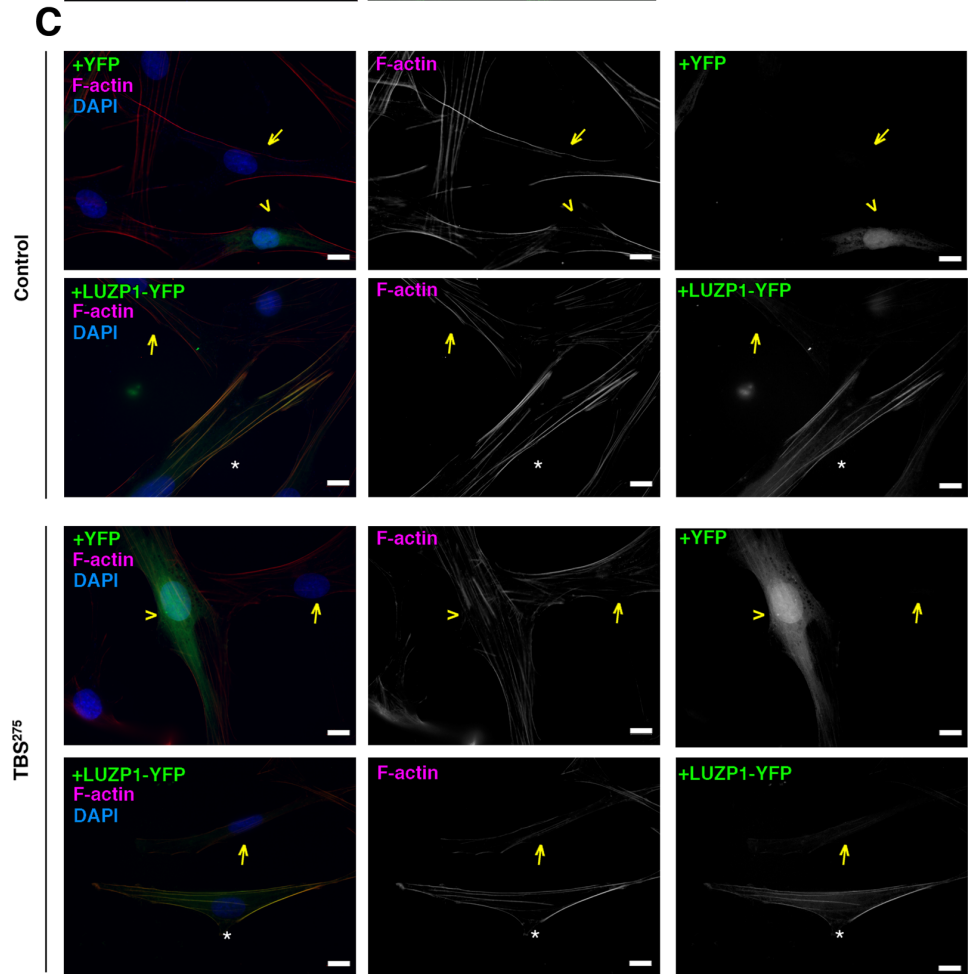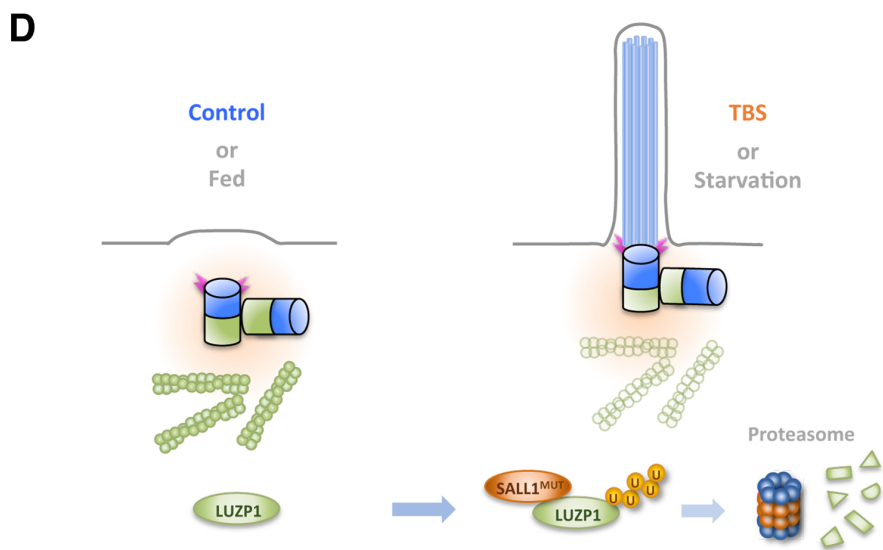

Figure 1A

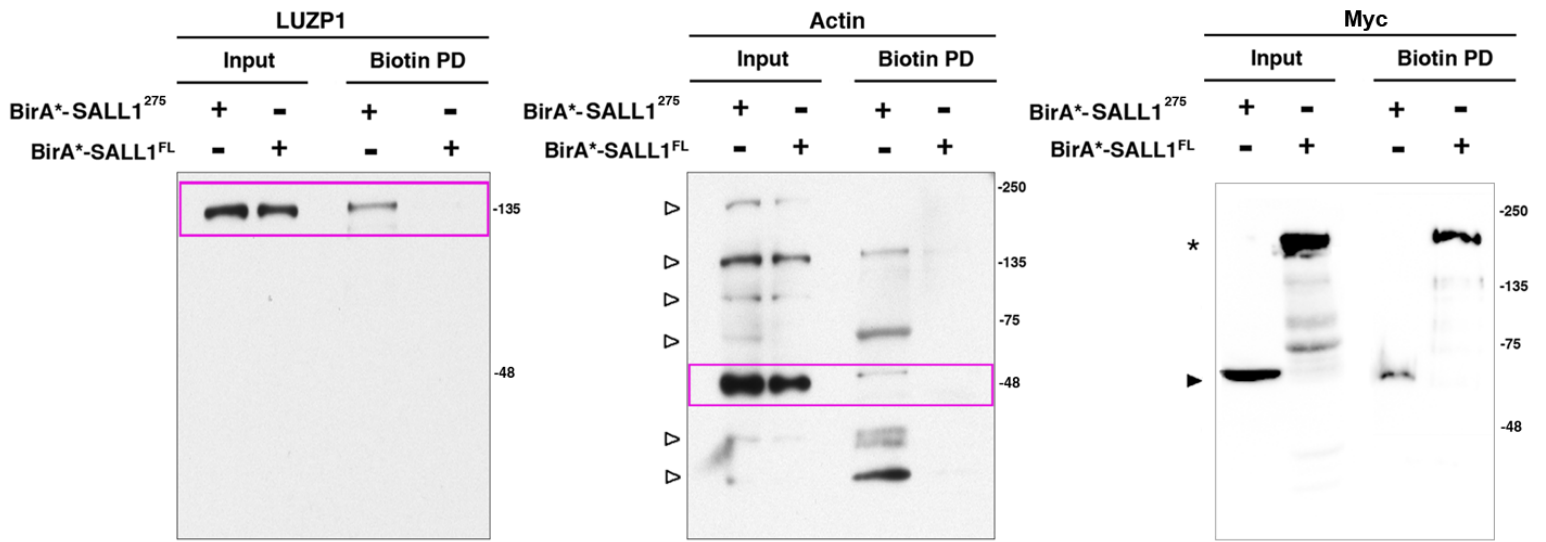

Figure 1B

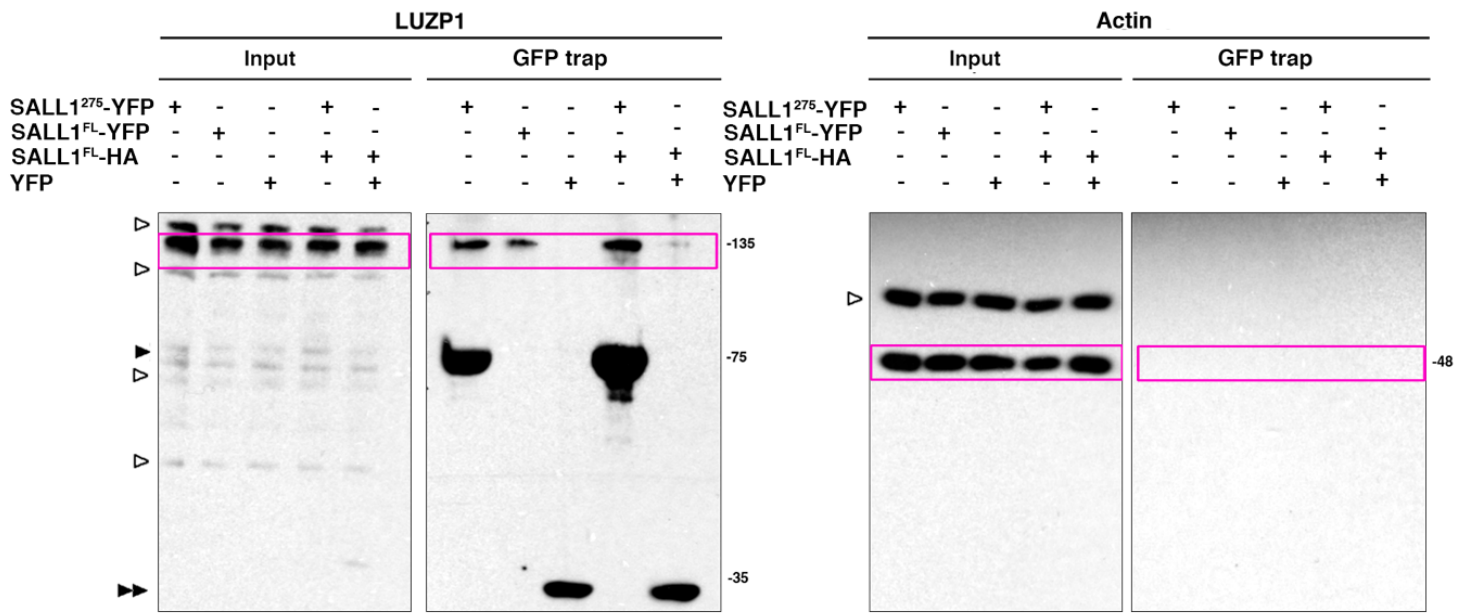

Figure 1B

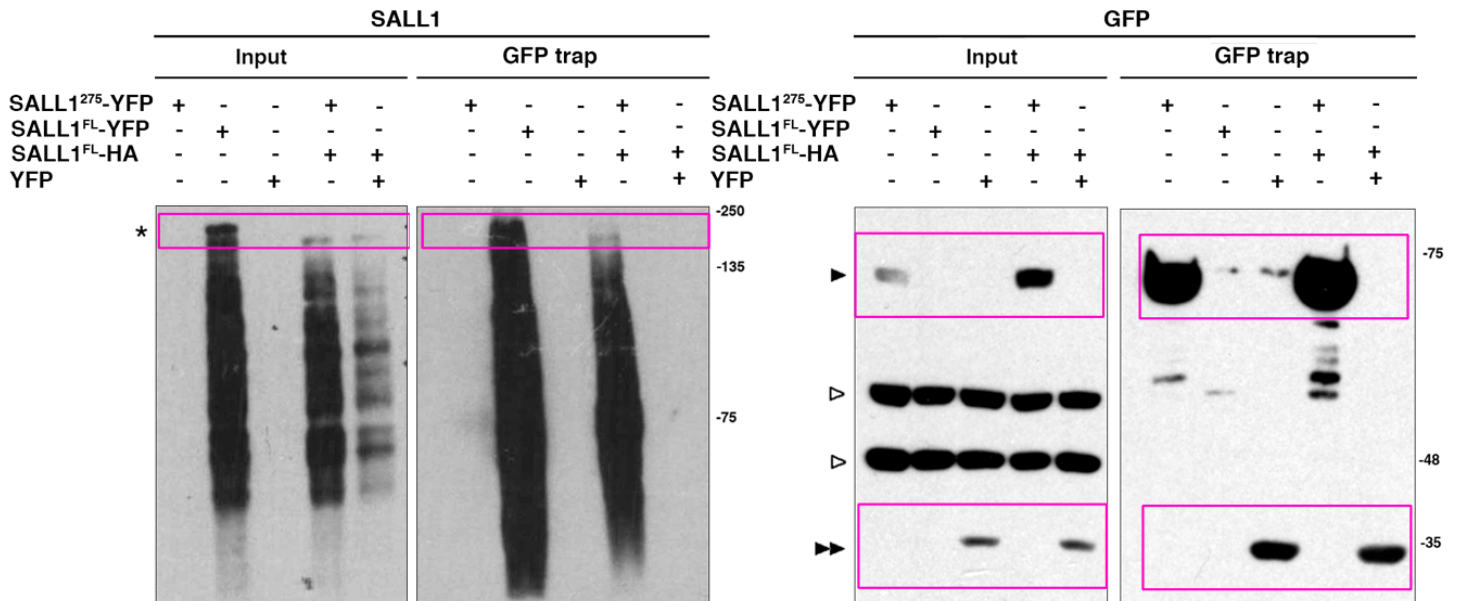

G1

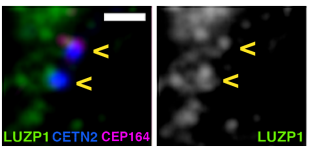

S

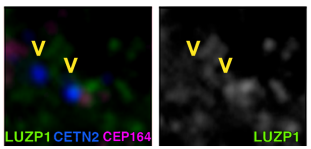

G2/M

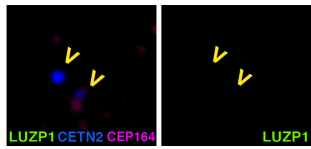

G0

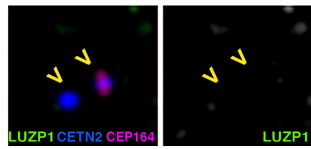

G0 +MG132

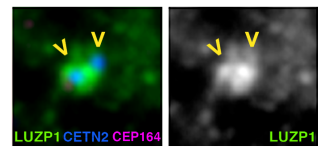

Figure 3C

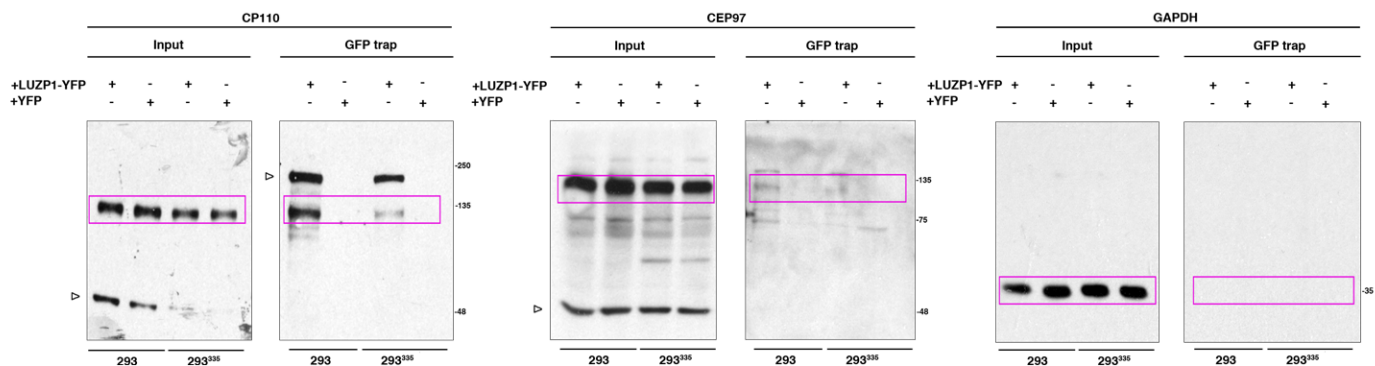

Figure 3C

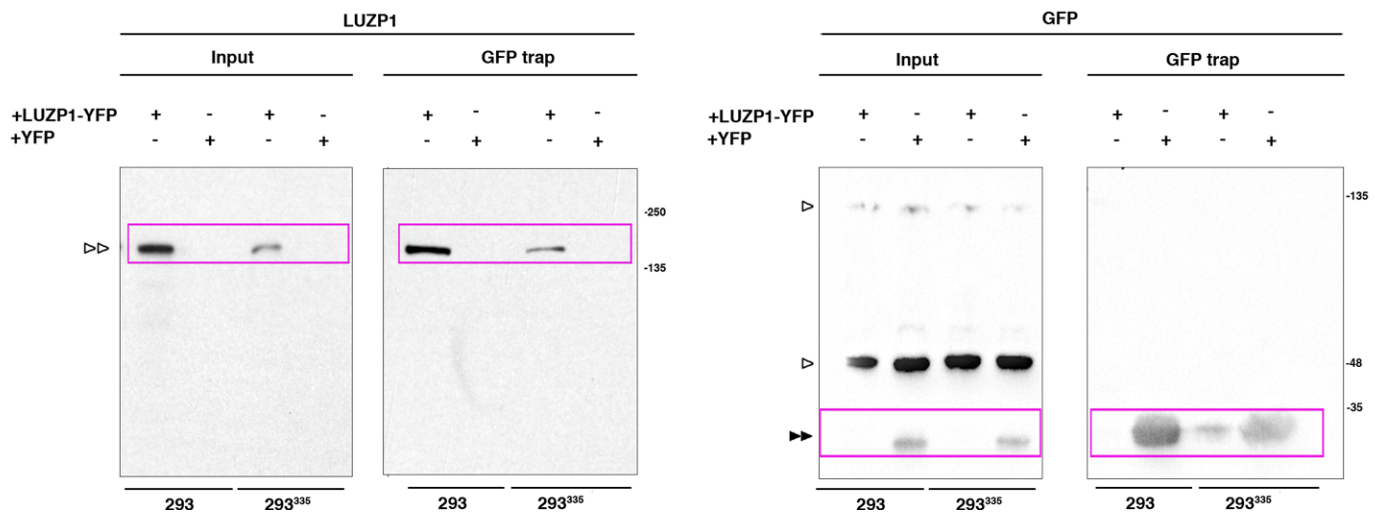

Figure 3D

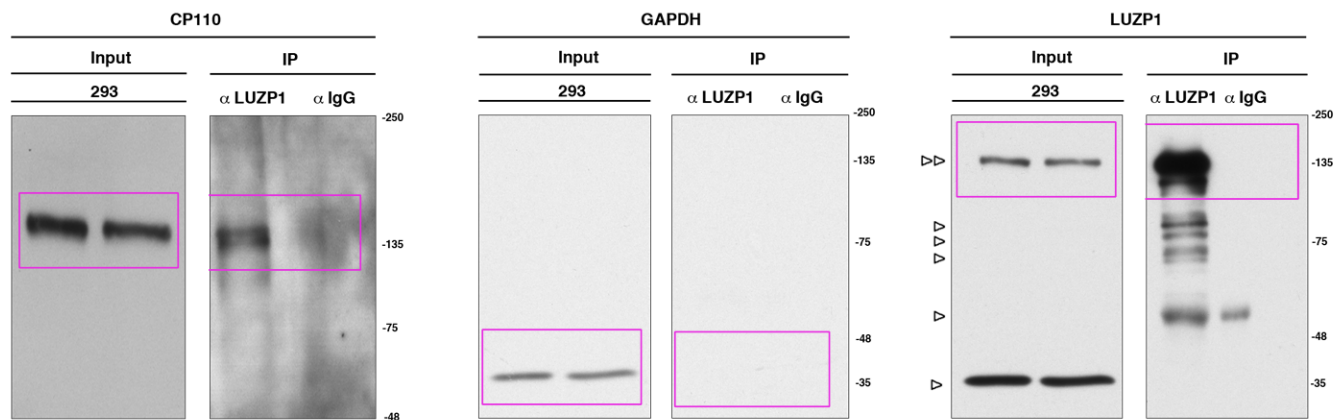

Figure 3D

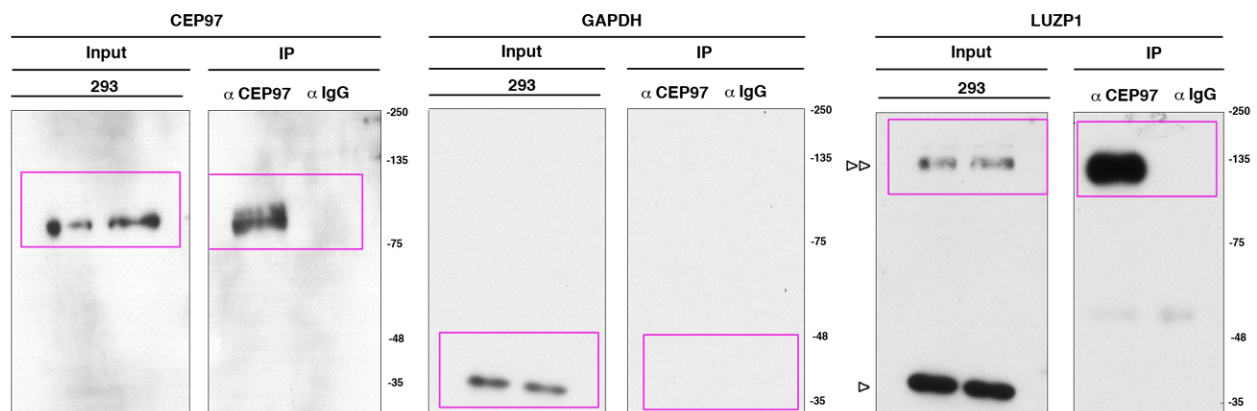

**Figure 4D**

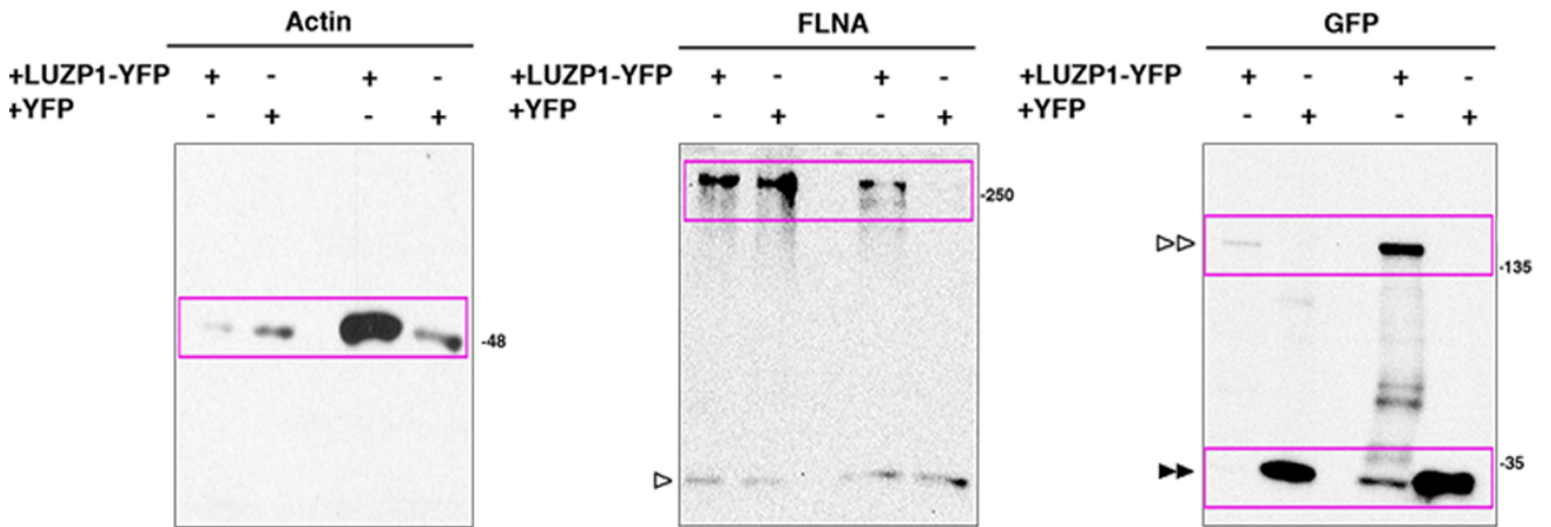

**Figure 4E**

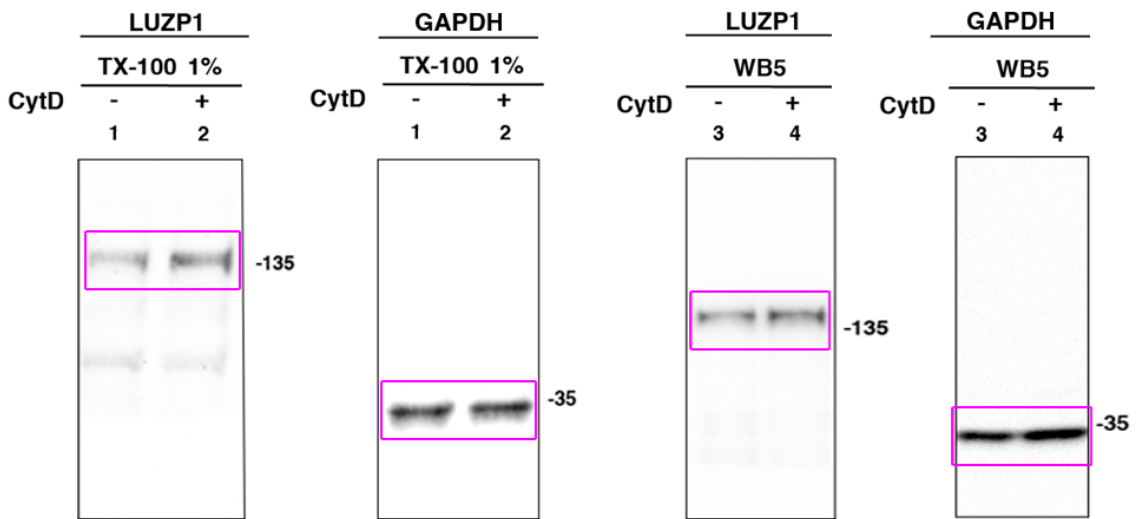

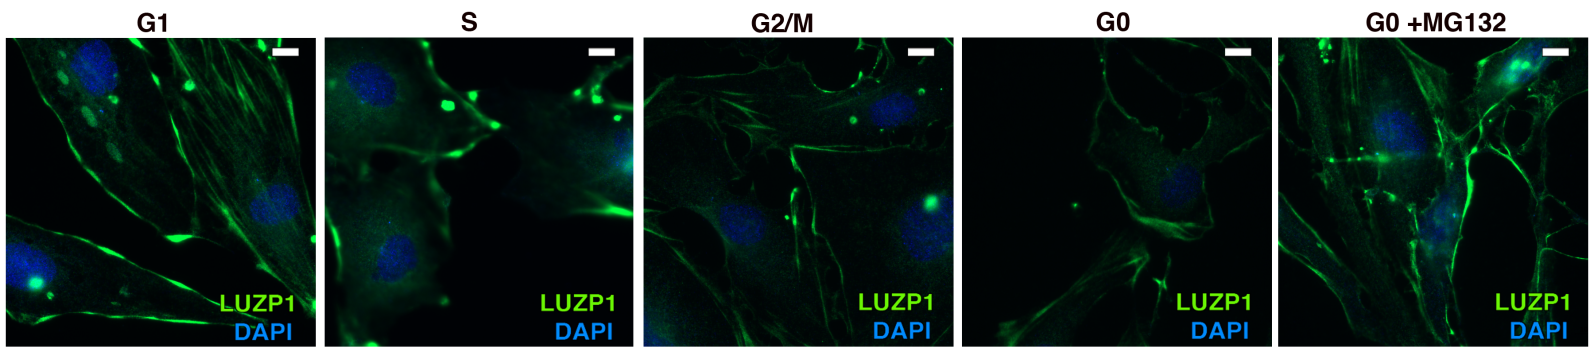

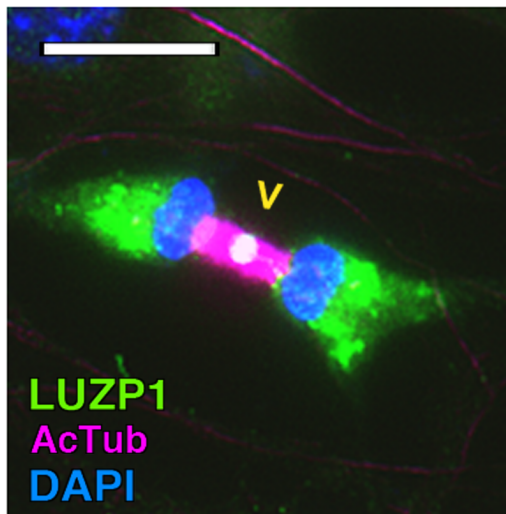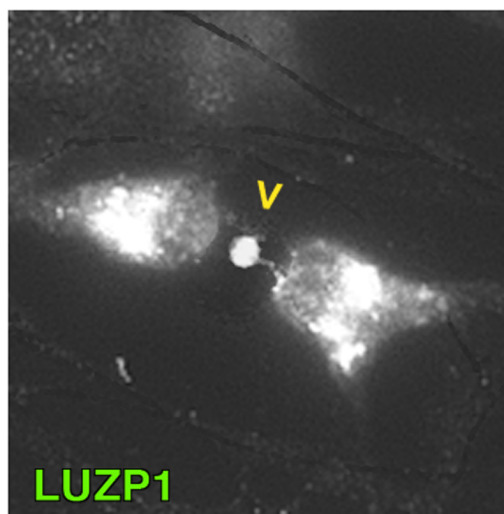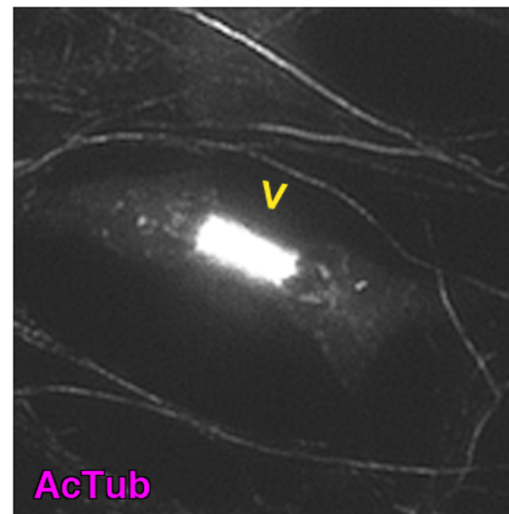

WT

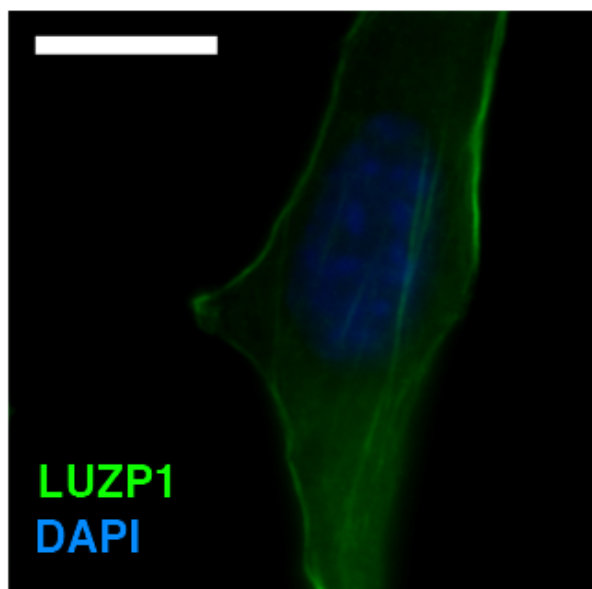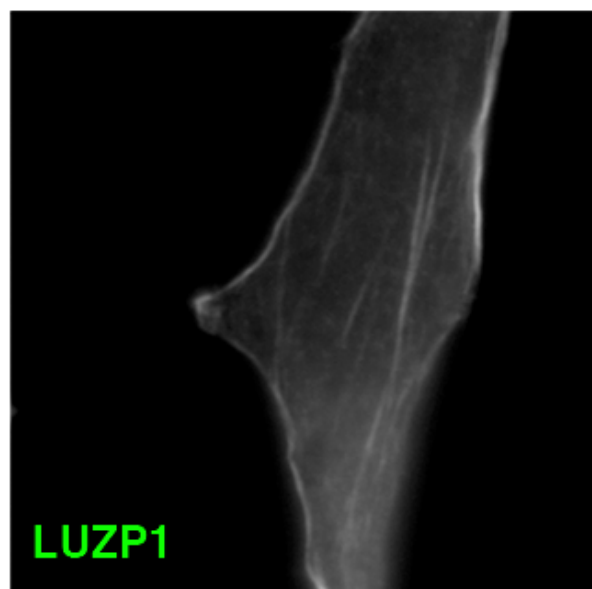

Luzp1<sup>-/-</sup>

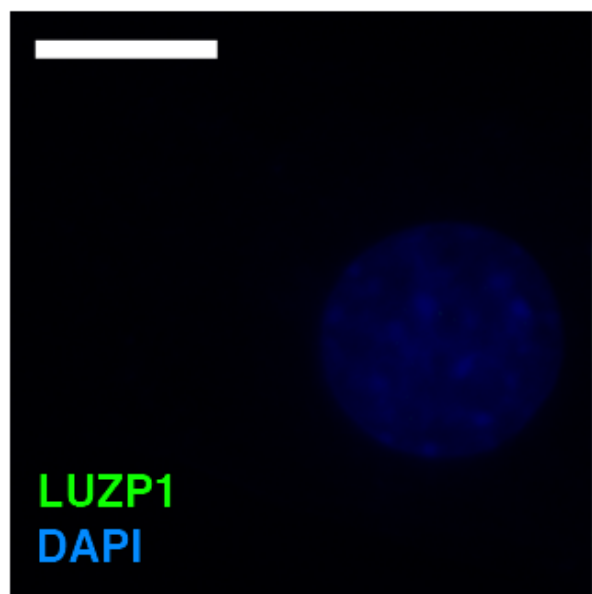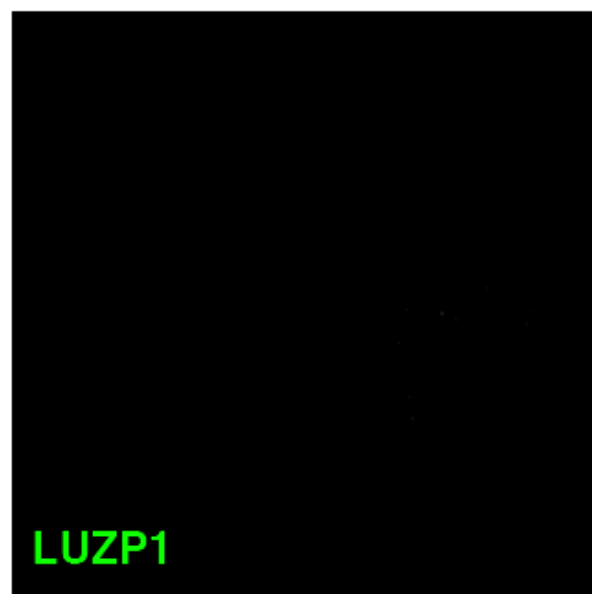

+LUZP1

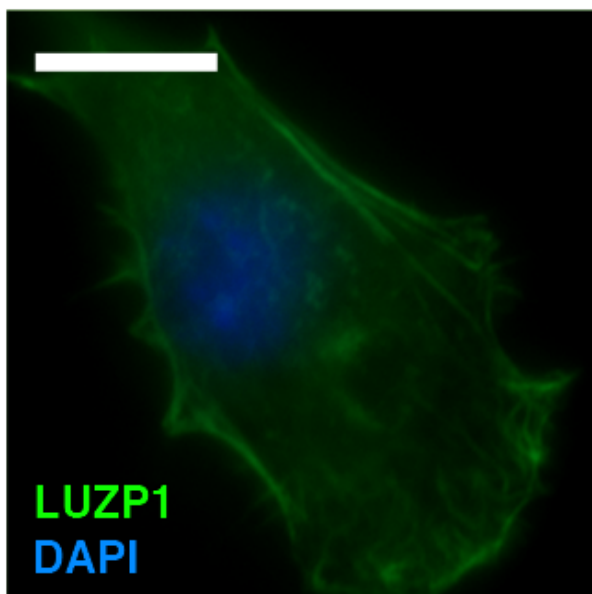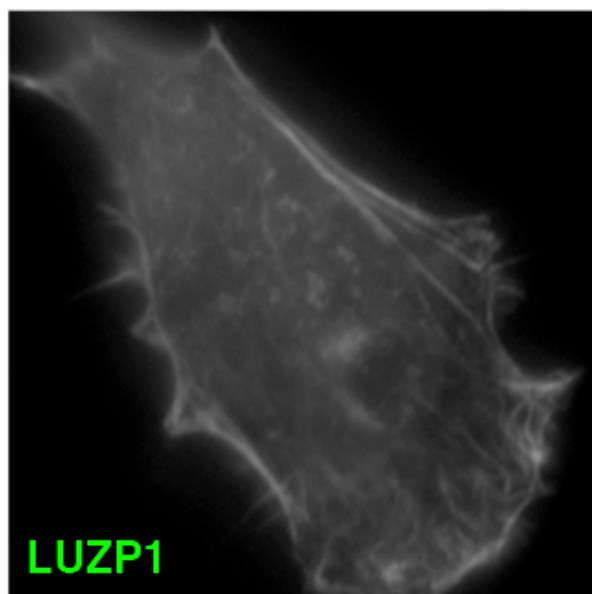



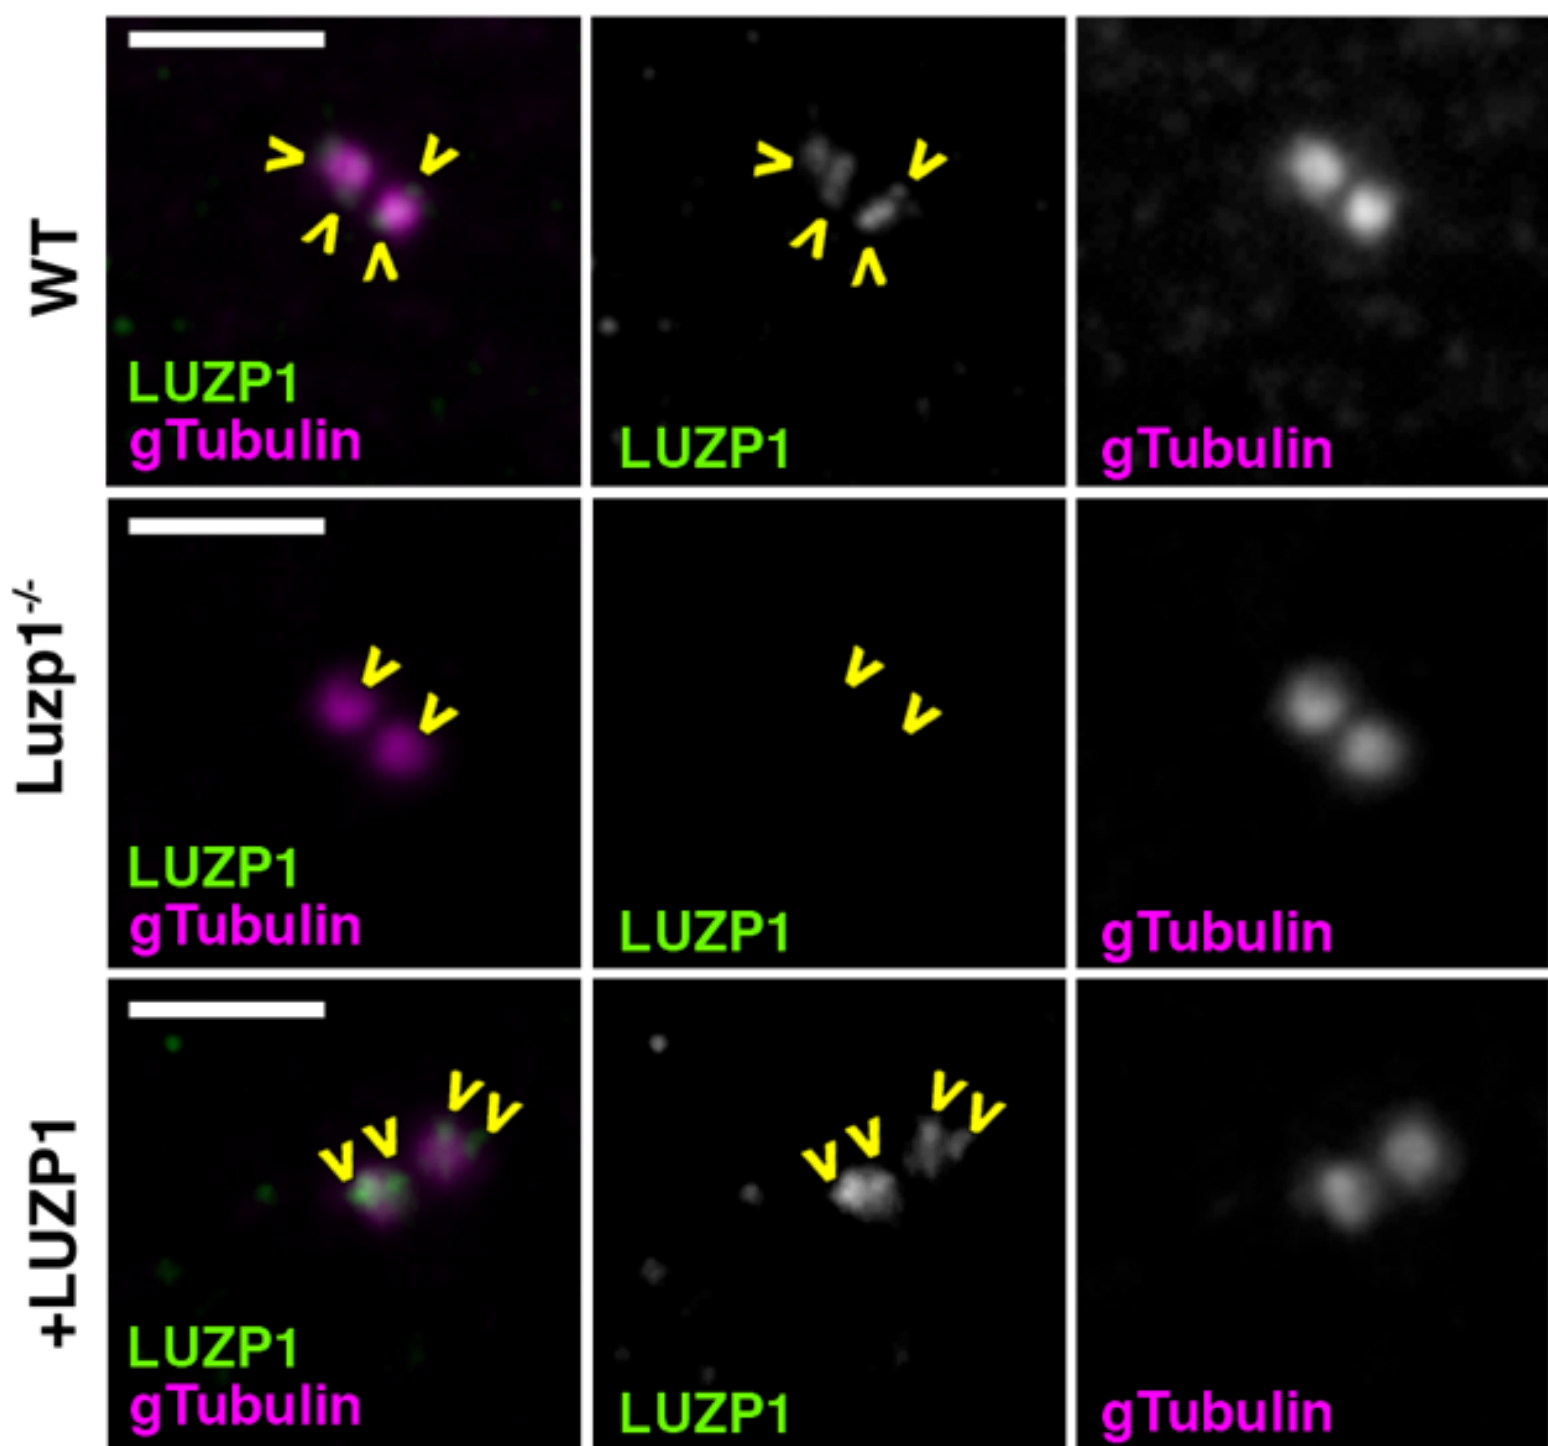

# Shh-LIGHT2

|                      |   |   |   |
|----------------------|---|---|---|
| WT                   | + | - | - |
| Luzp1 <sup>-/-</sup> | - | + | + |
| +LUZP1               | - | - | + |

LUZP1

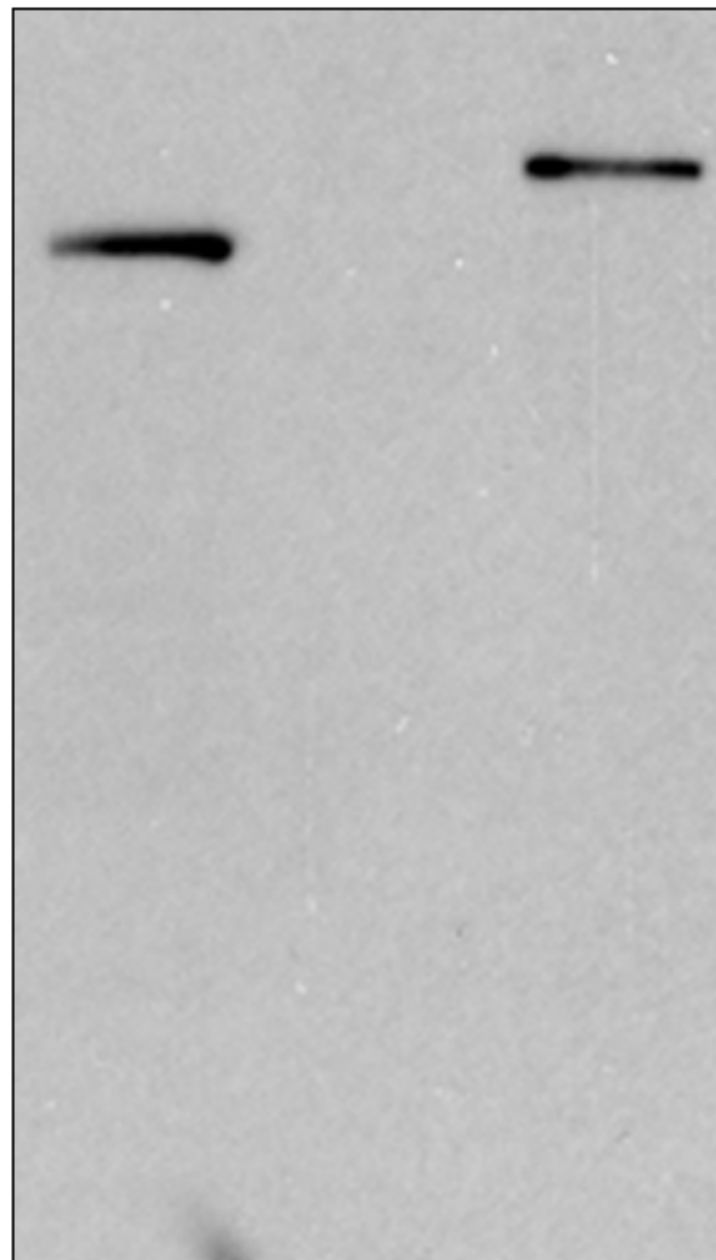

-250

-135

-75

-48

-35

GAPDH

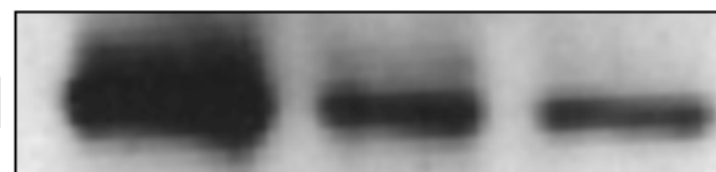

-35

**Figure 6C**

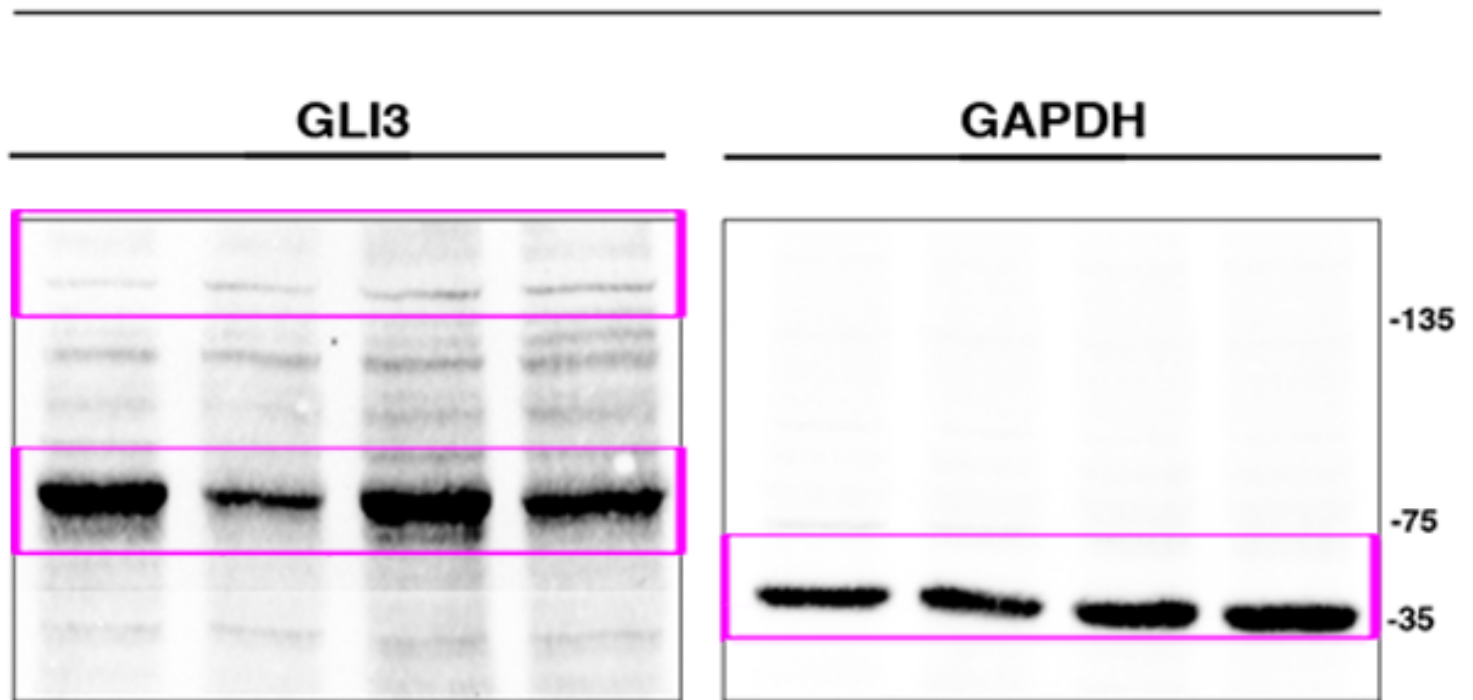

**Figure 7A**

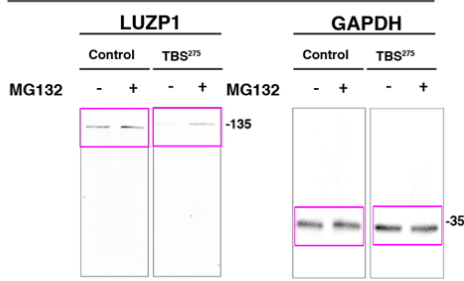

**Figure 7C**

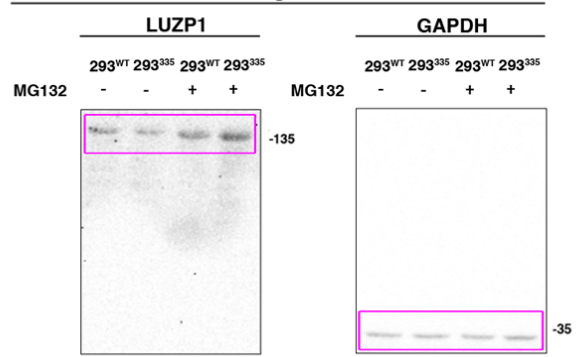

**Figure 7E**

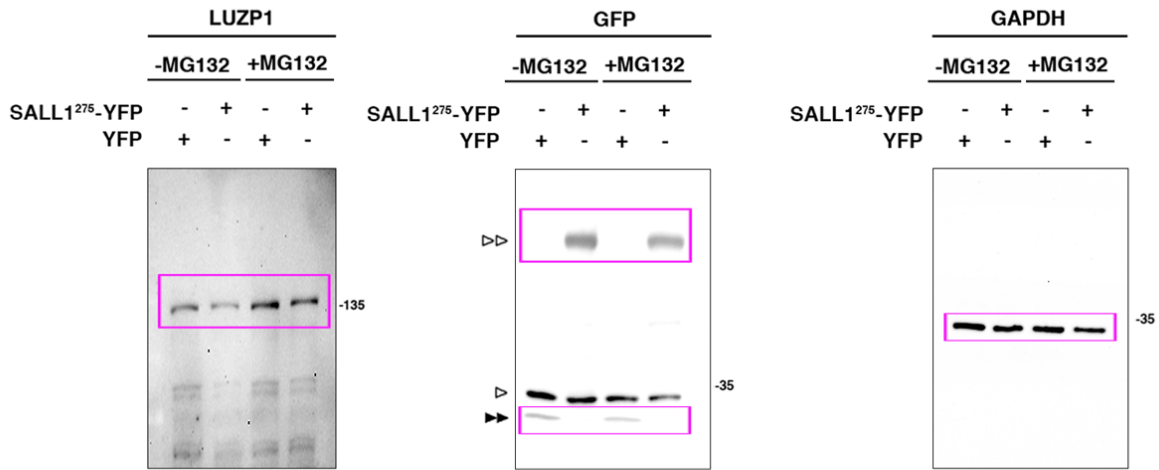

**Figure 7G**

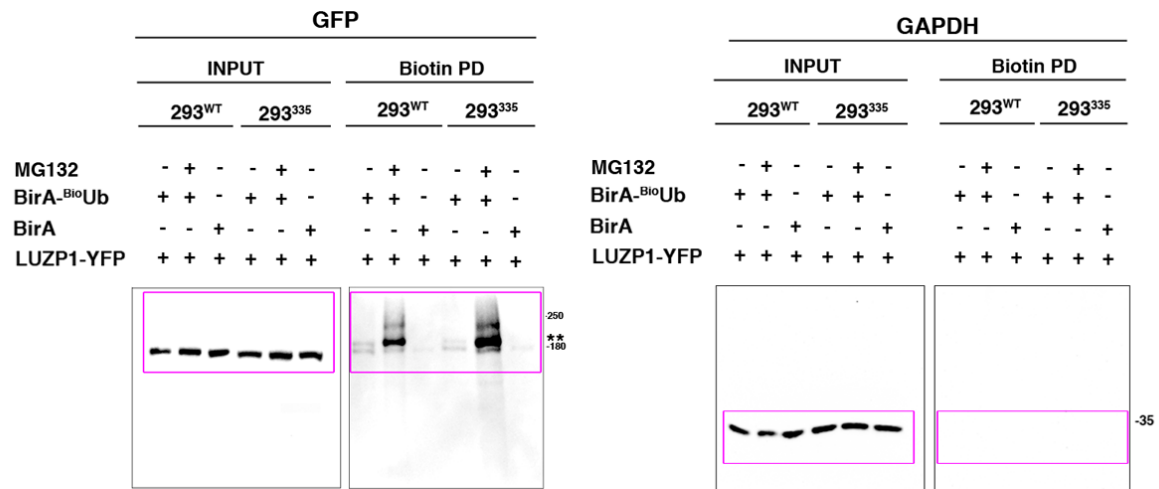

**Figure 7G**

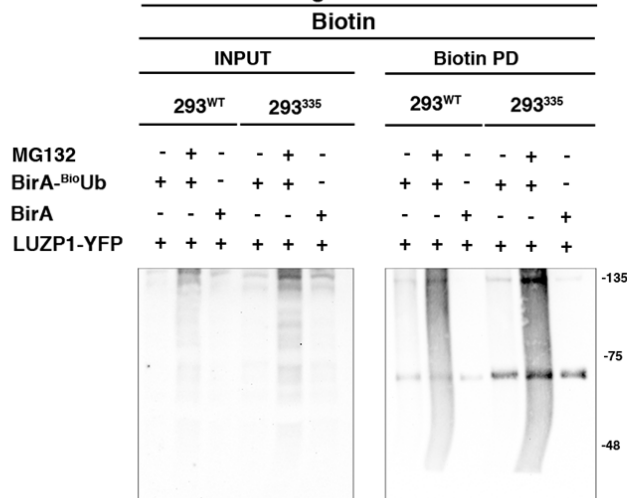

**LUZP1 mRNA expression  
(fold change)**

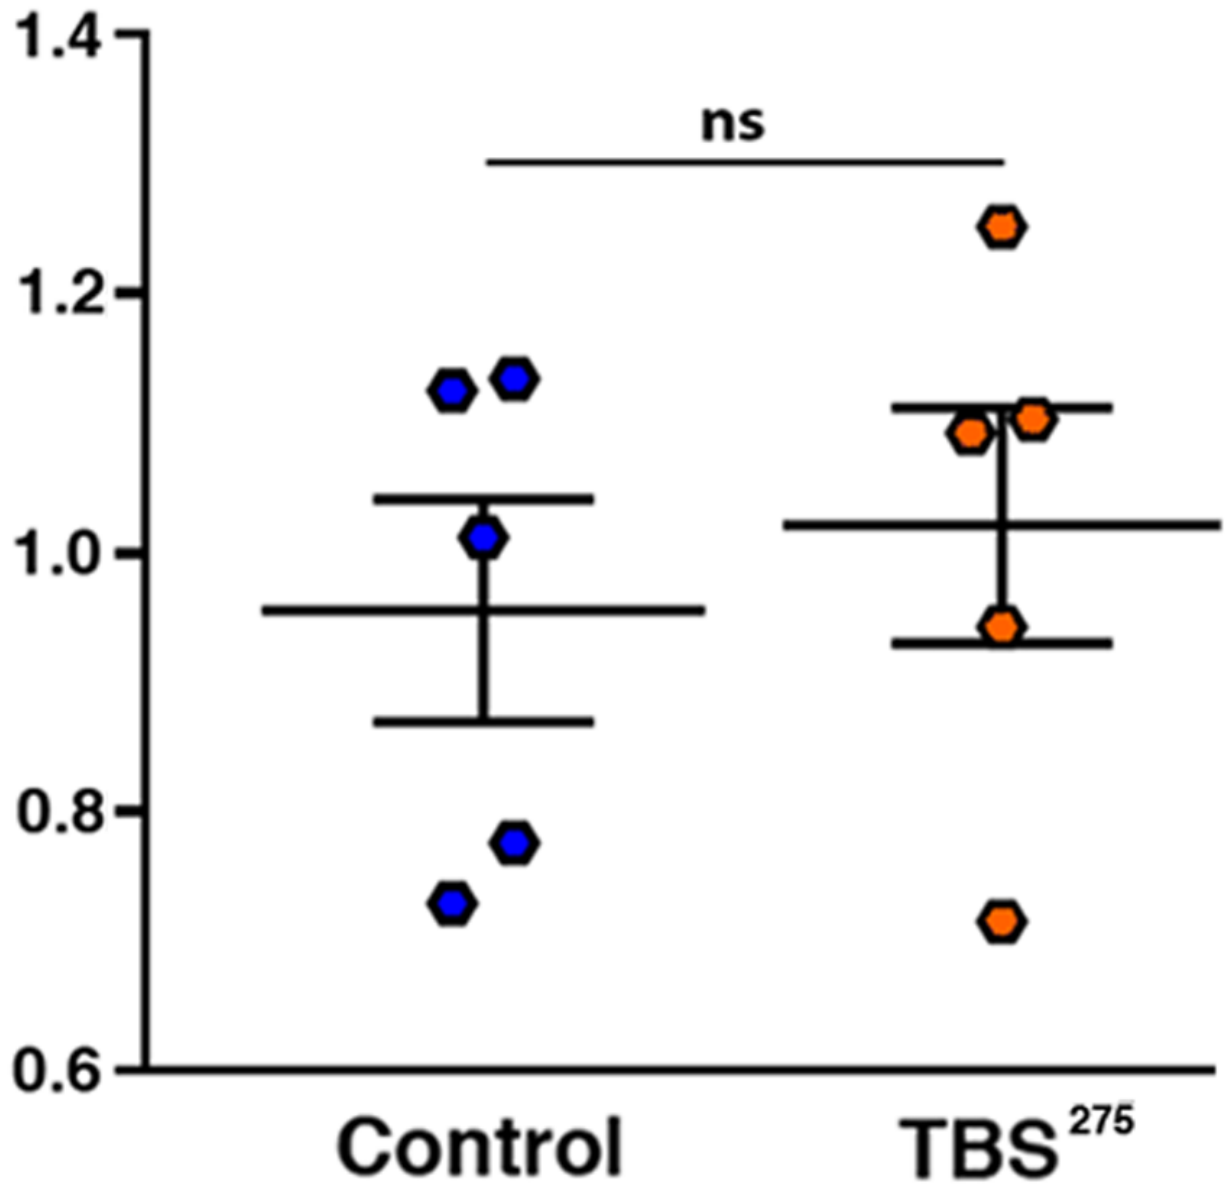

Source: https://www.biorxiv.org/content/10.1101/721316v1.full.pdf
